# 1 Context-dependent functional compensation between Ythdf m<sup>6</sup>A 2 readers

3  
4 Lior Lasman<sup>1</sup>, Vladislav Krupalnik<sup>1</sup>, Shay Geula<sup>2</sup>, Mirie Zerbib<sup>1</sup>, Sergey Viukov<sup>1</sup>, Nofar Mor<sup>1</sup>, Alejandro  
5 Aguilera Castrejon<sup>1</sup>, Orel Mizrahi<sup>1</sup>, Sathe Shashank<sup>3</sup>, Aharon Nachshon<sup>1</sup>, Dan Schneir<sup>1</sup>, Stefan Aigner<sup>3</sup>,  
6 Archana Shankar<sup>3</sup>, Jasmine Mueller<sup>3</sup>, Noam Stern-Ginossar<sup>1</sup>, Gene W Yeo<sup>3</sup>, Noa Novershtern<sup>1</sup>@, Jacob H  
7 Hanna<sup>1</sup>@

8 <sup>1</sup> The Department of Molecular Genetics, Weizmann Institute of Science, Rehovot 7610001, Israel.

9 <sup>2</sup> Children's Research Institute, UT Southwestern Medical Center, Dallas, TX 75235

10 <sup>3</sup> The Department of Cellular and Molecular Medicine, University of California, San Diego, La Jolla, CA 92093.

11 @ Correspondence should be addressed to Noa Novershtern (noa.novershtern@weizmann.ac.il) and Jacob H. Hanna  
12 (jacob.hanna@weizmann.ac.il)

13

## 14 Abstract

15

16 The N6-methyladenosine (m<sup>6</sup>A) modification is the most prevalent post-transcriptional mRNA  
17 modification, regulating mRNA decay, translation and splicing. It plays a major role during normal  
18 development, differentiation, and disease progression. The modification is dynamically regulated  
19 by a set of writer, eraser and reader proteins. The YTH-domain family of proteins: Ythdf1, Ythdf2,  
20 and Ythdf3, are three homologous m<sup>6</sup>A binding proteins, which have different cellular functions.  
21 However, their sequence similarity and their tendency to bind the same targets suggest that they  
22 may have overlapping roles. We systematically knocked out (KO) the Mettl3 writer for each of  
23 the Ythdf readers and for the three readers together (triple-KO). We then estimated the effect  
24 *in-vivo*, in mouse gametogenesis and viability, and *in-vitro*, in mouse embryonic stem cells  
25 (mESCs). We show that in gametogenesis, Mettl3-KO severity is increased as the deletion occurs  
26 earlier in the process, and Ythdf2 has a dominant role that cannot be compensated by Ythdf1 or  
27 Ythdf3, possibly due to differences in readers' expression, both in quantity and in spatial location.  
28 By knocking out the three readers together and systematically testing offspring genotypes, we  
29 have revealed a redundancy in the readers' role during early development, a redundancy which  
30 is dosage-dependent. Additionally, we show that in mESCs there is compensation between the  
31 three readers, since the inability to differentiate and the significant effect on mRNA decay occur  
32 only in the triple-KO cells and not in the single KOs. Thus, we suggest a novel model for the Ythdf  
33 readers function. There is a dosage-dependent redundancy when all three readers are co-  
34 expressed in the same location in the cells.

35

## 36 Introduction

37

38 RNA modifications are a layer of gene expression regulation, similar to DNA and protein  
39 modifications (Heck and Wilusz 2019). N6-methyladenosine, also known as m<sup>6</sup>A, is the most  
40 abundant mRNA modification (Heck and Wilusz 2019). It was first discovered in the 70's, but  
41 major progress was done in recent years due to new approaches of mapping m<sup>6</sup>A sites  
42 (Dominissini et al. 2012; Meyer et al. 2012; Garcia-Campos et al. 2019). Its importance was shown

43 in a wide range of organisms and processes, from yeast meiosis (Schwartz et al. 2013), sex  
44 determination in drosophila (Kan et al. 2017), and up to mammalian early development (Geula  
45 et al. 2015), neural development (Wang et al. 2018) and hematopoiesis (Lee et al. 2019).

46  
47 m<sup>6</sup>A modification is highly regulated by writer, reader and eraser proteins. Mettl3 forms a  
48 heterodimer with Mettl14 (Liu et al. 2014), and together with the supporting WTAP protein,  
49 catalyzes m<sup>6</sup>A with preference to 3'UTR, 5'UTR, long exons, and near stop codons (Heck and  
50 Wilusz 2019). FTO and Alkbh5 are eraser enzymes found in vertebrates (Zheng et al. 2013; Jia et  
51 al. 2011), and potentially have distinct role and localization in the cell (Zheng et al. 2013; Wei et  
52 al. 2018).

53  
54 Multiple proteins were identified as m<sup>6</sup>A readers, with the YTH domain-containing proteins  
55 (Ythdf and Ythdc) stand out among them. Recent studies link these proteins to different functions  
56 in RNA metabolism: Ythdf1 and Ythdf3 were shown to promote translation by recruiting  
57 translation initiation factors in HeLa cells (Shi et al. 2017; Wang et al. 2015; Li et al. 2017), Ythdf2  
58 was linked to degradation, partially by recruiting the CCR4-NOT deadenylase complex (Du et al.  
59 2016; Wang et al. 2014), and nuclear Ythdc1 was shown to regulate splicing (Kasowitz et al. 2018;  
60 Hartmann et al. 1999). Ythdf1, 2 & 3 share high protein sequence similarity (67-70%, **Figure S1a**).  
61 In addition, they have co-evolved during evolution. While *Drosophila melanogaster* has one copy  
62 of Ythdf protein (named Ythdf), vertebrates have three functional proteins (**Figure S1b**), probably  
63 generated following duplication events (Pervaiz et al. 2019).

64  
65 It is not fully clear whether each one of the Ythdf readers fulfills a distinct role. Their sequence  
66 similarity, and that they are all localized in the cytoplasm (Wang et al. 2015, 2014; Shi et al. 2017)  
67 and share many of their targets (Li et al. 2017; Patil et al. 2016, 2018) indicate partial redundancy.  
68 However, knockout (KO) of Ythdf2 alone is sufficient to stop proper oocyte maturation (Ivanova  
69 et al. 2017), and a single KO of Ythdf1 or of Ythdf2 causes neural defects (Li et al. 2018; Shi et al.  
70 2018), suggesting that in certain systems, Ythdf readers cannot compensate each other. This  
71 however could be a result of differences in expression levels in the different tissues.  
72 Comprehensive research into the redundancy between the three Ythdfs has not been conducted.  
73 In addition, the effect of knocking out the three readers *in-vivo* has not been described so far.

74  
75 In this study we use conditional single KOs of Mettl3 and Ythdf1, 2 & 3, and show that both Mettl3  
76 and Ythdf2 are essential for proper gametogenesis, and that mice lacking these proteins are  
77 either hypo-fertile or sterile. The severity of the phenotype is increased when the Mettl3 deletion  
78 is done earlier in the process. We found that the Ythdf readers have different expression patterns  
79 during gametogenesis, which might explain the lack of compensation in this process. In addition,  
80 we generated an *in vivo* triple-KO and found that it leads to impaired development as early as

81 E7.5, and to embryonic lethality. By using systematic genotyping of viable offspring, we found  
82 that in early development there is compensation between the readers, which is dosage-  
83 dependent, i.e. Ythdf2-heterozygous mice need to have at least one functional copy of another  
84 Ythdf reader to escape mortality. Furthermore, we used mESCs to analyze the function of each  
85 Ythdf reader separately, and together. We found that only triple-KO mESCs are not able to  
86 differentiate properly, and present a prolonged mRNA degradation rate, similar to the effect  
87 shown in Mettl3-KO, while no significant effect is seen in the single-KOs. This suggests that just  
88 like in early development, in mouse ESCs, a system in which all the readers are expressed in the  
89 same cells and compartment, there is a redundancy between Ythdf readers, which enables  
90 compensation in the absence of the other.

91

## 92 **Results**

93

### 94 **Mettl3 writer plays an essential role in oogenesis and spermatogenesis**

95

96 We started by systematically testing the three readers in a specific system *in-vivo*, focusing on  
97 spermatogenesis and oogenesis. m<sup>6</sup>A writers Mettl3 and Mettl14 and m<sup>6</sup>A erasers FTO and  
98 ALKBH5 were found to be essential for proper gametogenesis in mouse. Their KO typically leads  
99 to defective maturation of sperm or ova, and hypofertility (Xu et al. 2017; Lin et al. 2017; Zheng  
100 et al. 2013; Tang et al. 2017; Lasman, L, Hanna, JH, Novershtern 2020; Kasowitz et al. 2018).

101 As for m<sup>6</sup>A readers, both Ythdc1 and Ythdc2 have an essential role in gametogenesis. Their KO in  
102 spermatogenesis or oogenesis leads to a severe hypofertility phenotype (Hsu et al. 2017; Bailey  
103 et al. 2017; Wojtas et al. 2017; Jain et al. 2018; Kasowitz et al. 2018). Knocking out Ythdf2 leads  
104 to normal ovulation but an inability to downregulate maternal mRNA. Thus, Ythdf2-KO females  
105 are sterile (Ivanova et al. 2017). In contrast, Ythdf2-KO males show normal seminiferous tubule  
106 histology (Ivanova et al. 2017). Depletion of Ythdf2 in mouse spermatogonia leads to defective  
107 cell morphology and decreases cell proliferation (Huang et al. 2020). However, further  
108 examination of all Ythdf readers in spermatogenesis is still required.

109

110 We assessed the importance of m<sup>6</sup>A in gametogenesis, both in males and females, using  
111 conditional KOs of the m<sup>6</sup>A writer Mettl3 (**Figure S2**). Mettl3<sup>flox/flox</sup> mice were crossed with mice  
112 carrying one of the following Cre constructs: ZP3-Cre which is activated during oogenesis, Stra8-  
113 Cre and Prm1-Cre, which are activated during spermatogenesis, and Vasa-Cre which is activated  
114 in the early stages of both. Thus, we could test the effect of Mettl3-KO systematically in different  
115 time points during gametogenesis, in both males and females.

116

117

118 Mettl3<sup>f/f</sup>Vasa-cre+ KO had a major effect on oocyte development. A dissection of Mettl3<sup>f/f</sup>Vasa-  
119 cre+ female mice showed abnormal ovary morphology (**Figure 1a-b**), and the mice were sterile  
120 (**Figure 1c**). Zp3 is expressed during a later stage of the oocyte maturation, prior to the  
121 completion of the first meiosis (Gao et al. 2017a). Accordingly, Mettl3<sup>f/f</sup>Zp3-cre+ female mice  
122 showed a normal ovary morphology (**Figure 1d**). However, the mice were sterile (**Figure 1e**).  
123 Flushing oocytes from the oviduct revealed an overall significant low number of oocytes (p-value  
124 <0.002, **Figure 1f**). All the flushed oocytes of the KO were stuck at the germinal vesicle (GV) stage  
125 and did not reach the two-cell stage upon fertilization attempts (**Figure 1g, S3a**), meaning that  
126 they have not completed the first meiosis. Indeed, immunostaining of tubulin in KO and WT  
127 oocytes, showed that KO oocytes were stuck in the GV stage, and did not proceed for GV  
128 breakdown and completion of the first meiosis (**Figure 1h**). The transcriptional profile of Mettl3-  
129 cKO and control oocytes revealed a major change in transcription (**Figure S3b**), including aberrant  
130 expression of genes related to oocyte development (**Figure S3c-d, Table S1**).  
131

132 Next, we tested the role of Mettl3 in spermatogenesis. Mettl3<sup>f/f</sup>Vasa-cre+ male mice, in which  
133 the KO was activated during primordial germ cells, showed a massive reduction in the testis  
134 volume (**Figure 2a**), severe degenerative defects (**Figure S4a**), and sterility (**Figure 2b**), as was  
135 reported elsewhere (Xu et al. 2017; Lin et al. 2017). Similarly, a dissection of Mettl3<sup>f/f</sup>Stra8-cre+  
136 male mice, in which the KO was activated during early-stage spermatogonia, showed a  
137 significantly reduced testis volume (**Figure 2c**), mild degenerative changes in seminiferous  
138 tubules (**Figure S4b**), and ~75% reduction in sperm quantity observed in the cauda epididymis  
139 (**Figure S4b**). Indeed, Mettl3<sup>f/f</sup>Stra8-cre+ mice showed significant hypofertility compared to their  
140 counterpart control (**Figure 2d**), similar to what was previously reported (Lin et al. 2017).  
141 Interestingly, Mettl3<sup>f/f</sup>Prm1-cre+ male mice, in which the KO was activated in the spermatids  
142 (**Figure 2e**), showed normal fertility (**Figure 2f**) and typical seminiferous tubules morphology  
143 (**Figure S4c**).  
144

145 In summary, our genetic dissection of Mettl3's role during gametogenesis shows the pivotal role  
146 of m<sup>6</sup>A modifications in both oogenesis and spermatogenesis. The severity of the phenotype was  
147 dependent on the stage in which Mettl3 was depleted. Therefore, we tested the effect of Ythdf  
148 KO, which might have a milder effect on the process.

149  
150 **Ythdf2 is the only Ythdf reader which is essential for gametogenesis, and has a different**  
151 **expression pattern than Ythdf1 and Ythdf3**

152  
153 To understand the role of the Ythdf family in gametogenesis, we knocked out each of the three  
154 readers using CRISPR-Cas9 (**Figure S1c**). Heterozygous mice were further crossed to give full KO  
155 for each of the Ythdfs. The mice that were born were validated by genotyping (**Figure S1d**).

156 Ythdf1<sup>-/-</sup> and Ythdf3<sup>-/-</sup> mice were born in the expected Mendelian ratio (**Figure 3a**) and showed  
157 no apparent defects. However, 80-83% of Ythdf2<sup>-/-</sup> pups died shortly after birth, leading to a sub-  
158 Mendelian ratio 30 days after birth (**Figures 3a**).

159 Ythdf1-KO and Ythdf3-KO mice were fertile as their control counterparts (**Figure S5a-d**) and did  
160 not show any histological defect in their reproductive organs (**Figure S5e-f**). As for Ythdf2, the  
161 few viable KO mice that survived were tested. While Ythdf2-KO female mice showed normal  
162 oocyte morphology (**Figure S6a**), they were sterile (**Figure S6b**), suggesting a later defect than  
163 what was observed in Mettl3<sup>f/f</sup>Zp3-cre<sup>+</sup> oocytes. Indeed, a recent work showed that Ythdf2-KO  
164 oocytes could be fertilized but do not develop beyond the 8-cell stage, probably because of their  
165 inability to reduce maternal RNA (Ivanova et al. 2017). Next, the oocytes were flushed after  
166 hormone priming and measured for RNA levels using SMART-seq. Although the morphology was  
167 indistinguishable from WT, on the molecular level, the cells of Ythdf2-KO were already distinctly  
168 clustered compared to WT (**Figure S6c**). Among the 311 genes that were downregulated in the  
169 KO (**Table S1**), 72 are related to extracellular matrix (p<1.35e-06), which is crucial for oocyte  
170 fertility. Interestingly, in sperm too, m<sup>6</sup>A regulation of metallopeptidase is mediated by Ythdf2  
171 (Huang et al. 2020).

172 Ythdf2-KO male mice showed mild degenerative changes in the seminiferous tubules (**Figure**  
173 **S4d**), and severe loss of sperm in the cauda epididymis (**Figure S4e**). Accordingly, these males  
174 were hypofertile (**Figure 2g**). Measuring expression in WT and KO round sperm cells, we observed  
175 changes in expression in 301 genes (**Figure S4f, Table S1**), many of them associated with  
176 cytoskeleton, microtubules and cilium functions (**Figure S4f**), possibly explaining the impaired  
177 sperm maturation. In addition, some metallopeptidases were up-regulated in the KO (e.g.  
178 Adam4, Adamts3, Cpxm1).

179  
180 Although Ythdf1 and Ythdf3 share high sequence homology with Ythdf2, they cannot compensate  
181 for its depletion during gametogenesis. One possible explanation for this observation is that the  
182 proteins are not expressed in the same spatial or temporal space during the process. To test this  
183 hypothesis, we immunostained histological sections of the testis for different reader expression.  
184 Indeed, immunostaining of seminiferous tubules showed that Ythdf1, Ythdf2 and Ythdf3 are  
185 expressed in different cells during the sperm maturation process (**Figure 2h**). Similarly, staining  
186 of GV oocytes showed a different expression pattern for Ythdf2, as it is the only Ythdf reader that  
187 is located both in the cytoplasm and nucleus (**Figures 1i, S7**). Thus, the different expression  
188 pattern of the Ythdf readers in gametogenesis may explain the lack of compensation for Ythdf2  
189 depletion.

190  
191 **Ythdf readers compensate one another in a dosage-dependent manner in early development**

192

193 Next, we tried to generate Ythdf triple-KO mice for a more comprehensive understanding of the  
194 readers' roles *in-vivo*. Ythdf1<sup>-/-</sup> and Ythdf3<sup>-/-</sup> mice were crossed, and the double heterozygote  
195 offspring were further crossed with Ythdf2<sup>+/-</sup> mice to generate triple heterozygote mice to all  
196 three readers (Ythdf1<sup>+/-</sup>Ythdf2<sup>+/-</sup>Ythdf3<sup>+/-</sup> or "triple-HET") (**Figure 3b**). Triple-HET mice were  
197 crossed, and all their offspring (n=200) were genotyped on day 30 post-natal (**Figure 3c**). The  
198 ratio of offspring with Ythdf2-WT genotype was as or above the expected Mendelian-ratio, while  
199 no offspring with Ythdf2-KO were detected. Interestingly, even when the mice were only  
200 heterozygote for Ythdf2 (Ythdf2<sup>+/-</sup>), the Mendelian-ratio of offspring with another missing reader  
201 was below the expected ratio (Ythdf1<sup>-/-</sup>2<sup>+/-</sup>3<sup>+/-</sup>, threefold below expected, Ythdf1<sup>+/-</sup>2<sup>+/-</sup>3<sup>-/-</sup>,  
202 fourfold below expected, p<0.012). Moreover, we could not detect any offspring which were  
203 Ythdf2<sup>+/-</sup> and null in the two other readers (Ythdf1<sup>-/-</sup>Ythdf2<sup>+/-</sup>Ythdf3<sup>-/-</sup>). These results suggest that  
204 lack of Ythdf1 or Ythdf3 can be compensated by the two other readers. However, the lack of  
205 Ythdf2 cannot be compensated by Ythdf1 or Ythdf3. In addition, the fact that partial expression  
206 of Ythdf2 in the heterozygous lineage requires the expression of at least one other reader,  
207 suggests that the function of the readers is dosage-dependent, and that a certain threshold of  
208 Ythdf readers are needed to be expressed in the cell to accomplish their function.

209

210 To better understand in which stage of development the triple-KO is defected, we analyzed triple-  
211 KO embryos on embryonic day 7.5 (E7.5). We found that already in this early stage of the post-  
212 implantation development, the triple-KO embryos were broadly deformed compared to the WT  
213 control (**Figure 3d**).

214

### 215 **Triple-KO mESCs show normal self-renewal ability, but have an impaired ability to** 216 **differentiate**

217

218 We found that the Ythdf proteins can compensate one another *in-vivo* when expressed in the  
219 same cells, and that this compensation is dosage-dependent. Next, we wanted to better  
220 understand the molecular mechanism in which the different Ythdfs process mRNA molecules and  
221 thus affect cell viability and differentiation potential. We hypothesized that mESCs would be a  
222 good model for studying the molecular role of the readers *in-vitro*, since this is a system in which  
223 we can systematically perturb the cells and test the stem-cell activity outcomes (self-renewal and  
224 differentiation). In addition, in contrast to gametogenesis, all of the Ythdf readers are expressed  
225 in the same cells (**Figure 4a**) thus enabling us to test different compensation mechanisms. We  
226 stained for the readers in mouse ESCs, and indeed all were found to be expressed in the cytosolic  
227 compartment of the cells (**Figures 4a**). Next, we knocked out each of the Ythdfs in mouse ESCs  
228 using the CRISPR/Cas9 strategy (**Figure S8a**). In addition, we generated a triple-KO line,

229 Ythdf1/2/3 KO using a sequential CRISPR KO. All KO cell lines were validated by immuno-staining,  
230 DNA sequencing and RNA sequencing (**Figures S8-10**).

231

232 All cell lines were viable and showed similar self-renewal ability as WT cells in mESC naïve growing  
233 conditions (**Figure 4b**). In addition all cell lines expressed normal pluripotent markers (**Figure 4c**).  
234 We next wanted to test their ability to undergo differentiation using *in-vivo* and *in-vitro* assays.  
235 First we tested their ability to generate teratomas upon injection to immune-deficient mice  
236 (**Figures 4d,e**). Interestingly, while WT and single-KO teratomas generated differentiated  
237 structures containing the three germ layers, and stained for developmental markers such as  
238 Foxa2 and Tuj1, triple-KO teratomas were poorly differentiated, and broadly stained for Oct4, a  
239 pluripotent marker (**Figures 4d,e**), indicating their poor ability to differentiate.

240 To further examine the differentiation potential of our cells, the teratomas were disaggregated  
241 and cultured in mouse ESC medium for six days. Triple-KO cells generated significantly more  
242 pluripotent colonies, as shown by alkaline phosphatase staining (**Figure 4f**). In addition, embryoid  
243 bodies (EBs) were generated from all our cell lines, followed by RNA extraction and qPCR. Once  
244 again, differentiation markers were modestly expressed in the triple-KO EBs (**Figure 4g**),  
245 indicating their poor differentiation, compared to WT and single-KO cell lines. This phenotype is  
246 highly similar to the “hyper-pluripotency” phenotype which we observed previously in Mettl3-  
247 KO cells (Geula et al. 2015).

248

#### 249 **The transcriptional profile of triple-KO is distinct from WT and single-KO**

250

251 To dissect the molecular profile of single-KOs and the triple-KO, transcription profiles were  
252 measured using RNA-seq from each of the cell lines (Ythdf1<sup>-/-</sup>, Ythdf2<sup>-/-</sup>, Ythdf3<sup>-/-</sup>, Ythdf1/2/3<sup>-/-</sup>).  
253 In addition, we had a WT control and a positive control consisting of cells that are knocked-out  
254 to Mettl3, which lack m<sup>6</sup>A methylation and were previously shown to be hyper-pluripotent (Geula  
255 et al. 2015). Clustering the samples based on their transcriptional profile showed that while  
256 single-reader-KO samples cluster together with WT samples, triple-KO samples clusters more  
257 closely to Mettl3<sup>-/-</sup> samples (**Figures 5a, S11a**), suggesting that single-KOs do not have a dramatic  
258 effect on the transcription profile of the cells, supporting our redundancy hypothesis.

259

260 When we analyzed the number of differentially expressed genes in each of the cell lines (**Figure**  
261 **5b, Table S2**), we could see that the few genes that were upregulated in the single-KOs (77 in  
262 Ythdf1, 16 in Ythdf2, 37 in Ythdf3), greatly overlapped with the genes that were up-regulated in  
263 triple-KO and to a lesser extent in Mettl3-KO (**Figure S11b**). Interestingly, several of the genes  
264 that were upregulated in Ythdf1-KO, Ythdf3-KO and triple-KO, but not in Ythdf2-KO, were  
265 significantly enriched for two-cell stage embryo genes (genes that are expressed after the first  
266 division of the zygote), such as Zscan4a,c,d,f, Usp17a,b,c,e, Zfp352, Gm20767 and Tcstv1 (**Figure**

267 **5c, 5d and S11b)** (Storm et al. 2009). This suggests the even though most of Ythdfs' effects on  
268 transcription are redundant, some Ythdf readers cannot always compensate for the absence of  
269 the others.

270

271 To further investigate the role of the Ythdfs, their RNA binding target profile was measured in  
272 three different single-Ythdf flag-tagged mESC lines using the eCLIP method (Van Nostrand et al.  
273 2016). We found 201, 1995 and 146 targets that were bound by Ythdf1, Ythdf2 and Ythdf3  
274 respectively. All the found targets significantly overlapped with previously published data  
275 measured in human (Patil et al. 2016; Wang et al. 2015; Li et al. 2017; Niu et al. 2013; Shi et al.  
276 2017) (**Figure S12a-c**). In addition, a significant part of the genes bound by the readers, also carry  
277 m<sup>6</sup>A methylation, 75%, 70% and 63% for Ythdf1, Ythdf2 and Ythdf3 respectively (**Figure S12d**).  
278 When we analyzed the common peaks between the readers, we found that the peaks bound by  
279 Ythdf1 and Ythdf3 highly overlap the peaks bound by Ythdf2 (72% and 49%, respectively, **Figure**  
280 **S12e, Table S3**), indicating again a possible redundancy between the readers' binding sites.  
281 However, targets of Ythdf1 and Ythdf3 were not enriched for two-cell genes, which are typically  
282 not expressed in mESCs, but rather to blastocyte genes that are expressed in mESCs (**Figure 12f**).  
283 To investigate the roles of Ythdf1&3 in the context of two-cell genes, binding profiling needs to  
284 be done in two-cell stage embryos, which is not feasible with the current technology (Van  
285 Nostrand et al. 2016).

286

### 287 **Significant increases in m<sup>6</sup>A methylated mRNA half-life seen in only the triple-KO**

288

289 Previous studies proposed that m<sup>6</sup>A has a role in mRNA degradation (Du et al. 2016; Geula et al.  
290 2015), specifically, Wang et al. (2014) suggested that Ythdf2 binds methylated transcripts and  
291 directs them to mRNA decay sites. We therefore examined the decay rate in mouse ESCs, in each  
292 of the single-KO and triple-KO cells. We treated the cells with actinomycin-D, and harvested RNA  
293 at three time points (t=0, 4h, 8h, with duplicates of 0 and 8). We estimated transcription levels  
294 using 3' poly-A RNA-seq (Geula et al. 2015), and calculated the mRNA half-life (**Methods, Table**  
295 **S4**). In single-KO cells, including Ythdf2-KO, m<sup>6</sup>A-methylated mRNA was degraded at a similar rate  
296 to non-methylated mRNA (**Figure 6a**). Only in the triple-KO cells we observed a significant  
297 increase in the half-life of m<sup>6</sup>A methylated mRNA, compared to non-methylated mRNA, similar  
298 to what was observed in Mettl3-KO (**Figure 6a**). The fact that in single-KOs there was no  
299 significant effect on degradation, suggests that all of the readers have similar roles in mRNA  
300 degradation and can compensate one another.

301 A previous study (Du et al. 2016) showed that Ythdf2 recruits the CCR4-NOT complex to mediate  
302 accelerated deadenylation and decay. Interestingly, we observed that also Ythdf1 and Ythdf3  
303 interact with CNOT1, a subunit of the CCR4-NOT complex (**Figure 6b**). Indeed, Ythdf1 and Ythdf3



304 were also shown to promote deadenylation (Du et al. 2016), further supporting the hypothesis  
305 that the three readers contribute to mRNA decay, and may compensate in case of a partial loss.

306

307 Translation was also reported as a possible biological process that is affected by m<sup>6</sup>A methylation  
308 (Shi et al. 2017). We therefore set to measure translation in our cell lines, using a ribosomal  
309 footprint, which measures fragments of mRNA that are bound to a ribosome (Stern-Ginossar et  
310 al. 2012). To compare translation, the ribosomal footprint was normalized by mRNA levels, giving  
311 a translation efficiency level for each gene in each cell line. We observed higher translation  
312 efficiency of m<sup>6</sup>a-methylated genes, and of Ythdf targets, compared to non-methylated genes  
313 **(Figure S13b)**. However, this difference in translation efficiency was not affected by any of the  
314 knockouts, suggesting that translation efficiency is not mediated directly by m<sup>6</sup>A methylation or  
315 the Ythdfs proteins. Interestingly, a mild but significant increase in the expression of ribosomal  
316 genes **(Figure 6c)** was observed in single-KO and triple-KO cell lines, an increase which is less  
317 apparent in the global gene population **(Figure 6d)**.

318

## 319 Discussion

320

321 Previous papers have suggested that each of the Ythdf readers has unique functions (Shi et al.  
322 2017; Wang et al. 2015; Li et al. 2017; Du et al. 2016; Wang et al. 2014). We propose a different  
323 model, according to which, Ythdf readers have redundant functions to some extent, and show  
324 multiple lines of evidence supporting this model.

325

326 Using a viability assay, we observed that there is compensation between the readers, and this  
327 compensation is dosage dependent: Ythdf2 full KO or Ythdf2-heterozygotes that are also null in  
328 the two other readers, are not viable. Ythdf2 heterozygote mice need at least one functional copy  
329 of another Ythdf to escape total mortality **(Figure 3c)**. The fact that Ythdf2-KO has the most  
330 severe lethality phenotype may be due to differences in expression patterns, as seen in oogenesis  
331 and spermatogenesis **(Figures 1i, 2h)**.

332

333 The strongest evidence for Ythdf redundancy was observed in mESCs, a system in which all Ythdf  
334 readers are expressed in the cytoplasmatic compartment, thus allowing examination of our  
335 hypothesis. Indeed, in mESCs, we observed a redundancy in the function of Ythdf readers. Single-  
336 KOs were viable, had normal self-renewal ability, expressed pluripotent markers and  
337 differentiated normally upon signaling. Only in the Ythdf triple-KO did we observe an impaired  
338 differentiation ability *in-vivo* and *in-vitro*, similar to the Mettl3-KO phenotype (Geula et al. 2015)).  
339 In addition, only in the triple-KO did we observe a significant decrease in the degradation rate of  
340 m<sup>6</sup>A methylated transcripts, while no change was observed in the single-KOs. Redundancy is also

341 supported by the observation that all Ythdf readers were found to bind Cnot1, part of the CCR4-  
342 NOT deadenylation complex which is a suggested degradation mechanism (Du et al. 2016).

343

344 The difference in expression patterns *in-vivo* hints to us that Ythdf readers are differentially  
345 regulated. Further experiments that induce the expression of Ythdf1/3 under the promoter of  
346 Ythdf2 can strongly support this hypothesis. Such a system can be examined in additional  
347 developmental processes such as neurogenesis or hematopoiesis. Lastly, the mechanisms that  
348 regulate Ythdf expression, such as transcription factors that bind the readers, and the reader's  
349 response to external signals, await further investigation.

350

#### 351 **Abbreviation used:**

352 KO - knockout

353 WT – wild type

354 mESCs – mouse embryonic stem cells

355 EBs – embryoid bodies

356 GV – germinal vesicle

357 TE – translation efficiency

358

#### 359 **Acknowledgments**

360 **JHH and NN are funded by** Nella and Leon Benozziyo Center for Neurological Diseases; David and Fela Shapell Family  
361 Center for Genetic Disorders Research; Kekst Family Institute for Medical Genetics; Helen and Martin Kimmel  
362 Institute for Stem Cell Research; Flight Attendant Medical Research Council (FAMRI); Dr. Barry Sherman Center for  
363 Medicinal Chemistry; Pascal and Ilana Mantoux; Dr. Beth Rom-Rymer Stem Cell Research Fund; Edmond de  
364 Rothschild Foundations; Zantker Charitable Foundation; Estate of Zvia Zeroni; European Research Council (ERC-CoG);  
365 Israel Science Foundation (ISF); Minerva; Israel Cancer Research Fund (ICRF) and BSF. **We thank Schraga Schwartz,**  
366 **Igor Ulitsky, Tsviya Olender, Eli Arama and Aharon Nachshon for insightful discussions and support.** We thank the  
367 Weizmann Institute management and board for providing critical financial and infrastructural support.

#### 368 **Author Contributions**

369 L.L. and J.H.H. conceived the idea for this project, designed and conducted the experiments. L.L. and N.N. wrote the  
370 manuscript with J.H.H. N.N. supervised all bioinformatics analysis and analyzed the data. V.K. assisted in libraries  
371 preparation, immunostaining and tissue culture. L.L., S.G. and V.K. engineered cell lines and mice strains under S.V.'s  
372 supervision. S.G. assisted in teratoma formation, immunostaining and Western Blots. M.Z. assisted in mouse  
373 dissection and oocyte flushing. N.M. assisted in tissue culture and Western Blots. A.A.C. assisted in oocyte staining.  
374 O.M. assisted in Ribo-seq library preparation, supervised by N.S.G; J.S., A.S. and S.A. conducted the eCLIP  
375 experiments. A.N. assisted in Ribo-seq analysis. S.S. analyzed the eCLIP data. G.W.Y. supervised the execution of the  
376 eCLIP experiments and analyses. J.H.H. and N.N. supervised executions of experiments, adequate analysis of data,  
377 and presentation of conclusions made in this paper.

378

379 **Declaration of Interests**

380 J.H.H. is an advisor to Accelta Ltd. and Biological Industries Ltd.

381

382 **Main Figure Legends**

383

384 **Figure 1. Mettl3 is essential for female mice fertility**

385 **a)** Gross morphology of Cre<sup>+</sup> and Cre<sup>-</sup> (control) female ovaries. Cre<sup>+</sup> females show a smooth  
386 shape that lacks the typical follicular morphology.

387 **b)** H&E staining of an ovary, showing a severe abnormality in Mettl3<sup>f/f</sup> Vasa-Cre<sup>+</sup> females.

388 **c)** Number of pups per plug produced by mating Mettl3<sup>f/f</sup> Vasa-Cre<sup>+</sup> females, compared to  
389 Mettl3<sup>f/f</sup> Vasa-Cre<sup>-</sup> control females. The fathers in both cases are WT. A significant difference  
390 between Cre<sup>+</sup> and Cre<sup>-</sup> female fertility is observed (p<0.0001, Mann-Whitney test).

391 **d)** H&E staining of ovaries, showing normal morphology in Mettl3<sup>f/f</sup> Zp3-Cre<sup>+</sup> ovaries.

392 **e)** Number of pups per plug produced by mating a Mettl3<sup>f/f</sup> Zp3-Cre<sup>+</sup> female, compared to a  
393 Mettl3<sup>f/+</sup> Zp3-Cre<sup>+</sup> control female. The fathers in both cases are WT. A significant difference  
394 between f/f and f/+ female fertility is observed (p<0.0001, Mann-Whitney test).

395 **f)** Number of oocytes per mouse produced by mating Mettl3<sup>f/f</sup> Zp3-Cre<sup>+</sup> females, compared to  
396 Mettl3<sup>f/f</sup> Zp3-Cre<sup>-</sup> control females. The fathers in both cases are WT. A significant difference  
397 between the number of oocytes of f/f Cre<sup>+</sup> and f/f Cre<sup>-</sup> is observed (p<0.0002, Mann-Whitney  
398 test).

399 **g)** Top: Experimental design – Mettl3<sup>f/f</sup> Zp3-Cre<sup>+</sup> and Cre<sup>-</sup> as control underwent hormone priming,  
400 flush, fixation and staining for tubulin. Bottom: Number of oocytes observed in the different  
401 stages of meiosis. In the control, most of the oocytes were in MI stage, in KO (Cre<sup>+</sup>) all of the  
402 observed oocytes were in the GV state.

403 **h)** Staining examples of oocytes in the different stages of meiosis as observed in KO (Cre<sup>+</sup>) and  
404 control (Cre<sup>-</sup>).

405 **i)** Immunostaining of Ythdf1, Ythdf2 and Ythdf3 in ICR WT oocytes after hormone priming (PMS  
406 & hCG).

407

408 **Figure 2. Mettl3 and Ythdf2 are essential for male mice fertility**

409 **a)** Gross morphology of testis and epididymis of Mettl3<sup>f/f</sup> Vasa-Cre<sup>+</sup> and Mettl3<sup>f/f</sup> Vasa-Cre<sup>-</sup>  
410 males. Cre<sup>+</sup> males show a massive decrease in testis and epididymis size compared to Cre<sup>-</sup>  
411 control.

412 **b)** Number of pups per plug produced by Mettl3<sup>f/f</sup> Vasa-Cre<sup>+</sup> males, compared to Mettl3<sup>f/f</sup> Vasa-  
413 Cre<sup>-</sup> control males. The mothers in both cases were WT. In this case there is a significant  
414 hypofertility of the KO (p<0.0001, Mann-Whitney test).

415 **c)** Gross morphology of testis and epididymis of Mettl3<sup>f/f</sup> Stra8-Cre<sup>+</sup> and Mettl3<sup>f/f</sup> Stra8-Cre<sup>-</sup>  
416 males. Cre<sup>+</sup> males show a reduced-size testis and epididymis compared to Cre<sup>-</sup> control.

417 **d)** Same as in (b), for Stra8-Cre, showing a significant hypofertility of the KO (p<0.0001, Mann-  
418 Whitney test).

419 **e)** Vasa, Stra8 and Prm1 are expressed during spermatogenesis, in different stages, as indicated.

- 420 **f)** Same as in (b), for Prm1-Cre, showing no significant difference between Cre<sup>+</sup> and Cre<sup>-</sup> male  
421 fertility.  
422 **g)** Number of pups per plug produced by Ythdf2<sup>-/-</sup> males, compared to Ythdf2<sup>+/-</sup> control males.  
423 The mothers in both cases were WT. A significant difference between the fertility of KO and  
424 heterozygous males is observed (p<0.0001, Mann-Whitney test).  
425 **h)** Immunostaining of Ythdf1, Ythdf2 and Ythdf3 in seminiferous tubules, showing that each of  
426 the proteins is expressed at different stages of spermatogenesis.

427

#### 428 **Figure . Characterization of Ythdf1-KO, Ythdf2-KO and Ythdf3-KO mice**

- 429 **a)** Left: statistics of KO offspring received from crossing heterozygous mice from each of the  
430 indicated strains (Ythdf1<sup>+/-</sup>, Ythdf2<sup>+/-</sup>, Ythdf3<sup>+/-</sup>). Right: distribution of Ythdf2 WT, HET and KO  
431 offspring in E13.5, two days postnatal (DPN), and 30 DPN (compared to expected ratios).  
432 **b)** Crossing strategy for generating triple-heterozygous mice, which were further crossed, and  
433 their offspring, statistics are presented in panel (c).  
434 **c)** Percentage of genotypes received by crossing triple-heterozygous mice, out of 200 pups tested  
435 30 DPN. Red – observed percentage, grey – expected under null assumption. No pups with  
436 Ythdf2-KO genotype survived 30 DPN. In the Ythdf2<sup>+/-</sup> genotype, pups with KO in either Ythdf1  
437 or Ythdf3 were born at a sub-Mendelian ratio. Chi-square test p-values are indicated.  
438 **d)** H&E staining showing the impaired morphology of triple-KO E7.5 embryos, compared to WT  
439 control.

440

#### 441 **Figure 4. Ythdf1, Ythdf2 and Ythdf3 are redundant in ESCs differentiation**

- 442 **a)** Immunostaining of Ythdf1, Ythdf2, and Ythdf3 in KH2 mESCs, showing a protein expression in  
443 the cytosolic compartment of the cell.  
444 **b)** Cell growth curve of all KO lines and WT control. Cells were grown on mouse feeders, in  
445 serum/LIF conditions.  
446 **c)** Brightfield and immunostaining of Nanog (green), Esrrb (red) and DAPI (blue), in KO cells  
447 (single, triple and Mettl3) and WT control, showing that all cell lines express Nanog and Esrrb.  
448 **d)** Teratomas generated by the KO cell line and by WT control. Single-KO cell lines show all germ  
449 layers, while triple-KO teratomas as poorly differentiated.  
450 **e)** Immunostaining of triple-KO and WT control with Oct4 (red), Foxa (green), Tuj1 (purple) and  
451 DAPI (blue). Triple-KO contains patches of Oct4 staining, unlike WT teratomas.  
452 **f)** Alkaline phosphatase (AP) staining of disassociated teratomas from Triple-KO and WT control,  
453 showing a greater AP staining in the triple-KO cells.  
454 **g)** RT-PCR of pluripotent genes (left) and differentiation genes (right), measured in WT and KO  
455 EBs, and in WT mESCs as a control. In the triple-KO EBs, pluripotent markers are higher than the  
456 control and differentiation markers are lower than the WT control.

457

#### 458 **Figure 5. Triple-KO has a dramatic effect on gene expression**

- 459 **a)** Hierarchical clustering of samples based on Pearson correlations, showing that only single-KO  
460 samples are highly similar to WT.  
461 **b)** Number of differentially expressed genes in each of the KO cell line, compared to WT. Black:  
462 downregulated genes. Grey: upregulated genes

- 463 c) RNA-seq and m<sup>6</sup>A methylation landscape of selected genes. Normalized coverage is presented.  
464 Only Nanog and Dnmt3l are m<sup>6</sup>A-methylated. Dnmt3l, Zscan4a b d & Dppa3 are over-expressed  
465 in triple-KO.  
466 d) Enrichment of upregulated genes in each category, to early embryo genes (Gao et al. 2017b).  
467 Genes that are upregulated in KO of Ythdf1 & 3 are specifically enriched for two-cell genes.  
468 e) Normalized expression of Ythdf1,2 & 3, as measured in early mouse embryo (Gao et al. 2017b).

469  
470

#### 471 **Figure 6. All Ythdf readers interact with Cnot1 and promote mRNA degradation**

- 472 a) Half-life calculated in non-m<sup>6</sup>A genes (grey) and m<sup>6</sup>A-genes (blue), in each of the KO cell lines  
473 and WT control. Only in the Triple-KO and Mettl3-KO are there a significant difference between  
474 the half-life of m<sup>6</sup>A and non-m<sup>6</sup>A genes.  
475 b) Flag Tag coIP of CNOT1 and HSP90 as a control, showing interactions between Ythdf1 2&3 to  
476 CNOT1.  
477 c) LogRatio(KO/WT) distribution of ribosomal genes (n=162), showing a significant increase in  
478 their expression in the single and triple KO. \* p-value < 10<sup>-6</sup> \*\* p-value < 10<sup>-10</sup> (paired Wilcoxon  
479 test).  
480 d) LogRatio(KO/WT) distribution of all genes (n=14,006), showing a non-significant difference in  
481 their expression (p>=0.01, paired Wilcoxon test).

482  
483

## 484 **Supplementary Figure Legends**

485

#### 486 **Figure S1. Generating Ythdf1-KO, Ythdf2-KO and Ythdf3-KO *in vivo* and validation**

- 487 a) Multiple alignments of Ythdf1, Ythdf2 & Ythdf3 proteins, calculated using the Clustal  
488 Omega tool. The area of YTH-domain is highlighted in red. Ythdf1-  
489 Ythdf3 protein sequence similarity is 70.11%, Ythdf1-Ythdf2 is 67.15%, and Ythdf2-Ythdf3  
490 is 67.78%.  
491 b) Phylogenetic tree of the protein sequences of Ythdf1, Ythdf2 and Ythdf3, based on the  
492 UCSC database. The three readers appear together in vertebrates, possibly due to whole  
493 genome duplication.  
494 c) CRISPR-Cas9 targeting strategy for knocking-out Ythdf readers *in vivo*.  
495 d) KO validation using PCR, showing successful primer integration in clones #12 (Ythdf1);  
496 #36, #46 (Ythdf2); #1, #3 & #4 (Ythdf3).

497

#### 498 **Figure S2. Generating conditional knockout mice models**

- 499 a) Targeting strategy for generating Mettl3<sup>f/f</sup> mice.  
500 b) Crossing strategy for generating different Mettl3<sup>f/f</sup> Cre+ mice.

501

#### 502 **Figure S3. Mettl3 is essential for female mice fertility**

- 503 a) *In vitro* fertilization of Mettl3<sup>f/f</sup> Zp3-Cre- control oocytes with WT sperm, leads to creation  
504 of two-cell stage embryos, while the Mettl3<sup>f/f</sup> Zp3-Cre+ oocytes fail to do so.

- 505 b) PCA of transcriptional profile of *Mettl3<sup>f/f</sup>*Zp3-Cre- and *Mettl3<sup>f/f</sup>*Zp3-Cre+ oocytes, showing  
506 a distinct expression pattern.
- 507 c) Differentially expressed genes between *Mettl3<sup>f/f</sup>*Zp3-Cre- and *Mettl3<sup>f/f</sup>*Zp3-Cre+ oocytes,  
508 along with selected enriched categories. m<sup>6</sup>A-methylated genes appear in bold. Ninety-  
509 six genes are upregulated in the KO, and 117 are downregulated in the KO.
- 510 d) RNA-seq landscape of selected differential genes, generated with an IGV browser.  
511 Normalized coverage is presented.

512

513 **Figure S4. *Mettl3* and *Ythdf2* are essential for male mice fertility**

- 514 a) H&E staining showing severe degenerative changes in the seminiferous tubules of  
515 *Mettl3<sup>f/f</sup>*Vasa-Cre+ and lack of sperm in the cauda epididymis.
- 516 b) H&E staining showing mild degenerative changes in the seminiferous tubules of  
517 *Mettl3<sup>f/f</sup>*Stra8-Cre+ and ~75% reduction in sperm quantity in the cauda epididymis,  
518 compared to *Mettl3<sup>f/+</sup>*Stra8-Cre+ sibling control.
- 519 c) H&E staining of seminiferous tubules showing a normal morphology in *Mettl3<sup>f/f</sup>*Prm1-  
520 Cre+ males.
- 521 d) H&E staining showing mild degenerative changes in the seminiferous tubules in *Ythdf2*-  
522 KO males, compared to WT control.
- 523 e) Left: H&E staining in the cauda epididymis, showing severe loss of sperm in *Ythdf2*-KO  
524 compared to control. Right: Brightfield of sperm extracted from the cauda epididymis of  
525 KO and control, showing a severe reduction in normal sperm quantity in the KO sample,  
526 compared to control.
- 527 f) Transcriptional profile of genes that are differentially expressed between *Ythdf2*-KO and  
528 WT round spermatids, along with selected enriched categories. m<sup>6</sup>A-methylated genes  
529 appear in bold; 145 downregulated in KO, and 156 upregulated in KO.

530

531 **Figure S5. *Ythdf1* knockout and *Ythdf3* knockout mice are fertile**

- 532 a) Number of pups per plug produced by mating *Ythdf1*-KO males, compared to *Ythdf1*-  
533 HET males. The mothers in both cases are WT. Here there is no significant difference  
534 between KO and HET male fertility (Mann-Whitney test).
- 535 b) Number of pups per plug produced by mating *Ythdf1*-KO females, compared to *Ythdf1*-  
536 HET females. The fathers in both cases are WT. Here there is no significant difference  
537 between KO and HET female fertility (Mann-Whitney test).
- 538 c) Number of pups per plug produced by mating *Ythdf3*-KO males, compared to *Ythdf3*-  
539 HET males. The mothers in both cases are WT. Here there is no significant difference  
540 between KO and HET male fertility (Mann-Whitney test).
- 541 d) Number of pups per plug produced by mating *Ythdf3*-KO females, compared to *Ythdf3*-  
542 HET females. The fathers in both cases are WT. Here there is no significant difference  
543 between KO and HET female fertility (Mann-Whitney test).
- 544 e) H&E staining of seminiferous tubules showing a normal morphology in *Ythdf1*-KO and  
545 *Ythdf3*-KO males.
- 546 f) The morphology of *Ythdf1*-KO and *Ythdf3*-KO flushed oocytes appears to be normal,  
547 similar to the *Ythdf1*-heterozygous (HET) and *Ythdf3*-HET flushed oocytes.

548

549

550 **Figure S6. Ythdf2 is essential for female mice fertility**

- 551 a) The morphology of Ythdf2-KO flushed oocytes appears to be normal, similar to the WT  
552 flushed oocytes.
- 553 b) Number of pups per plug produced by mating Ythdf2<sup>-/-</sup> females, compared to Ythdf2<sup>+/-</sup>  
554 control females. The fathers in both cases are WT. A significant difference between the  
555 fertility of KO and heterozygous females is observed ( $p < 0.0001$ , Mann-Whitney test).
- 556 c) Transcriptional profile of genes that are differentially expressed between Ythdf2-KO and  
557 WT oocytes, along with selected enriched categories; 311 downregulated in KO, and 339  
558 upregulated in KO.

559

560 **Figure S7. Oocytes staining for Ythdf1, Ythdf2 and Ythdf3**

- 561 a) Immunostaining of Ythdf1, Ythdf2 and Ythdf3 in ICR WT oocytes after hormone priming  
562 (PMS & hCG).
- 563 b) Immunostaining of Ythdf1, Ythdf2 and Ythdf3 in ICR WT oocytes after PMS & HCG -  
564 negative control (NC), without primary antibody.
- 565 c) Immunostaining of Ythdf1, Ythdf2 and Ythdf3 in ICR WT oocytes without hormone  
566 priming.

567

568 **Figure S8. Generation and validation of knockout mESC lines**

- 569 a) CRISPR-Cas9 targeting strategy for knocking out Ythdf readers in mESC cell lines.
- 570 b) Sequencing validation of the single-KO lines.
- 571 c) IGV browser view showing the missing fragments in the KO of Ythdf1, Ythdf2 & Ythdf3.

572

573 **Figure S9. Immunostaining of KO mESC lines**

- 574 a) Immunostaining of Ythdf1 (red), Nanog (green), Oct4 (purple) and DAPI (blue) in WT,  
575 Ythdf1-KO, Triple-KO and Mettl3-KO cells.
- 576 b) Immunostaining of Ythdf2 (red), Nanog (green), Oct4 (purple) and DAPI (blue) in WT,  
577 Ythdf2-KO, Triple-KO and Mettl3-KO cells.
- 578 c) Immunostaining of Ythdf3 (red), Nanog (green), Oct4 (purple) and DAPI (blue) in WT,  
579 Ythdf3-KO, Triple-KO and Mettl3-KO cells.

580

581 **Figure S10. Morphology of knockout mESC lines**

- 582 a) Phase and alkaline phosphatase (AP) staining of WT, single-KOs and Triple-KO mESCs,  
583 and phases of their EBs.

584

585 **Figure S11. Overlap of ESC signatures**

- 586 a) PCA clustering of KO and WT mESCs samples, showing that in PC1, single reader KO  
587 samples are closer to WT, compared to triple-KO and Mettl3-KO.
- 588 b) Overlap between upregulated gene signatures, measured in Ythdf single-KO and triple-  
589 KO, and in Mettl3-KO. Genes that are m<sup>6</sup>A-methylated are bold. Genes that are two-cell  
590 markers are highlighted in red.

591

592 **Figure S12. CLIP data evaluation**

- 593 a) Targets of Ythdf1, Ythdf2 and Ythdf3 highly overlap targets that were published before  
594 in human cancer cell lines.  
595 b) Sequence logo of the GGACT containing motif which appears in 14% of YTHDF targets  
596 (enrichment fold-change 1.89,  $p < 1e-24$ ).  
597 c) Distribution of Ythdf peaks in various genomic entities, showing that the three readers  
598 have a tendency to bind 3' UTR, particularly Ythdf2.  
599 d) Significant overlap of Ythdf targets, with m<sup>6</sup>a-methylated genes.  
600 e) Significant overlap between Ythdf1, Ythdf2 and Ythdf3 targets  
601 f) Enrichment of Ythdf targets that were identified in mESCs, to early embryo genes (Gao  
602 et al. 2017), showing significant overlap with blastocyte genes.  
603

### 604 **Figure S13. Half-life as a function of number of m<sup>6</sup>A peaks**

- 605 a) The half-life of m<sup>6</sup>A genes is plotted as a function of m<sup>6</sup>A peak number in the transcript,  
606 showing a slight yet significant decrease in half-life (shorter), as the number of m<sup>6</sup>A  
607 peaks increase.  
608 b) Distribution of translation efficiencies of gene groups in the different samples (bottom).  
609 Showing that m<sup>6</sup>a-methylated genes and Ythdf targets are translated in a higher  
610 efficiency, consistently across samples, compared to non-methylated genes (\*\*  $p < 1e-15$ ,  
611 \*  $p < 1e-6$ , Kolmogorov-Smirnov test). Mettl3 and Ythdf KO hardly affect translation  
612 efficiency.  
613  
614

## 615 **Supplementary Table Legends**

616  
617 **Table S1.** Differentially expressed genes in gametogenesis KO experiments: Mettl3-KO  
618 oocytes, and Ythdf2-KO oocytes and spermatoids, compared to matched controls.  
619

620 **Table S2.** Differentially expressed genes in mESCs, that carry a single-KO (Ythdf1, Ythdf2,  
621 Ythdf3 or Mettl3) or triple-KO (Ythdf1/2/3), compared to WT controls.  
622

623 **Table S3.** eCLIP binding targets of Ythdf1, Ythdf2 and Ythdf3, measured in mESCs.  
624

625 **Table S4.** Normalized expressed along with transcript half-life, calculated for each gene  
626 in the single-KO (Ythdf1, Ythdf2, Ythdf3), triple-KO Ythdf1/2/3, and WT control.  
627  
628

## 629 **Bibliography**

- 630  
631 Bailey AS, Batista PJ, Gold RS, Grace Chen Y, de Rooij DG, Chang HY, Fuller MT. 2017. The  
632 conserved RNA helicase YTHDC2 regulates the transition from proliferation to  
633 differentiation in the germline. *Elife* **6**: E26116.  
634 Dominissini D, Moshitch-Moshkovitz S, Schwartz S, Salmon-Divon M, Ungar L, Osenberg S,  
635 Cesarkas K, Jacob-Hirsch J, Amariglio N, Kupiec M, et al. 2012. Topology of the human and



- 636 mouse m6A RNA methylomes revealed by m6A-seq. *Nature* **485**: 201–206.  
637 <http://www.ncbi.nlm.nih.gov/pubmed/22575960> (Accessed September 24, 2019).
- 638 Du H, Zhao Y, He J, Zhang Y, Xi H, Liu M, Ma J, Wu L. 2016. YTHDF2 destabilizes m6A-containing  
639 RNA through direct recruitment of the CCR4-NOT deadenylase complex. *Nat Commun* **7**:  
640 12626.
- 641 Gao LL, Zhou CX, Zhang XL, Liu P, Jin Z, Zhu GY, Ma Y, Li J, Yang ZX, Zhang D. 2017a. ZP3 is  
642 Required for Germinal Vesicle Breakdown in Mouse Oocyte Meiosis. *Sci Rep* **7**: 41272.
- 643 Gao Y, Liu X, Tang B, Li C, Kou Z, Li L, Liu W, Wu Y, Kou X, Li J, et al. 2017b. Protein Expression  
644 Landscape of Mouse Embryos during Pre-implantation Development. *Cell Rep* **21**: 3957–  
645 3969.
- 646 Garcia-Campos MA, Edelheit S, Toth U, Safra M, Shachar R, Viukov S, Winkler R, Nir R, Lasman L,  
647 Brandis A, et al. 2019. Deciphering the “m6A Code” via Antibody-Independent Quantitative  
648 Profiling. *Cell* **178**: 731–747.
- 649 Geula S, Moshitch-Moshkovitz S, Dominissini D, Mansour AA, Kol N, Salmon-Divon M,  
650 Hershkovitz V, Peer E, Mor N, Manor YS, et al. 2015. m<sup>6</sup>A mRNA methylation facilitates  
651 resolution of naïve pluripotency toward differentiation. *Science* (80- ) **347**.
- 652 Hartmann AM, Nayler O, Schwaiger FW, Obermeier A, Stamm S. 1999. The interaction and  
653 colocalization of Sam68 with the splicing-associated factor YT521-B in nuclear dots is  
654 regulated by the Src family kinase p59(fyn). *Mol Biol Cell* **10**: 3909–26.
- 655 Heck AM, Wilusz CJ. 2019. Small changes, big implications: The impact of m6A RNA methylation  
656 on gene expression in pluripotency and development. *Biochim Biophys Acta - Gene Regul*  
657 *Mech* **1862**: 194402.
- 658 Hsu PJ, Zhu Y, Ma H, Guo Y, Shi X, Liu Y, Qi M, Lu Z, Shi H, Wang J, et al. 2017. Ythdc2 is an N6 -  
659 methyladenosine binding protein that regulates mammalian spermatogenesis. *Cell Res* **27**:  
660 1115–1127.
- 661 Huang T, Liu Z, Zheng Y, Feng T, Gao Q, Zeng W. 2020. YTHDF2 promotes spermatogonial  
662 adhesion through modulating MMPs decay via m6A / mRNA pathway. *Cell Death Dis* **11**:  
663 37.
- 664 Ivanova I, Much C, Di Giacomo M, Azzi C, Morgan M, Moreira PN, Monahan J, Carrieri C, Enright  
665 AJ, O’Carroll D. 2017. The RNA m6A Reader YTHDF2 Is Essential for the Post-transcriptional  
666 Regulation of the Maternal Transcriptome and Oocyte Competence. *Mol Cell* **67**: 1059–  
667 1067.
- 668 Jain D, Puno MR, Meydan C, Lailier N, Mason CE, Lima CD, Anderson K V., Keeney S. 2018. Ketu  
669 mutant mice uncover an essential meiotic function for the ancient RNA helicase YTHDC2.  
670 *Elife* **7**: E30919.
- 671 Jia G, Fu Y, Zhao X, Dai Q, Zheng G, Yang Y, Yi C, Lindahl T, Pan T, Yang YG, et al. 2011. N6-  
672 Methyladenosine in nuclear RNA is a major substrate of the obesity-associated FTO. *Nat*  
673 *Chem Biol* **7**: 885–7.
- 674 Kan L, Grozhik A V., Vedanayagam J, Patil DP, Pang N, Lim KS, Huang YC, Joseph B, Lin CJ, Despic  
675 V, et al. 2017. The m6A pathway facilitates sex determination in Drosophila. *Nat Commun*  
676 **8**: 15737.
- 677 Kasowitz SD, Ma J, Anderson SJ, Leu NA, Xu Y, Gregory BD, Schultz RM, Wang PJ. 2018. Nuclear  
678 m6A reader YTHDC1 regulates alternative polyadenylation and splicing during mouse  
679 oocyte development. *PLoS Genet* **14**: e1007412.

- 680 Lasman, L, Hanna, JH, Novershtern N. 2020. Role of m6A in Embryonic Stem Cell Differentiation  
681 and in Gametogenesis. *Epigenomes* **4**.
- 682 Lee H, Bao S, Qian Y, Geula S, Leslie J, Zhang C, Hanna JH, Ding L. 2019. Stage-specific  
683 requirement for Mettl3-dependent m6A mRNA methylation during haematopoietic stem  
684 cell differentiation. *Nat Cell Biol* **21**: 700–709.
- 685 Li A, Chen YS, Ping XL, Yang X, Xiao W, Yang Y, Sun HY, Zhu Q, Baidya P, Wang X, et al. 2017.  
686 Cytoplasmic m6A reader YTHDF3 promotes mRNA translation. *Cell Res*.
- 687 Li M, Zhao X, Wang W, Shi H, Pan Q, Lu Z, Perez SP, Suganthan R, He C, Bjørås M, et al. 2018.  
688 Ythdf2-mediated m6A mRNA clearance modulates neural development in mice. *Genome*  
689 *Biol* **19**: 69.
- 690 Lin Z, Hsu PJ, Xing X, Fang J, Lu Z, Zou Q, Zhang KJ, Zhang X, Zhou Y, Zhang T, et al. 2017. Mettl3-  
691 /Mettl14-mediated mRNA N6-methyladenosine modulates murine spermatogenesis. *Cell*  
692 *Res* **27**: 1216–1230.
- 693 Liu J, Yue Y, Han D, Wang X, Fu Y, Zhang L, Jia G, Yu M, Lu Z, Deng X, et al. 2014. A METTL3-  
694 METTL14 complex mediates mammalian nuclear RNA N6-adenosine methylation. *Nat*  
695 *Chem Biol* **10**: 93–5.
- 696 Meyer KD, Saletore Y, Zumbo P, Elemento O, Mason CE, Jaffrey SR. 2012. Comprehensive  
697 analysis of mRNA methylation reveals enrichment in 3' UTRs and near stop codons. *Cell*  
698 **149**: 1635–46.
- 699 Niu Y, Zhao X, Wu YS, Li MM, Wang XJ, Yang YG. 2013. N6-methyl-adenosine (m6A) in RNA: An  
700 Old Modification with A Novel Epigenetic Function. *Genomics, Proteomics Bioinforma* **11**:  
701 8–17.
- 702 O'Donnell L, O'Bryan MK. 2014. Microtubules and spermatogenesis. *Semin Cell Dev Biol* **30**: 45–  
703 54.
- 704 Patil DP, Chen CK, Pickering BF, Chow A, Jackson C, Guttman M, Jaffrey SR. 2016. M6A RNA  
705 methylation promotes XIST-mediated transcriptional repression. *Nature* **537**: 369–373.
- 706 Patil DP, Pickering BF, Jaffrey SR. 2018. Reading m6A in the Transcriptome: m6A-Binding  
707 Proteins. *Trends Cell Biol* **28**: 113–127.
- 708 Pervaiz N, Shakeel N, Qasim A, Zehra R, Anwar S, Rana N, Xue Y, Zhang Z, Bao Y, Abbasi AA.  
709 2019. Evolutionary history of the human multigene families reveals widespread gene  
710 duplications throughout the history of animals. *BMC Evol Biol* **19**: 128.
- 711 Schwartz S, Agarwala SD, Mumbach MR, Jovanovic M, Mertins P, Shishkin A, Tabach Y,  
712 Mikkelsen TS, Satija R, Ruvkun G, et al. 2013. High-Resolution mapping reveals a  
713 conserved, widespread, dynamic mRNA methylation program in yeast meiosis. *Cell* **155**:  
714 1409–21.
- 715 Shi H, Wang X, Lu Z, Zhao BS, Ma H, Hsu PJ, Liu C, He C. 2017. YTHDF3 facilitates translation and  
716 decay of N6-methyladenosine-modified RNA. *Cell Res* **27**: 315–328.
- 717 Shi H, Zhang X, Weng YL, Lu Z, Liu Y, Lu Z, Li J, Hao P, Zhang Y, Zhang F, et al. 2018. m6A  
718 facilitates hippocampus-dependent learning and memory through YTHDF1. *Nature* **563**:  
719 249–253.
- 720 Stern-Ginossar N, Weisburd B, Michalski A, Le VTK, Hein MY, Huang SX, Ma M, Shen B, Qian SB,  
721 Hengel H, et al. 2012. Decoding human cytomegalovirus. *Science (80- )* **338**: 1088–93.
- 722 Storm MP, Kumpfmüller B, Thompson B, Kolde R, Vilo J, Hummel O, Schulz H, Welham MJ.  
723 2009. Characterization of the phosphoinositide 3-kinase-dependent transcriptome in

724 murine embryonic stem cells: Identification of novel regulators of pluripotency. *Stem Cells*  
725 **27**: 764–75.

726 Tang C, Klukovich R, Peng H, Wang Z, Yu T, Zhang Y, Zheng H, Klungland A, Yan W. 2017.  
727 ALKBH5-dependent m6A demethylation controls splicing and stability of long 3'-UTR  
728 mRNAs in male germ cells. *Proc Natl Acad Sci U S A* **115**: E325–E333.

729 Van Nostrand EL, Pratt GA, Shishkin AA, Gelboin-Burkhart C, Fang MY, Sundararaman B, Blue  
730 SM, Nguyen TB, Surka C, Elkins K, et al. 2016. Robust transcriptome-wide discovery of RNA-  
731 binding protein binding sites with enhanced CLIP (eCLIP). *Nat Methods* **13**: 508–14.

732 Wang X, Lu Z, Gomez A, Hon GC, Yue Y, Han D, Fu Y, Parisien M, Dai Q, Jia G, et al. 2014. N 6-  
733 methyladenosine-dependent regulation of messenger RNA stability. *Nature* **505**: 117–20.

734 Wang X, Zhao BS, Roundtree IA, Lu Z, Han D, Ma H, Weng X, Chen K, Shi H, He C. 2015. N6-  
735 methyladenosine modulates messenger RNA translation efficiency. *Cell* **161**: 1388–99.

736 Wang Y, Li Y, Yue M, Wang J, Kumar S, Wechsler-Reya RJ, Zhang Z, Ogawa Y, Kellis M, Duester G,  
737 et al. 2018. N 6-methyladenosine RNA modification regulates embryonic neural stem cell  
738 self-renewal through histone modifications. *Nat Neurosci* **21**: 195–206.

739 Wei J, Liu F, Lu Z, Fei Q, Ai Y, He PC, Shi H, Cui X, Su R, Klungland A, et al. 2018. Differential m 6  
740 A, m 6 A m , and m 1 A Demethylation Mediated by FTO in the Cell Nucleus and Cytoplasm.  
741 *Mol Cell* **71**: 973–985.

742 Wojtas MN, Pandey RR, Mendel M, Homolka D, Sachidanandam R, Pillai RS. 2017. Regulation of  
743 m 6 A Transcripts by the 3'→5' RNA Helicase YTHDC2 Is Essential for a Successful Meiotic  
744 Program in the Mammalian Germline. *Mol Cell*.

745 Xia H, Zhong C, Wu X, Chen J, Tao B, Xia X, Shi M, Zhu Z, Trudeau VL, Hu W. 2018. Mettl3  
746 mutation disrupts gamete maturation and reduces fertility in zebrafish. *Genetics*.

747 Xu K, Yang Y, Feng GH, Sun BF, Chen JQ, Li YF, Chen YS, Zhang XX, Wang CX, Jiang LY, et al. 2017.  
748 Mettl3-mediated m 6 A regulates spermatogonial differentiation and meiosis initiation.  
749 *Cell Res* **27**: 1100–1114.

750 Zheng G, Dahl JA, Niu Y, Fedorcsak P, Huang CM, Li CJ, Våggbø CB, Shi Y, Wang WL, Song SH, et  
751 al. 2013. ALKBH5 Is a Mammalian RNA Demethylase that Impacts RNA Metabolism and  
752 Mouse Fertility. *Mol Cell* **49**: 18–29.

753  
754  
755  
756  
757  
758  
759  
760  
761  
762  
763  
764  
765  
766  
767

## 768 Materials and Methods

|     |                                                                                          |    |
|-----|------------------------------------------------------------------------------------------|----|
| 769 |                                                                                          |    |
| 770 |                                                                                          |    |
| 771 | Stem cell lines and cell culture .....                                                   | 20 |
| 772 | Generation of Ythdf1, Ythdf2 and Ythdf3 knock-out murine ESC lines via CRISPR/Cas9 ..... | 21 |
| 773 | Generation of Ythdf1, Ythdf2 and Ythdf3 knock-out mouse strains via CRISPR/Cas9 .....    | 21 |
| 774 | Generation of Mettl3 conditional-knockout mouse model .....                              | 22 |
| 775 | Generation of Mettl3 <sup>flox/flox</sup> Cre+ knock-out mice .....                      | 22 |
| 776 | Western blot analysis .....                                                              | 22 |
| 777 | Real Time (RT)-PCR analysis .....                                                        | 23 |
| 778 | Embryoid bodies and teratoma formation .....                                             | 24 |
| 779 | Histology .....                                                                          | 24 |
| 780 | Oocyte isolation and immunostaining .....                                                | 24 |
| 781 | Flushing oocytes .....                                                                   | 25 |
| 782 | Poking ovaries .....                                                                     | 25 |
| 783 | Immunofluorescence staining .....                                                        | 25 |
| 784 | Alkaline phosphatase (AP) staining .....                                                 | 26 |
| 785 | Tetra complementation (4n) of mouse embryo .....                                         | 26 |
| 786 | RNA stability assay .....                                                                | 26 |
| 787 | Male Germ cell isolation .....                                                           | 26 |
| 788 | RNA-seq library preparation .....                                                        | 26 |
| 789 | SMART-seq2 library preparation .....                                                     | 27 |
| 790 | Ribosome profiling & analysis .....                                                      | 27 |
| 791 | 3' Poly A- RNA-sequencing Analysis .....                                                 | 27 |
| 792 | mRNA Half-Life Calculation .....                                                         | 28 |
| 793 | RNA-Seq analysis .....                                                                   | 28 |
| 794 | Enrichment analysis .....                                                                | 29 |
| 795 | CLIP protocol & CLIP Analysis .....                                                      | 29 |

796  
797

### 798 Stem cell lines and cell culture

799 Maintenance of WT or Mutant murine ESCs was conducted as described previously (**Geula et al.**  
800 **2015**). Briefly, mESCs expansion was carried out in 500 mL of High-glucose DMEM  
801 (ThermoScientific), 15% USDA certified fetal bovine serum (FBS - Biological Industries), 1 mM L-  
802 Glutamine (Biological Industries), 1% nonessential amino acids (Biological Industries), 0.1 mM  $\beta$ -  
803 mercaptoethanol (Sigma), 1% penicillin-streptomycin (Biological Industries), 1% Sodium-  
804 Pyruvate (Biological Industries), 10 $\mu$ g recombinant human LIF (Peprotech). Cells were maintained  
805 in 20% O<sub>2</sub> conditions on irradiation inactivated mouse embryonic fibroblast (MEF) feeder cells,  
806 and were passaged following 0.25% trypsinization. For RNA extraction, cells were grown on  
807 Gelatin for three passages in FBS free N2B27-based media (**Gafni et al. 2013**). Briefly, 500mL of  
808 N2B27 media was produced by including: 250 mL DMEM:F12 (ThermoScientific), 250 mL  
809 Neurobasal (ThermoScientific), 5 mL N2 supplement (Invitrogen; 17502048 or in-house  
810 prepared), 5 mL B27 supplement (Invitrogen; 17504044), 1 mM L-Glutamine (Biological  
811 Industries), 1% nonessential amino acids (Biological Industries), 0.1 mM  $\beta$ -mercaptoethanol  
812 (Sigma), penicillin-streptomycin (Biological Industries). Naïve conditions for murine ESCs included

813 10µg recombinant human LIF (Peprotech) and small-molecule inhibitors CHIR99021 (CH, 3 µM-  
814 Axon Medchem) and PD0325901 (PD, 1 µM - Axon Medchem) termed 2i.

815

### 816 Generation of Ythdf1, Ythdf2 and Ythdf3 knock-out murine ESC lines via 817 CRISPR/Cas9

818 In order to knock out the Ythdf genes in mES cells, oligos for gRNAs were cloned into px335 vector  
819 (Addgene#42335 encoding SpCas9 nickase. A pair of unique gRNA sequences for each gene were  
820 chosen with the help of the Zhang Lab website <http://www.genome-engineering.org/crispr> so  
821 that to leave 20-30bp offset between the CRISPR target sites. 100 µg of resulting constructs and  
822 10 µg of GFP expressing vector were electroporated into V6.5 mESCs. 3 days later, GFP expressing  
823 cells were sorted by FACS and seeded at low density. 9 days after seeding, colonies were picked  
824 and their DNA was analyzed by High Resolution Melt assay (HRM) using MeltDoctor reagent (Life  
825 Technologies). The clones that showed reduced T<sub>m</sub> for the targeted locus were expanded and  
826 sequenced to confirm mutations.

827

828 gRNA list for knocking out ythdf genes in mES cells:

829

| Name          | Targeting site     | Sequence             |
|---------------|--------------------|----------------------|
| mYTHDF1 gRNA1 | 5' region of Exon4 | attccttactccctcagcg  |
| mYTHDF1 gRNA2 | 5' region of Exon4 | ggatagtaactggacaggta |
| mYTHDF2 gRNA1 | Exon3              | cttacttgagccacaggca  |
| mYTHDF2 gRNA2 | Exon3              | acagaaccattttgtactag |
| mYTHDF3 gRNA1 | 5' region of Exon4 | attggattccatattctct  |
| mYTHDF3 gRNA2 | 5' region of Exon4 | atatatggatctgacattgg |

830

831

### 832 Generation of Ythdf1, Ythdf2 and Ythdf3 knock-out mouse strains via CRISPR/Cas9

833 The gRNA sequences were designed with the help of the Zhang Lab website [http://www.genome-](http://www.genome-engineering.org/crispr)  
834 [engineering.org/crispr](http://www.genome-engineering.org/crispr). For Ythdf1 and Ythdf3 genes single gRNAs were chosen targeting exon3.  
835 For Ythdf2 gene, we have designed a pair of gRNAs flanking exon4. The deletion of this exon  
836 creates out-of-frame mutation in the coding sequence.

837 Targeting Ythdf genes in mouse single cell embryos was performed as described in (Yang et al.  
838 **2014**).

839 Briefly, Cas9 and respective gRNA coding sequences tagged with T7 promoter were transcribed  
840 using mMACHINE T7 ULTRA kit and MEGA shortscript T7 kit, then purified with MEGA  
841 clear kit (all the kits were from Thermo Fisher Scientific). CB6F1 (C57BL/6 × BALB/c) and ICR mice  
842 strains were used as embryo donors and foster mothers, respectively. Superovulated CB6F1 mice  
843 (8-10 weeks old) were mated to CB6F1 stud males, and fertilized embryos were collected from  
844 oviducts. Cas9 mRNAs and sgRNA (50 ng/µl) was injected into the cytoplasm of fertilized eggs  
845 with well recognized pronuclei in M2 medium (Sigma). The injected zygotes were cultured in  
846 KSOM with amino acids (Sigma) at 37°C under 5% CO<sub>2</sub> in air until blastocyst stage by 3.5 days.  
847 Thereafter, 15–25 blastocysts were transferred into uterus of pseudopregnant ICR females at 2.5  
848 days post coitum (dpc). Mutated animals were screened for deletions by sequencing the targeted

849 loci. *Ythdf*<sup>+/-</sup> animal were backcrossed with C57BL/6 mice for 2 generations before mating in  
850 order to generate *Ythdf*<sup>-/-</sup> knockout mice.

851

852 gRNAs for knocking out *ythdf* genes in mice:

853

| Name             | Targeting site | Sequence             |
|------------------|----------------|----------------------|
| mYhdf1 CRISPR    | Exon3          | ATTGGACTGTCCAGAAAGGT |
| mYhdf2 5' CRISPR | Intron34       | GTAAATTTTAGGACTACGGT |
| mYhdf2 3' CRISPR | Intron45       | GTAAATTTTAGGACTACGGT |
| mYhdf3 CRISPR    | Exon3          | TTTGCTGGCTACTTAAGTA  |

854

### 855 Generation of *Mettl3* conditional-knockout mouse model

856 Stem cell lines and mice deficient for *Mettl3* were generated by targeted disruption of the  
857 endogenous *Mettl3* locus via homologous recombination. The targeting strategy and construct  
858 Knockout Mouse Project repository (*Mettl3*:tm1a(KOMP)Wtsi) introduced loxP sites spanning  
859 the fourth exon that would result in an out-of-frame and truncated product upon deletion and  
860 introduced a LacZ reporter cassette driven by the endogenous *Mettl3* promoter. 50µg DNA of  
861 the targeting construct was linearized and electroporated into V6.5 ESC line that were then  
862 subjected to selection with G418 (300microg/ml) After 10 d of selection, resistant clones were  
863 analyzed for correct targeting. *Mettl3* f/f floxed ESC were injected to BDF1 host blastocyst and  
864 chimeric mice were generated. Chimeric male mice were mated with C57BL/6 females. F1  
865 offspring were screened for germline transmission by agouti coat color and validation via PCR of  
866 LacZ transgene reporter. In order to remove Neomycin and lacz cassette F1 offspring were mated  
867 with Rosa26-FlpE mice (Jackson Laboratory Stock#: 003946) and offspring pups were validated  
868 for the removal of LacZ transgene. The mice were crossed to C57BL/6 for 3 generations before  
869 used for any experiment.

870

### 871 Generation of *Mettl3*<sup>flox/flox</sup> Cre+ knock-out mice

872 Cre+ mice were crossed with *Mettl3*<sup>flox/flox</sup> mice to generate *Mettl3*<sup>flox/flox</sup> Cre+ mice, as detailed  
873 in **figure S2b**. The following Cre mice were used: PRM1-Cre (Jax#003328), Stra8-Cre  
874 (Jax#017490), Vasa-Cre (Jax#006954) and ZP3-cre+ (Jax#003651).

875

### 876 Western blot analysis

877 Cells were harvested, and whole cell protein was extracted by lysis buffer, containing 150 mM  
878 NaCl, 150 mM Tris-Hcl (PH = 7.4), 0.5% NP40, 1.5 mM MgCl<sub>2</sub>, 10% Glycerol. Protein's  
879 concentration was determined by BCA Kit (ThermoScientific). SDS/PAGE was performed  
880 according to Laemmli and transferred to nitrocellulose membranes for immunostaining.  
881 Membranes containing the transferred proteins were blocked with 5% (w/v) non-fat dried  
882 skimmed milk powder in PBST, and then incubated with primary antibody in 5% BSA in PBST  
883 (overnight, 4°C). Secondary antibodies used were Peroxide-conjugated AffiniPure goat anti-  
884 rabbit (1:10,000, 111-035-003; Jackson ImmunoResearch). Blots were developed using  
885 SuperSignal West Pico Chemiluminescent substrate (ThermoScientific, #34080). The following

886 primary antibodies were used: Ythdf2 (AVIVA SYSTEMS BIOLOGY, ARP67917\_P050), Ythdf3  
 887 (Santa Cruz, SC-87503), Cnot1 (Proteintech, 14276-1-A) and Hsp90 (Epitomics, 1492-1).

888

### 889 Real Time (RT)-PCR analysis

890 Total RNA was extracted from the cells using Trizol. 1 µg of RNA was then reverse transcribed  
 891 using High-Capacity cDNA Reverse Transcription Kit (Applied Biosystems). Quantitative PCR was  
 892 performed with 10ng of cDNA, in triplicates, on Vii7 platform (Applied Biosystems), using Fast  
 893 SYBR® Master Mix (Applied Biosystems). Error bars indicate standard deviation of triplicate  
 894 measurements for each measurement. The primers used for amplification are indicated in the  
 895 primers table.

896

897 Primers list:

898

| #  | Primer Name     | Sequence                             | Primer Purpose            |
|----|-----------------|--------------------------------------|---------------------------|
| 1  | Ythdf1-WT F     | TAGGGAAACCCTGGGTTCCGGTC              | Genotype Ythdf1-WT mice   |
| 2  | Ythdf1-WT R     | CGGATTGGACTGTCCAGAAAGGTAG            | Genotype Ythdf1-WT mice   |
| 3  | Ythdf1-KO F     | TAGGGAAACCCTGGGTTCCGGTC              | Genotype Ythdf1-KO mice   |
| 4  | Ythdf1-KO R     | CGGATTGGACTGTAGGGCTCAAAG             | Genotype Ythdf1-KO mice   |
| 5  | Ythdf2-WT F     | AACTAGCAGCCCAGAAGGTTAAGCAGTTCAGTTATC | Genotype Ythdf2-WT mice   |
| 6  | Ythdf2-WT R     | GGGTGCATAAGCGTAATTGCTACTATATCC       | Genotype Ythdf2-WT mice   |
| 7  | Ythdf2-KO F     | TGATCACCTGAACCTCACCTATACAAAACCT      | Genotype Ythdf2-KO mice   |
| 8  | Ythdf2-KO R     | GCCAGCCCCAATTAATACTGTCTATAACT        | Genotype Ythdf2-KO mice   |
| 9  | Ythdf3-WT F     | CAAGGTTAGCCTGGGTTACAGAAGAAA          | Genotype Ythdf3-WT mice   |
| 10 | Ythdf3-WT R     | CTGATTGTCTGGCTACTTAAGTATGGCTC        | Genotype Ythdf3-WT mice   |
| 11 | Ythdf3-KO F     | CAAGGTTAGCCTGGGTTACAGAAGAAA          | Genotype Ythdf3-KO mice   |
| 12 | Ythdf3-KO R     | TTACCTGATTGTATGGCTCAAAATCATC         | Genotype Ythdf3-KO mice   |
| 13 | Mettl3 5'flox F | GTTGATGAAATTATCAGTACAATGGTTCTGA      | Genotype Mettl3 Flox mice |
| 14 | Mettl3 5'flox R | GTAAAGAACAACCTCTGGTTATCGTCATCG       | Genotype Mettl3 Flox mice |
| 15 | Prm Cre F       | GCGGTCTGGCAGTAAAACTATC               | Genotype Prm1 Cre mice    |
| 16 | Prm Cre R       | GTGAAACAGCATTGCTGTCACTT              | Genotype Prm1 Cre mice    |
| 17 | Stra8 Cre F     | AGATGCCAGGACATCAGGAACCTG             | Genotype Star8 Cre mice   |
| 18 | Stra8 Cre R     | ATCAGCCACACCAGACACAGAGATC            | Genotype Star8 Cre mice   |
| 19 | Vasa Cre F      | CACGTGCAGCCGTTTAAGCCGCGT             | Genotype Vasa Cre mice    |
| 20 | Vasa Cre R      | TTCCATTCTAAACAACACCCTGAA             | Genotype Vasa Cre mice    |
| 21 | Zp3 Cre F       | GCGGTCTGGCAGTAAAACTATC               | Genotype ZP3 Cre mice     |
| 22 | Zp3 Cre R       | GTGAAACAGCATTGCTGTCACTT              | Genotype ZP3 Cre mice     |
| 23 | Oct4 F          | AGAGGATCACCTTGGGGTACA                | Real Time PCR             |
| 24 | Oct4 R          | CGAAGCGACAGATGGTGGTC                 | Real Time PCR             |
| 25 | Nanog F         | CTCAAGTCCTGAGGCTGACA                 | Real Time PCR             |
| 26 | Nanog R         | TGAAACCTGTCTTGAGTGC                  | Real Time PCR             |
| 27 | Sox2 F          | TAGAGCTAGACTCCGGGCGATGA              | Real Time PCR             |
| 28 | Sox2 R          | TTGCCTTAAACAAGACCACGAAA              | Real Time PCR             |
| 29 | Klf4 F          | GCACACCTGCGAACTCACAC                 | Real Time PCR             |
| 30 | Klf4 R          | CCGTCCCAGTCACAGTGGTAA                | Real Time PCR             |
| 31 | Pax6 F          | CGGGACTTCAGTACCAGGG                  | Real Time PCR             |

|    |          |                                  |               |
|----|----------|----------------------------------|---------------|
| 32 | Pax6 R   | CTTCATCCGAGTCTTCTCCG             | Real Time PCR |
| 33 | Fgf5 F   | CAAAGTCAATGGCTCCCACGAAG          | Real Time PCR |
| 34 | Fgf5 R   | CTACAATCCCCTGAGACACAGCAAATA      | Real Time PCR |
| 35 | Gata6 F  | CTTGCGGGCTCTATATGAACTCCAT        | Real Time PCR |
| 36 | Gata6 R  | TAGAAGAAGAGGAAGTAGGAGTCATAGGGACA | Real Time PCR |
| 37 | Sox17 F  | GCCAAAGACGAACGCAAGCG             | Real Time PCR |
| 38 | Sox17 R  | TTCTCTGCCAAGGTCAACGCCT           | Real Time PCR |
| 39 | Gata4 F  | CACAAGATGAACGGCATCAACC           | Real Time PCR |
| 40 | Gata4 R  | CAGCGTGGTGGTAGTCTG               | Real Time PCR |
| 41 | Otx2 F   | CTTCGGGTATGGACTTGCTG             | Real Time PCR |
| 42 | Otx2 R   | CCTCATGAAGATGTCTGGGTAC           | Real Time PCR |
| 43 | Gapdh F  | AGTCAAGGCCGAGAATGGGAAG           | Real Time PCR |
| 44 | Gapdh R  | AAGCAGTTGGTGGTGCAGGATG           | Real Time PCR |
| 45 | Actinb F | TTCTTTGCAGCTCCTTCGTT             | Real Time PCR |
| 46 | Actinb R | ATGGAGGGGAATACAGCCC              | Real Time PCR |

899

## 900 Embryoid bodies and teratoma formation

901 For embryoid body (EB) *in vitro* differentiation assay,  $5 \times 10^6$  ESCs were disaggregated with trypsin  
902 and transferred to non-adherent suspension culture dishes, and cultured in MEF medium (DMEM  
903 supplemented with 1% L-Glutamine, 1% Non-essential amino acids, 1% penicillin-streptomycin,  
904 1% Sodium-Pyruvate and 15% FBS, doesn't contain Lif or 2i) for 8-10 days (time points were  
905 always matched with control cells). Media replacement was carried out every 2 days.

906 For teratoma formation,  $5 \times 10^6$  ESCs were injected subcutaneously to the flanks of immune  
907 deficient NSG mice. After 4-6 weeks, all injected mice were sacrificed and the tumor mass  
908 extracted and fixed in 4% para-formaldehyde over-night. Slides were prepared from the paraffin  
909 embedded fixed tissues, which were next Hematoxylin & Eosin stained and inspected for  
910 representation of all three germ layers.

911

## 912 Histology

913 Ovaries and testis were fixed overnight in 4% PFA overnight at 4°C. The fixed tissues were washed  
914 with 25%, 50%, and 70% ethanol, embedded in paraffin, and sectioned in 4 µm thickness.

915

## 916 Oocyte isolation and immunostaining

917 Female mice (5-8-week old ICR) were injected with 5 i.u. of pregnant mare serum gonadotropin  
918 (PMSG) (Sigma), followed by injection of 5 i.u. of human chorionic gonadotrophin (hCG) (Sigma)  
919 46 hours later. Mouse oocytes were extracted from the oviduct by flushing the oviduct with M2  
920 media 24 hours after hCG injection. Somatic cells were removed from the oocytes by gentle  
921 pipetting in M2 media supplemented with hyaluronidase (Sigma). Oocytes were transferred to  
922 an embryological watch-glass and fixed with 4% PFA EM grade (Electron Microscopy Sciences) in  
923 PBS at 4°C over-night. Next, oocytes were washed 3 times in PBS (5 minutes each), permeabilized  
924 in PBS with 0.3% Triton X-100 for 30 minutes, blocked with 2% normal donkey serum/0.1%  
925 BSA/0.01% Tween-20 in PBS for 1 hour at room temperature (RT), and incubated over-night at  
926 4°C with primary antibodies diluted in blocking solution. Oocytes were rinsed 3 times for 15  
927 minutes each in blocking solution, incubated for 1 hour at room temperature with secondary



928 antibodies diluted 1:500 in blocking solution, counterstained with DAPI (1  $\mu\text{g}/\text{ml}$  in PBS) for 5  
929 minutes, and washed with PBS/0.01% Tween-20 for 5 minutes 3 times. Finally, oocytes were  
930 mounted in 96 well glass bottom plates for confocal imaging. The following primary antibodies  
931 were used: Mouse monoclonal anti-acetylated  $\alpha$ -Tubulin (Santa Cruz; sc-23950), Ythdf1  
932 (Proteintech, 17479-1-AP), Ythdf2 (AVIVA SYSTEMS BIOLOGY, ARP67917\_P050) and Ythdf3  
933 (Santa Cruz, SC-87503).

934

### 935 Flushing oocytes

936 For the collection of oocytes by flushing, female mice were injected with 5 i.u. of pregnant mare  
937 serum gonadotropin (PMSG), and after 46 hours with 5 i.u. of human chorionic gonadotropin  
938 (hCG). Oocytes were extracted from the oviduct 24 hours after the hCG injection. Next, somatic  
939 cells were removed from the oocytes by gentle pipetting in M2 media supplemented with  
940 hyaluronidase.

941

### 942 Poking ovaries

943 For the collection of GV oocytes, female mice were injected with 5 i.u. of pregnant mare serum  
944 gonadotropin (PMSG). After 48 hours, the ovaries were punctured in M2 media, using tweezers.  
945 Next, somatic cells were removed from the oocytes by gentle pipetting in M2 media  
946 supplemented with hyaluronidase.

947

### 948 Immunofluorescence staining

949 Cells subjected to immunofluorescence staining were washed three times with PBS and fixed  
950 with 4% paraformaldehyde for 10 minutes at room temperature. Cells were then washed three  
951 times with PBS and blocked for 15 min with 5% FBS in PBS containing 0.1% Triton X-100. After  
952 incubation with primary antibodies (Over-night, 4°C in 5% FBS in PBS containing 0.1% Tween20)  
953 cells were washed three times with PBST (PBS containing 0.1% Tween20) and incubated for one  
954 hour at room temperature with fluorophore-labelled appropriate secondary antibodies  
955 purchased from Jackson ImmunoResearch. Next, cells were washed and counterstained with  
956 DAPI (1  $\mu\text{g}/\text{ml}$ , 0215754; MP Biomedical), mounted with Shandon Immu-Mount  
957 (ThermoScientific, 9990412) and imaged. All images were collected on LSM700 confocal  
958 microscope and processed with Zeiss ZenDesk and Adobe Photoshop CS4 (Adobe Systems, San  
959 Jose, CA).

960 Sections subjected to immunofluorescence staining were rehydrated, treated with antigen  
961 retrieval, rinsed in PBS for 5 min, and permeabilized in 0.1% Triton X-100 in PBS, then blocked in  
962 Blocking solution (5% normal donkey serum in PBST) in humidified chamber for 1h at RT. Slides  
963 were then incubated in the appropriate primary antibody diluted in blocking solution at 4°C  
964 overnight. Next, sections were washed three times in PBST, incubated with appropriate  
965 fluorochrome-conjugated secondary antibodies diluted in blocking solution for one hour at room  
966 temperature in the dark, washed once in PBS, counterstained with DAPI for 10 min, rinsed twice  
967 in PBS, mounted with Shandon Immu-Mount (ThermoScientific, 9990412) and imaged. All images  
968 were collected on LSM700 confocal microscope and processed with Zeiss ZenDesk and Adobe  
969 Photoshop CS4 (Adobe Systems, San Jose, CA). The following primary antibodies were used:  
970 Ythdf1 (Proteintech, 17479-1-AP), Ythdf2 (AVIVA SYSTEMS BIOLOGY, ARP67917\_P050), Ythdf3

971 (Santa Cruz, SC-87503), Mettl3 (Proteintech Group 15073-1-AP), Nanog (Bethyl, A300-397A or  
972 eBioscience, 14-5761), Esrrb (R&D systems, PP-H6705-00), Oct4 (Santa Cruz, SC9081 or SC5279),  
973 Foxa2 (Santa Cruz, sc-6554), Tuj1 (BioLegend, 801202), Tubulin (Santa Cruz, sc-23950).  
974 Throughout the manuscript, experimental and control samples were handled for staining,  
975 exposure and analysis under identical conditions simultaneously to eliminate variability or bias.  
976

### 977 Alkaline phosphatase (AP) staining

978 Alkaline phosphatase (AP) staining was performed with AP kit (Millipore SCR004) according to  
979 manufacturer protocol. Briefly, cells were fixated using 4% PFA for 2 minutes, and later washed  
980 with TBST. The reagents were then added to the wells, followed by an incubation of 10 minutes  
981 in RT.  
982

### 983 Tetra complementation (4n) of mouse embryo

984 4n tetraploid complementation assay was performed by flushing BDF2 embryos at the two-cell  
985 stage, and subsequently allowing the embryos to develop until the blastocyst stage. At day 3.5  
986 they were used for PSC micro-injection of triple-KO cell line and its corresponding WT cell line.  
987 Embryos were recovered for analysis at E7.5 during development. Embryos were subjected to  
988 H&E staining and were observed for developmental defects. All animal studies were conducted  
989 according to the guideline and following approval by the Weizmann Institute Institutional Animal  
990 Care and Use Committee.  
991

### 992 RNA stability assay

993 For RNA stability assay  $5 \times 10^5$  cells of each cell type were plated on a gelatin-coated 6 cm plate.  
994 48 hours later, the media was replaced with fresh media containing 5  $\mu$ M Actinomycin-D for the  
995 inhibition of mRNA transcription. Cell samples were harvested at the indicated time points (0, 4  
996 and 8 hours) and total RNA was extracted using Trizol, followed by 3' Poly A-RNA-seq library  
997 preparation as previously described (**Geula et al. 2015**).  
998

### 999 Male Germ cell isolation

1000 Male germ cell populations were isolated using FACS as previously describes (**Bastos et al. 2005**;  
1001 **Mahadevaiah et al. 2001**; **DiGiacomo et al. 2013**). Total RNA was isolated from FACS-sorted  
1002 round spermatids, from WT control and Ythdf2 KO, using Trizol. The RNA used for RNA-seq  
1003 (described below).  
1004

### 1005 RNA-seq library preparation

1006 Total RNA was extracted from the indicated mESC cultures using Trizol and treated with DNase  
1007 to avoid DNA contamination. Polyadenylated RNA was purified using Dynabeads mRNA  
1008 purification kit (Invitrogen, Cat #61006), followed by library preparation using ScriptSeq v2 RNA-  
1009 seq Library Preparation Kit (Illumina) according to manufacturer's instruction.  
1010 Male germ cell populations were isolated using FACS as previously described (**Bastos et al. 2005**;  
1011 **Mahadevaiah et al. 2001**; **DiGiacomo et al. 2013**). Total RNA was extracted using Trizol and  
1012 purified using rRNA depletion (Ribo-Zero rRNA removal Kit, Illumina), followed by library

1013 preparation using ScriptSeq V2 RNA-seq Library Preparation Kit (Illumina) according to  
1014 manufacturer's instruction.

1015

### 1016 SMART-seq2 library preparation

1017 Library was prepared according to SMART-seq2 protocol as previously described (**Picelli et al.**  
1018 **2014**), with few changes: oocytes from each mouse were collected in 3 ul M2 and added to 7.9  
1019 ul lysis buffer. Additional 1.1 ul of DDW was added prior to the library preparation.

1020

### 1021 Ribosome profiling & analysis

1022 Ribosome binding profiles in ESCs were measured in WT and KO conditions. For ribosome  
1023 profiling cells were treated with Cycloheximide as previously described (McGlinicy and Ingolia  
1024 2017; Ingolia et al. 2009). Cells were then lysed in lysis buffer (20mM Tris 7.5, 150mM NaCl,  
1025 15mM MgCl<sub>2</sub>, 1mM dithiothreitol) supplemented with 0.5% triton, 30 U/ml Turbo DNase  
1026 (Ambion) and 100µg/ml cycloheximide, ribosome protected fragments were then generated as  
1027 previously described(McGlinicy and Ingolia 2017).

1028 Reads were pre-processed by trimming their linker (sequence CTGTAGGCACCATCAAT) and  
1029 polyA removal with cutadapt. Reads were aligned to mouse genome version mm10 with Bowtie  
1030 aligner (parameters -v -m 16 -p 8 --max), where only uniquely aligned reads were used for  
1031 further analyses. Per gene, for translation calculation, reads were counted in the coding region  
1032 excluding 15 and 6 nucleotides from the beginning and end of each coding sequence (CDS),  
1033 respectively (**Ingolia et al. 2009; McGlinicy and Ingolia 2017**). Translation Efficiency was  
1034 measured for each gene *g* and each condition *i* as log<sub>2</sub>(Ribogi/RNAgi). Normalized translation  
1035 levels (RPKM) are available alongside the raw data, at NCBI GEO series GSE148039.

1036

### 1037 3' Poly A- RNA-sequencing Analysis

1038 3'-Poly A-RNA-seq was measured from WT, and KO mESCs. KO cell lines: Ythdf1<sup>-/-</sup>, Ythdf2<sup>-/-</sup>,  
1039 Ythdf3<sup>-/-</sup>, Ythdf1<sup>-/-</sup>Ythdf2<sup>-/-</sup>Ythdf3<sup>-/-</sup> and Mettl3<sup>-/-</sup>. In each condition 2 biological replicates were  
1040 generated, and in each replicate, three time points were measured, 0, 4 and 8 hours after  
1041 Actinomycin-D induction, with two replicates of time points 0 and 8. In addition, similar 3'-Poly  
1042 A-RNA-seq dataset from previous paper (**Geula et al. 2015**), including samples from mESCs and  
1043 mouse Embryoid bodies (EB), of Mettl3<sup>-/-</sup> and WT, measured in the same time points, was  
1044 reanalyzed as described herein.

1045

| Cell type | Genotype                                                | Biological replicates | Time points in hours(repl) | Library method |
|-----------|---------------------------------------------------------|-----------------------|----------------------------|----------------|
| mESCs     | WT                                                      | 2                     | 0(2),4,8(2)                | 3'-polyA-seq   |
| mESCs     | Ythdf1 <sup>-/-</sup>                                   | 2                     | 0(2),4,8(2)                | 3'-polyA-seq   |
| mESCs     | Ythdf2 <sup>-/-</sup>                                   | 2                     | 0(2),4,8(2)                | 3'-polyA-seq   |
| mESCs     | Ythdf3 <sup>-/-</sup>                                   | 2                     | 0(2),4,8(2)                | 3'-polyA-seq   |
| mESCs     | Ythdf1 <sup>-/-</sup> 2 <sup>-/-</sup> 3 <sup>-/-</sup> | 2                     | 0(2),4,8(2)                | 3'-polyA-seq   |
| mESCs     | WT                                                      | 2                     | 0,4,8                      | 3'-polyA-seq   |
| mESCs     | Mettl3 <sup>-/-</sup>                                   | 2                     | 0,4,8                      | 3'-polyA-seq   |
| EBs       | WT                                                      | 1                     | 0,4,8                      | 3'-polyA-seq   |

|     |                       |   |       |              |
|-----|-----------------------|---|-------|--------------|
| EBs | Mettl3 <sup>-/-</sup> | 1 | 0,4,8 | 3'-polyA-seq |
|-----|-----------------------|---|-------|--------------|

1046

1047 Reads were aligned to mouse genome version mm10 with Bowtie2 software (**Langmead and**  
 1048 **Salzberg 2012**) using its default parameters. Gene expression levels were estimated using ESAT  
 1049 software (**Derr et al. 2016**), and normalized by library size of each sample (FPM, fragments per  
 1050 million reads). To reduce noise, genes were filtered in each sample, to include only genes with at  
 1051 least 3 positive FPM calls (2 in Geula's dataset), and at least one FPM call > 3 (0.5 in Geula's  
 1052 dataset), leaving 9K-12K genes in each sample.

1053 3' polyA RNA-seq values are available alongside the raw data, at NCBI GEO series GSE148039.

1054

### 1055 mRNA Half-Life Calculation

1056 The half-life of all genes was calculated according to the following equation:  $\ln(C_i/C_0) = -kt_i$ ,  
 1057 where k is degradation rate,  $C_i$  is the mRNA value at time i, and  $t_i$  is the time interval in hours  
 1058 (**Chen et al. 2008**). Degradation rate k was estimated for each gene and each sample, from its  
 1059 levels in time points 0h, 4h, 8h (as explained above) using linear regression  $\text{lm}()$  function in R, on  
 1060 the log transformed levels. Half-life  $t_{1/2}$  is  $\ln(2)/k$ , where k is the degradation rate. Genes which  
 1061 had negative half-life due to slight experimental noise were ignored for the rest of the analysis.  
 1062 Half-life distribution was calculated for each sample, for two groups of genes: non-m<sup>6</sup>A genes,  
 1063 and m<sup>6</sup>A genes which were also bound by either Ythdf1,2 or 3 (m<sup>6</sup>A\_YTH). P-value was calculated  
 1064 using Kolmogorov-Smirnov test.

1065

### 1066 RNA-Seq analysis

1067 RNA sequencing was measured in mESC, spermatoids and oocytes as detailed in the table below:

1068

| Cell type        | Genotype                                                | Biological replicates | Library method    | Single/paired-end |
|------------------|---------------------------------------------------------|-----------------------|-------------------|-------------------|
| mESCs            | WT                                                      | 2                     | PolyA RNA-seq     | Single            |
| mESCs            | Ythdf1 <sup>-/-</sup>                                   | 2                     | PolyA RNA-seq     | Single            |
| mESCs            | Ythdf2 <sup>-/-</sup>                                   | 2                     | PolyA RNA-seq     | Single            |
| mESCs            | Ythdf3 <sup>-/-</sup>                                   | 2                     | PolyA RNA-seq     | Single            |
| mESCs            | Mettl3 <sup>-/-</sup>                                   | 2                     | PolyA RNA-seq     | Single            |
| mESCs            | Ythdf1 <sup>-/-</sup> 2 <sup>-/-</sup> 3 <sup>-/-</sup> | 2                     | PolyA RNA-seq     | Single            |
| GV Oocytes       | Mettl3 <sup>f/f</sup> Zp3-Cre-                          | 4                     | SMART-seq         | paired            |
| GV Oocytes       | Mettl3 <sup>f/f</sup> Zp3-Cre+                          | 3                     | SMART-seq         | paired            |
| Post-GV Oocytes  | Ythdf2 <sup>+/-</sup>                                   | 3                     | SMART-seq         | paired            |
| Post-GV Oocytes  | Ythdf2 <sup>-/-</sup>                                   | 2                     | SMART-seq         | paired            |
| Round spermatids | Ythdf2 <sup>+/+</sup>                                   | 1                     | Ribo-zero RNA-seq | paired            |
| Round spermatids | Ythdf2 <sup>-/-</sup>                                   | 2                     | Ribo-zero RNA-seq | paired            |

1069

1070 Samples were analyzed using UTAP software (**Kohen et al. 2019**): Reads were trimmed using  
 1071 cutadapt (Martin 2011) (parameters: -a ADAPTER1 -a "A{10}" -a "T{10}" -A "A{10}" -A "T{10}" -

1072 times 2 -q 20 -m 25). Reads were mapped to genome mm10 using STAR (**Dobin et al. 2013**)  
1073 v2.4.2a (parameters: `-alignEndsType EndToEnd, -outFilterMismatchNoverLmax 0.05, -`  
1074 `twopassMode Basic`). Sample counting was done using STAR, quantifying mm10 RefSeq  
1075 annotated genes. Further analysis is done for genes having minimum 5 read in at least one  
1076 sample. Normalization of the counts and differential expression analysis was performed using  
1077 DESeq2 (**Love et al. 2014**) with the parameters: `betaPrior=True, cooksCutoff=FALSE,`  
1078 `independentFiltering=FALSE`. Raw P values were adjusted for multiple testing using the  
1079 procedure of Benjamini and Hochberg. Differentially expressed genes were selected with the  
1080 following parameter: `padj <= 0.05, |log2FoldChange| >= 1, baseMean >= 5`.  
1081 PCA and Hierarchical clustering were generated in UTAP software  
1082 The normalized expression levels are available alongside the raw data, at NCBI GEO series  
1083 GSE148039.  
1084

### 1085 Enrichment analysis

1086 Enrichment analysis was done either using GeneAnalytics tool (**Figures S3c, S4f, S6c**) (**Fuchs et**  
1087 **al. 2016**), or using Fisher exact test (**Figures 5d, S12a,d**).  
1088

### 1090 CLIP protocol & CLIP Analysis

1091  
1092 Binding targets of Ythdf1, Ythdf2 and Ythdf3 were determined in mESCs using eCLIP method, as  
1093 described previously (Van Nostrand et al. 2016). 291, 2061 and 306 peaks were identified  
1094 respectively, mapped to 147, 1034 and 149 genes. Significance of overlap with previous targets  
1095 and with m<sup>6</sup>A-methylated genes was estimated using Fisher's exact test (**Figure S12**). Targets  
1096 were mapped to human targets in order to test overlap, as previously published targets were  
1097 measured in human (Patil et al. 2016; Wang et al. 2015; Li et al. 2017; Niu et al. 2013; Shi et al.  
1098 2017). Binding Motif was detected using homer software v4.9.1  
1099 (<http://homer.ucsd.edu/homer/motif/>).  
1100

### 1101 Bibliography

- 1102  
1103 Bastos H, Lassalle B, Chicheportiche A, Riou L, Testart J, Allemand I, Fouchet P. 2005. Flow  
1104 cytometric characterization of viable meiotic and postmeiotic cells by Hoechst 33342 in  
1105 mouse spermatogenesis. *Cytom Part A* **65**: 40–9.  
1106 Chen CYA, Ezzeddine N, Shyu A Bin. 2008. Chapter 17 Messenger RNA Half-Life Measurements  
1107 in Mammalian Cells. In *Methods in Enzymology*, pp. 335–57.  
1108 Derr A, Yang C, Zilionis R, Sergushichev A, Blodgett DM, Redick S, Bortell R, Luban J, Harlan DM,  
1109 Kadener S, et al. 2016. End Sequence Analysis Toolkit (ESAT) expands the extractable  
1110 information from single-cell RNA-seq data. *Genome Res* **26**: 1397–1410.  
1111 DiGiacomo M, Comazzetto S, Saini H, DeFazio S, Carrieri C, Morgan M, Vasiliauskaite L, Benes V,  
1112 Enright AJ, O'Carroll D. 2013. Multiple Epigenetic Mechanisms and the piRNA Pathway  
1113 Enforce LINE1 Silencing during Adult Spermatogenesis. *Mol Cell* **50**: 601–8.  
1114 Dobin A, Davis CA, Schlesinger F, Drenkow J, Zaleski C, Jha S, Batut P, Chaisson M, Gingeras TR.

- 1115 2013. STAR: Ultrafast universal RNA-seq aligner. *Bioinformatics* **29**: 15–21.
- 1116 Fuchs SBA, Lieder I, Stelzer G, Mazor Y, Buzhor E, Kaplan S, Bogoch Y, Plaschkes I, Shitrit A,
- 1117 Rappaport N, et al. 2016. GeneAnalytics: An Integrative Gene Set Analysis Tool for Next
- 1118 Generation Sequencing, RNAseq and Microarray Data. *Omi A J Integr Biol* **20**: 139–51.
- 1119 Gafni O, Weinberger L, Mansour AA, Manor YS, Chomsky E, Ben-Yosef D, Kalma Y, Viukov S,
- 1120 Maza I, Zviran A, et al. 2013. Derivation of novel human ground state naive pluripotent
- 1121 stem cells. *Nature* **504**.
- 1122 Geula S, Moshitch-Moshkovitz S, Dominissini D, Mansour AA, Kol N, Salmon-Divon M,
- 1123 Hershkovitz V, Peer E, Mor N, Manor YS, et al. 2015. m<sup>6</sup>A mRNA methylation facilitates
- 1124 resolution of naïve pluripotency toward differentiation. *Science (80- )* **347**.
- 1125 Ingolia NT, Ghaemmaghami S, Newman JRS, Weissman JS. 2009. Genome-wide analysis in vivo
- 1126 of translation with nucleotide resolution using ribosome profiling. *Science (80- )* **324**: 218–
- 1127 23.
- 1128 Kohen R, Barlev J, Hornung G, Stelzer G, Feldmesser E, Kogan K, Safran M, Leshkowitz D. 2019.
- 1129 UTAP: User-friendly Transcriptome Analysis Pipeline. *BMC Bioinformatics* **20**: 154.
- 1130 Langmead B, Salzberg SL. 2012. Fast gapped-read alignment with Bowtie 2. *Nat Methods* **9**:
- 1131 357–9.
- 1132 Li A, Chen YS, Ping XL, Yang X, Xiao W, Yang Y, Sun HY, Zhu Q, Baidya P, Wang X, et al. 2017.
- 1133 Cytoplasmic m<sup>6</sup>A reader YTHDF3 promotes mRNA translation. *Cell Res*.
- 1134 Love MI, Huber W, Anders S. 2014. Moderated estimation of fold change and dispersion for
- 1135 RNA-seq data with DESeq2. *Genome Biol* **15**: 550.
- 1136 Mahadevaiah SK, Turner JMA, Baudat F, Rogakou EP, De Boer P, Blanco-Rodríguez J, Jasin M,
- 1137 Keeney S, Bonner WM, Burgoyne PS. 2001. Recombinational DNA double-strand breaks in
- 1138 mice precede synapsis. *Nat Genet* **27**: 271–6.
- 1139 Martin M. 2011. Cutadapt removes adapter sequences from high-throughput sequencing reads.
- 1140 *EMBnet.journal*.
- 1141 McGlincy NJ, Ingolia NT. 2017. Transcriptome-wide measurement of translation by ribosome
- 1142 profiling. *Methods* **126**: 112–129.
- 1143 Niu Y, Zhao X, Wu YS, Li MM, Wang XJ, Yang YG. 2013. N<sup>6</sup>-methyl-adenosine (m<sup>6</sup>A) in RNA: An
- 1144 Old Modification with A Novel Epigenetic Function. *Genomics, Proteomics Bioinforma* **11**:
- 1145 8–17.
- 1146 Patil DP, Chen CK, Pickering BF, Chow A, Jackson C, Guttman M, Jaffrey SR. 2016. M<sup>6</sup>A RNA
- 1147 methylation promotes XIST-mediated transcriptional repression. *Nature* **537**: 369–373.
- 1148 Picelli S, Faridani OR, Björklund ÅK, Winberg G, Sagasser S, Sandberg R. 2014. Full-length RNA-
- 1149 seq from single cells using Smart-seq2. *Nat Protoc* **9**: 171–81.
- 1150 Shi H, Wang X, Lu Z, Zhao BS, Ma H, Hsu PJ, Liu C, He C. 2017. YTHDF3 facilitates translation and
- 1151 decay of N<sup>6</sup>-methyladenosine-modified RNA. *Cell Res* **27**: 315–328.
- 1152 Van Nostrand EL, Pratt GA, Shishkin AA, Gelboin-Burkhart C, Fang MY, Sundararaman B, Blue
- 1153 SM, Nguyen TB, Surka C, Elkins K, et al. 2016. Robust transcriptome-wide discovery of RNA-
- 1154 binding protein binding sites with enhanced CLIP (eCLIP). *Nat Methods* **13**: 508–14.
- 1155 Wang X, Zhao BS, Roundtree IA, Lu Z, Han D, Ma H, Weng X, Chen K, Shi H, He C. 2015. N<sup>6</sup>-
- 1156 methyladenosine modulates messenger RNA translation efficiency. *Cell* **161**: 1388–99.
- 1157 Yang H, Wang H, Jaenisch R. 2014. Generating genetically modified mice using CRISPR/Cas-
- 1158 mediated genome engineering. *Nat Protoc* **9**: 1956–68.







Figure 2. Mettl3 and Ythdf2 are essential for male mice fertility

**a**

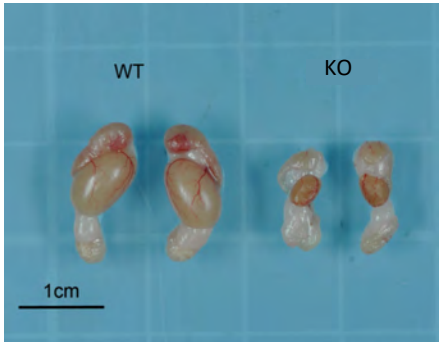

**b**

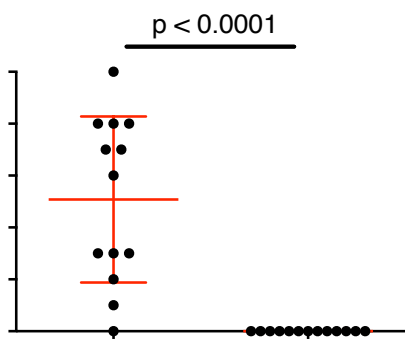

**c**

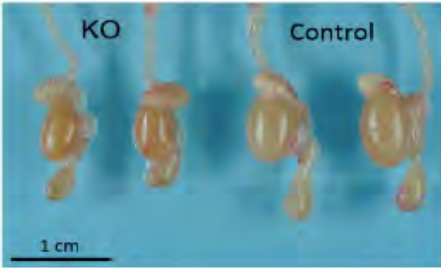

**d**

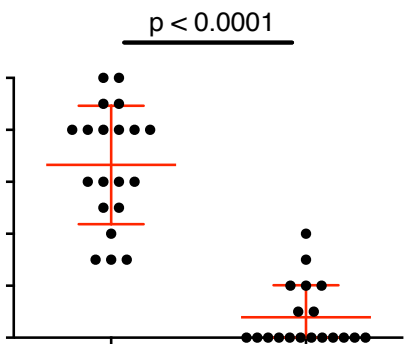

**e**

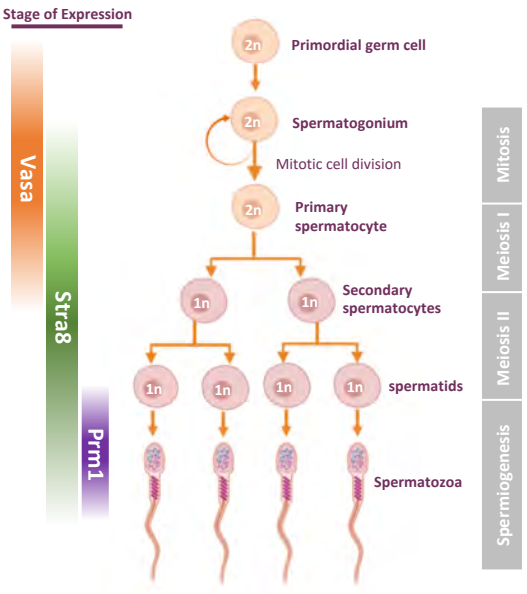

**f**

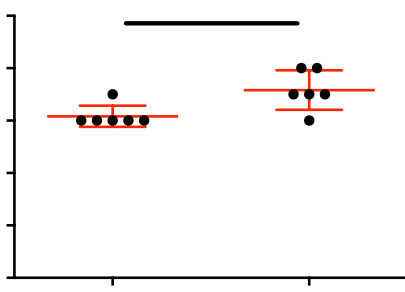

**g**

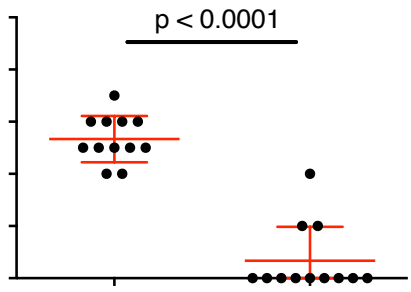

**h**

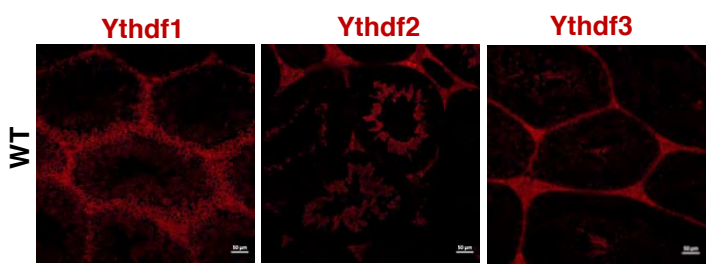

Figure 3. Characterization of Ythdf1-KO, Ythdf2-KO and Ythdf3-KO mice

**a**

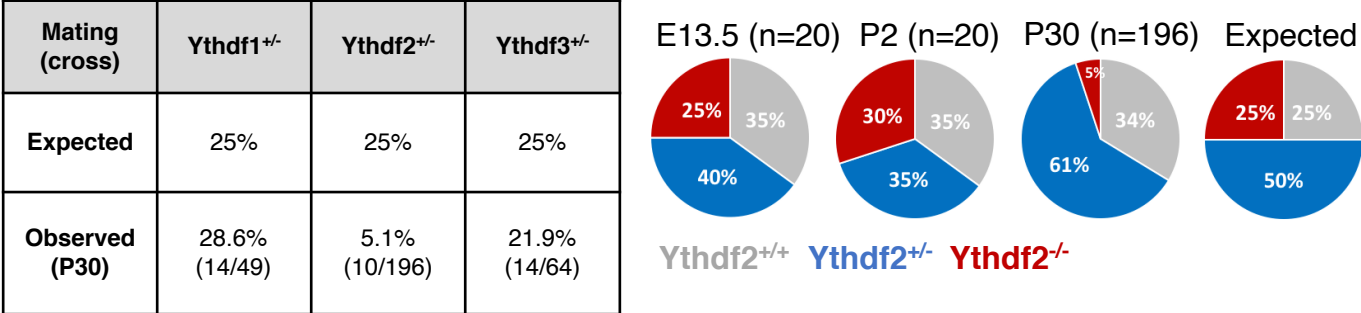

**b**

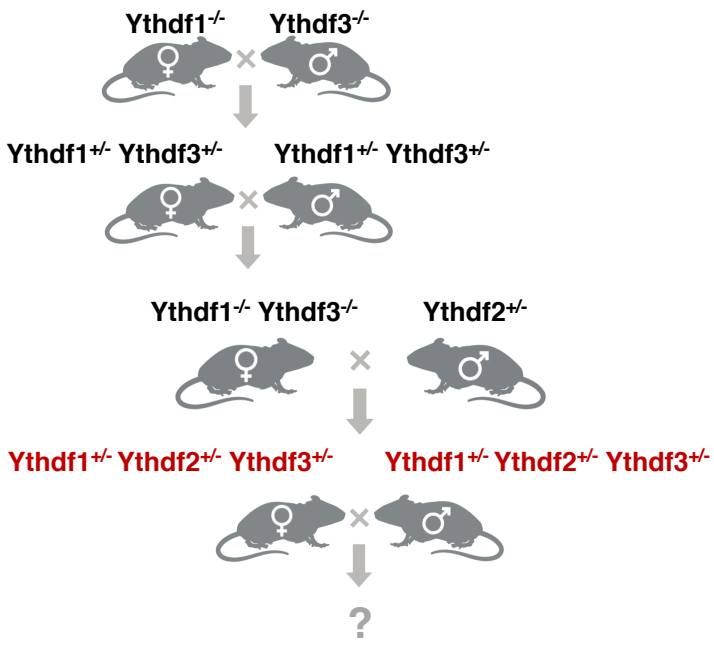

**c**

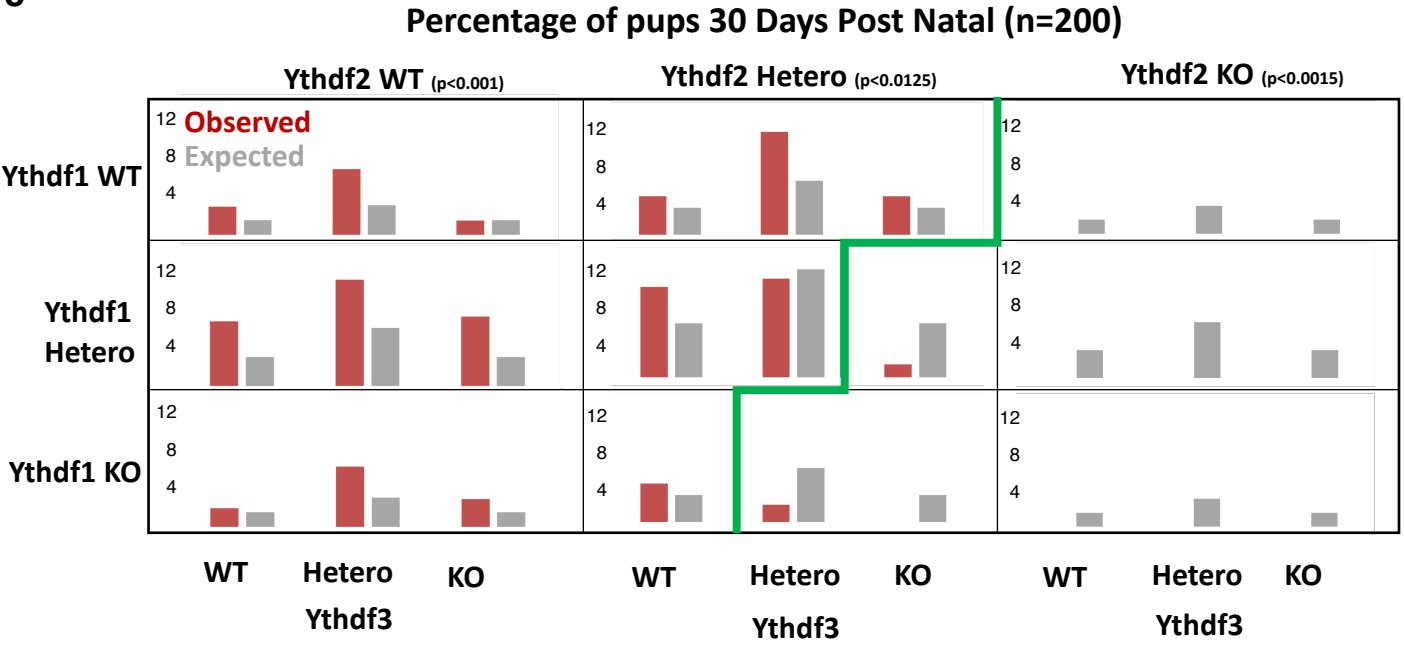

**d**

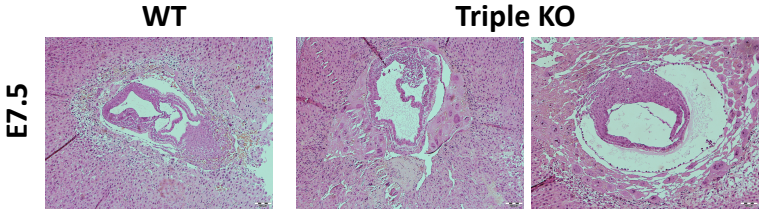

Figure 4. Ythdf1, Ythdf2 and Ythdf3 are redundant in ESCs differentiation

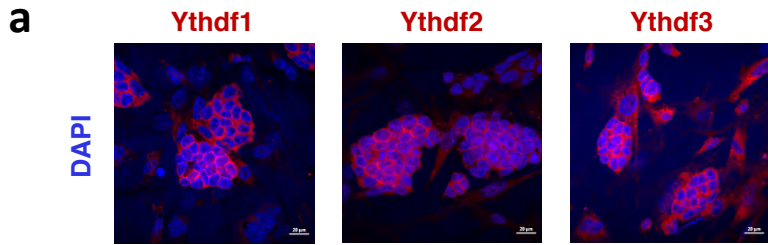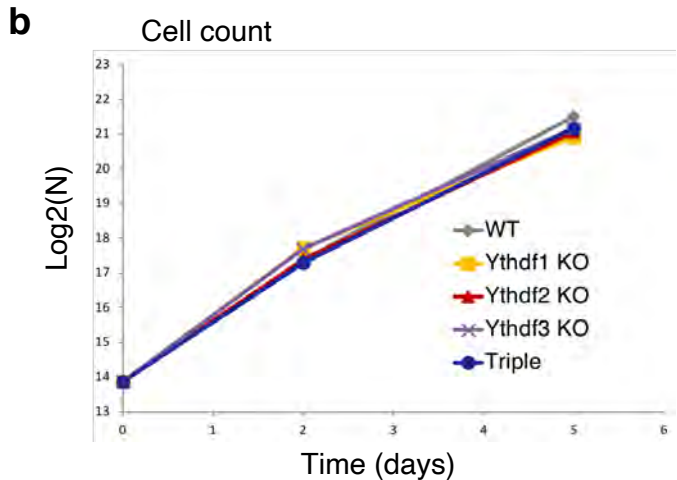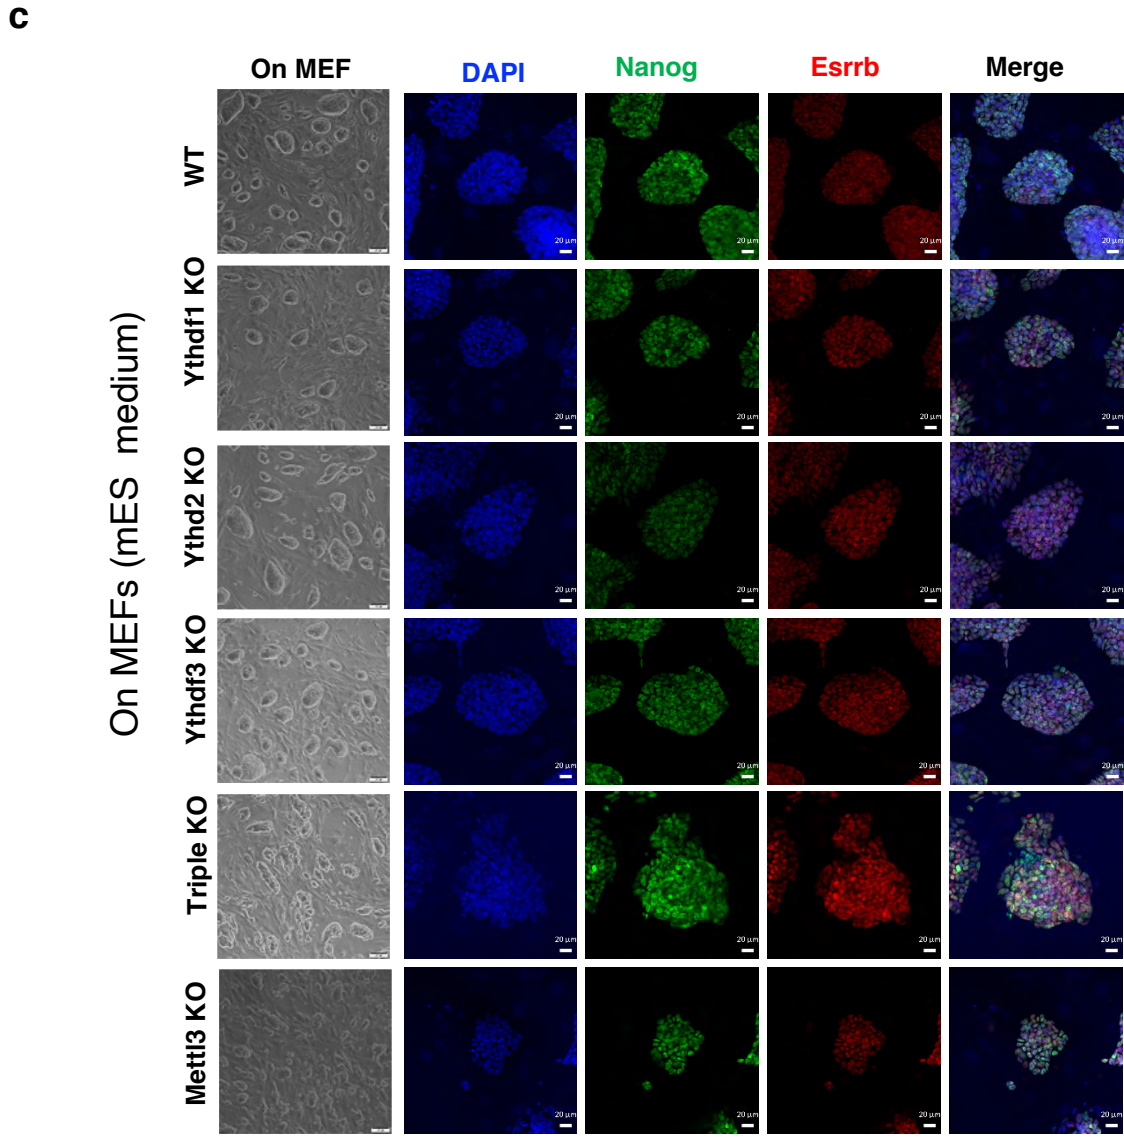

Figure 4..cont. Ythdf1, Ythdf2 and Ythdf3 are redundant in ESCs differentiation

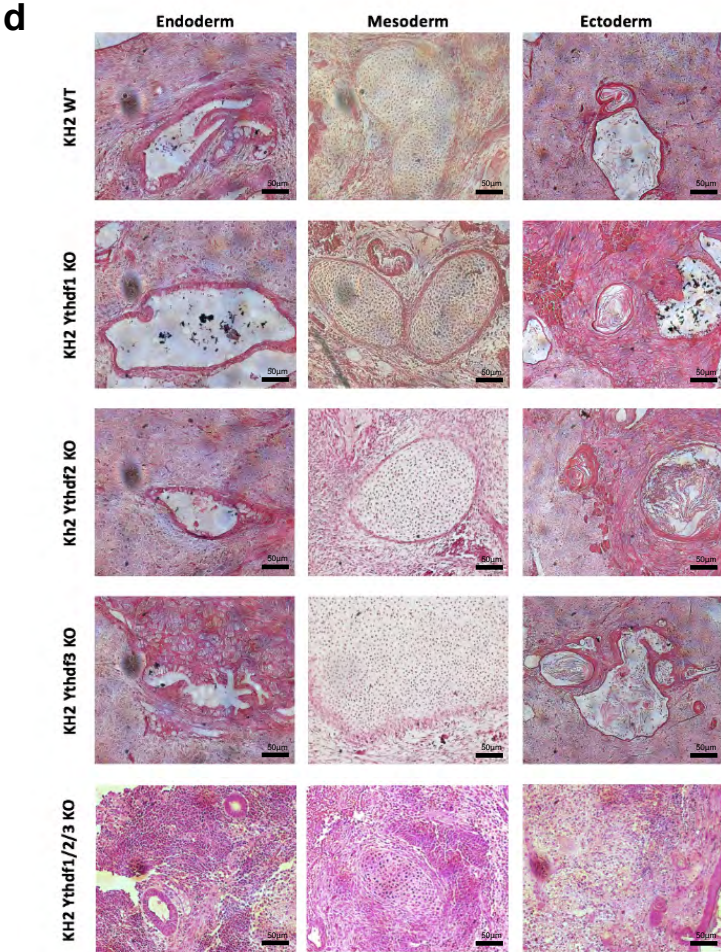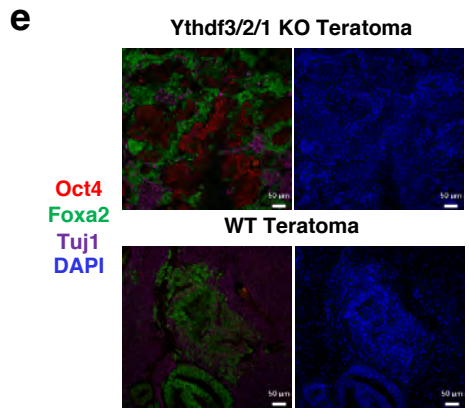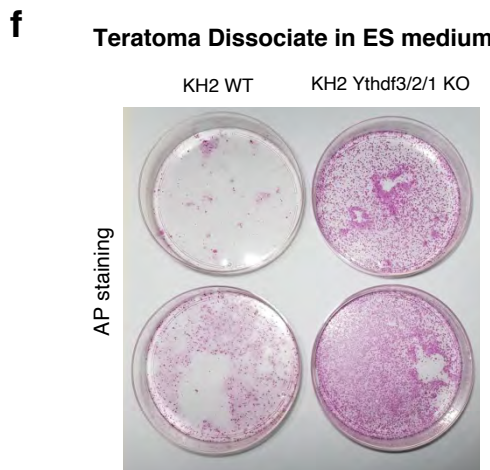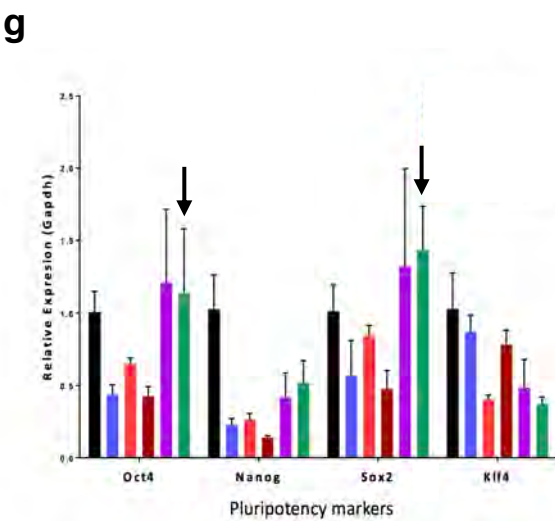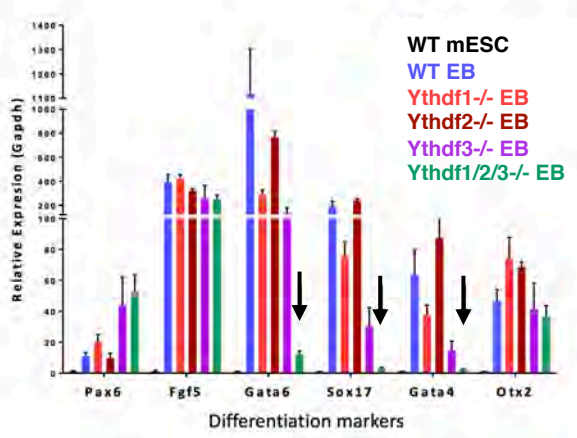

Figure 5. Triple-KO has a dramatic effect on gene expression

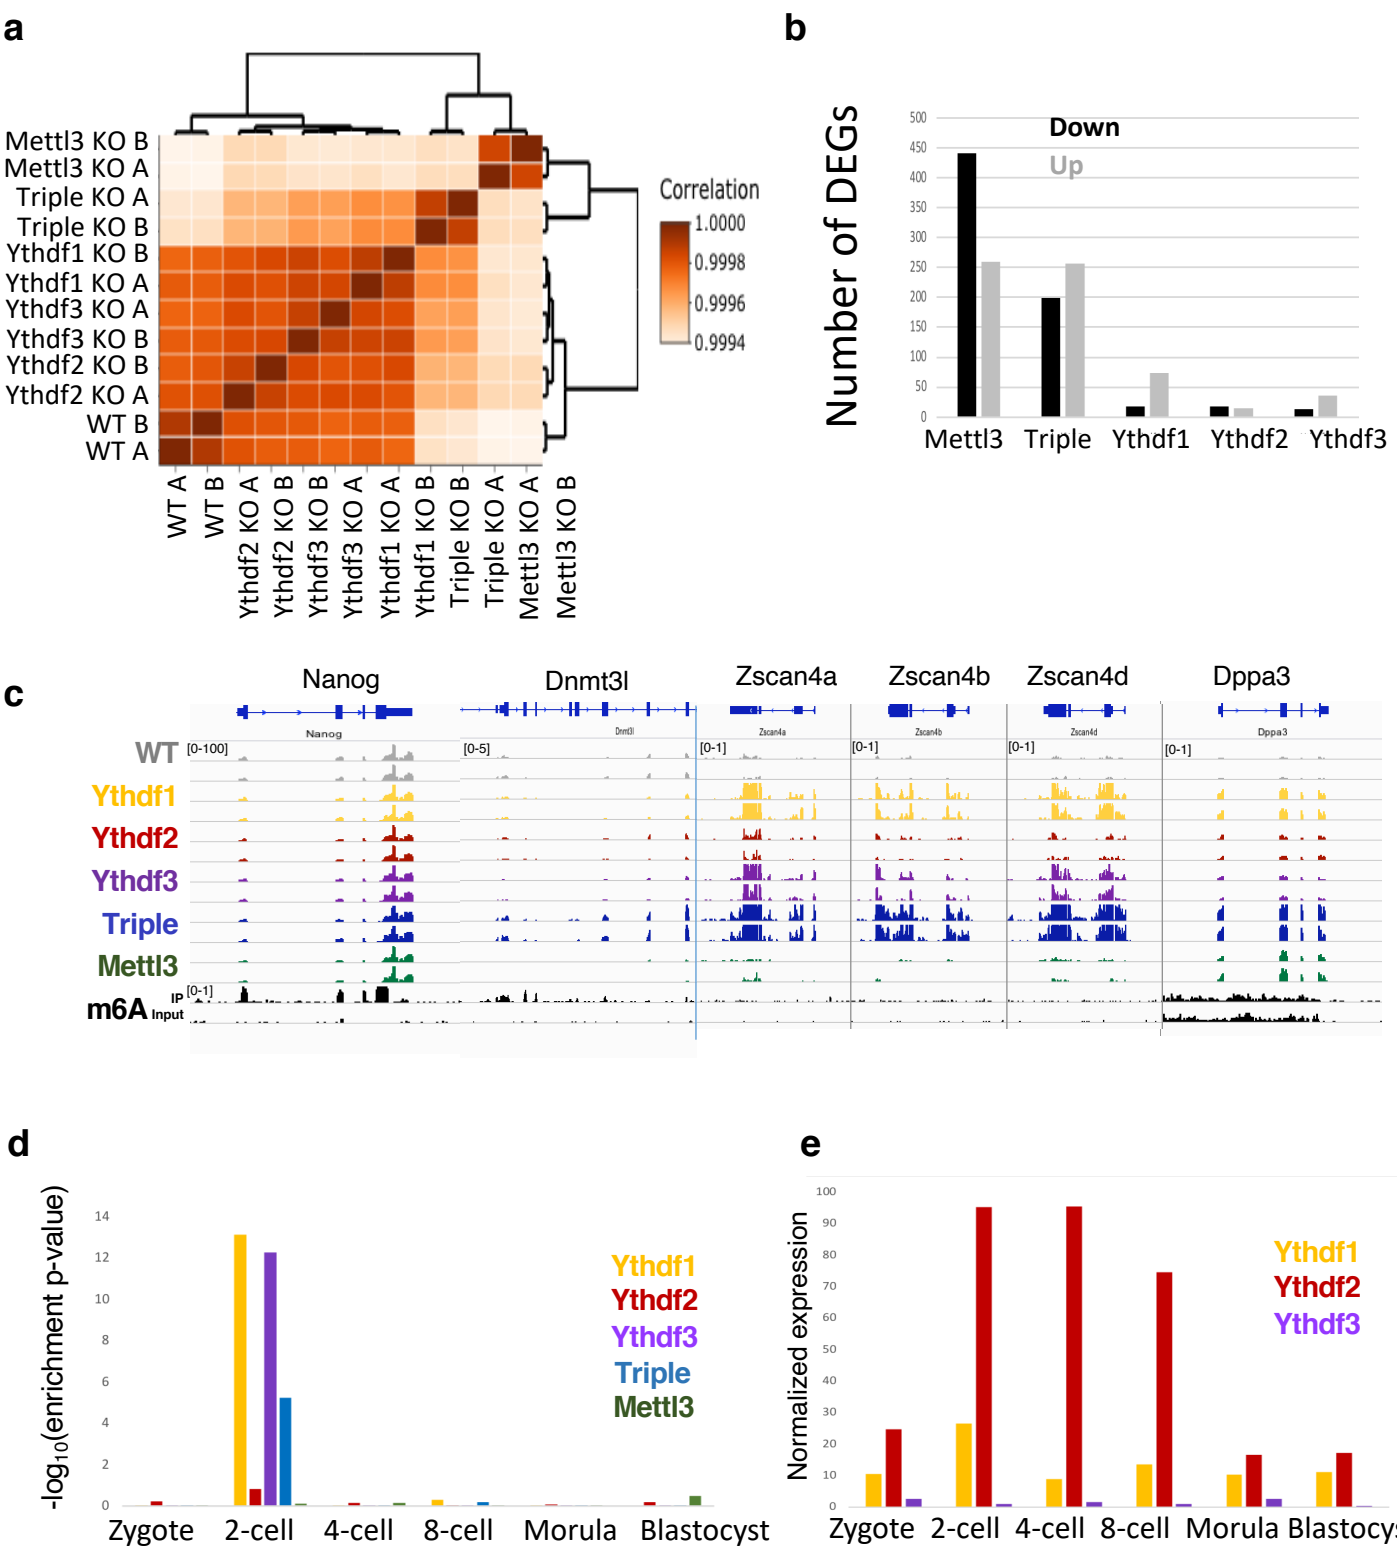

Figure 6. Single and Triple KOs in degradation & translation

**a**

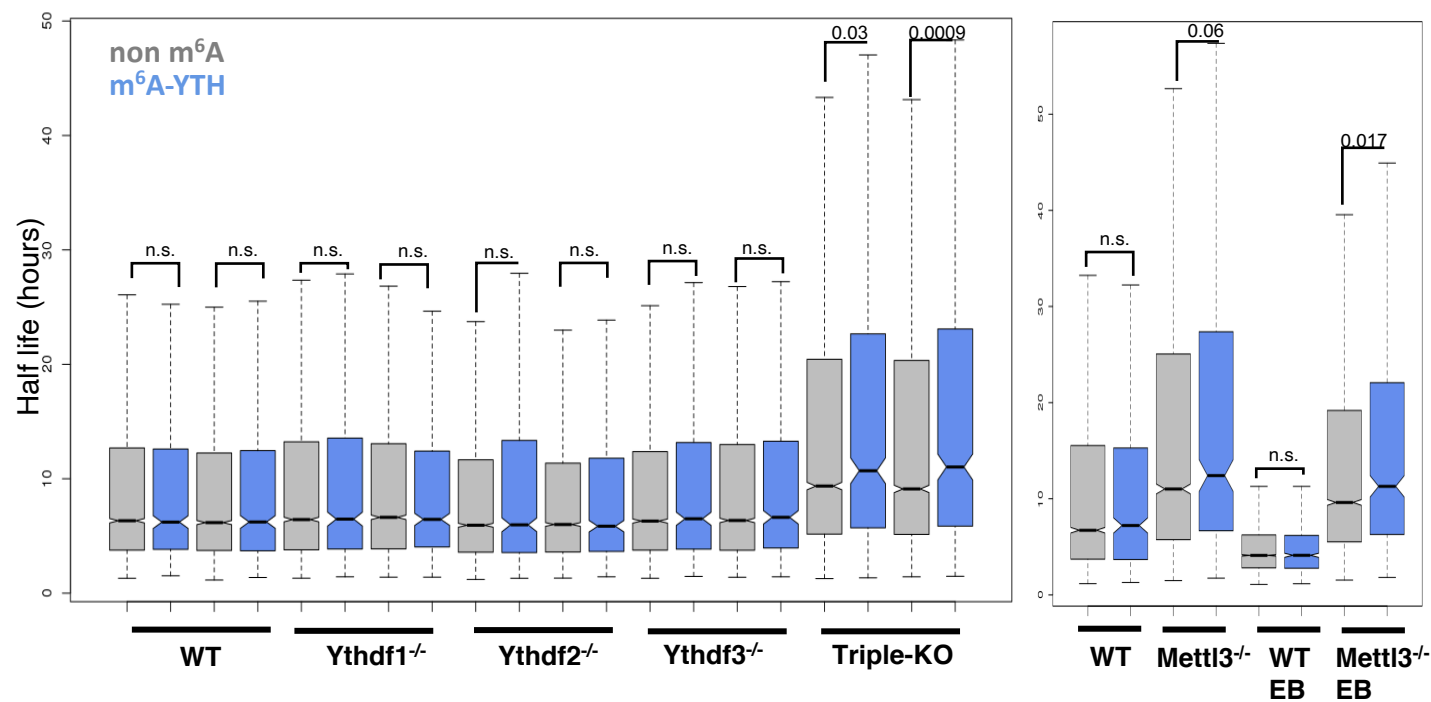

**b**

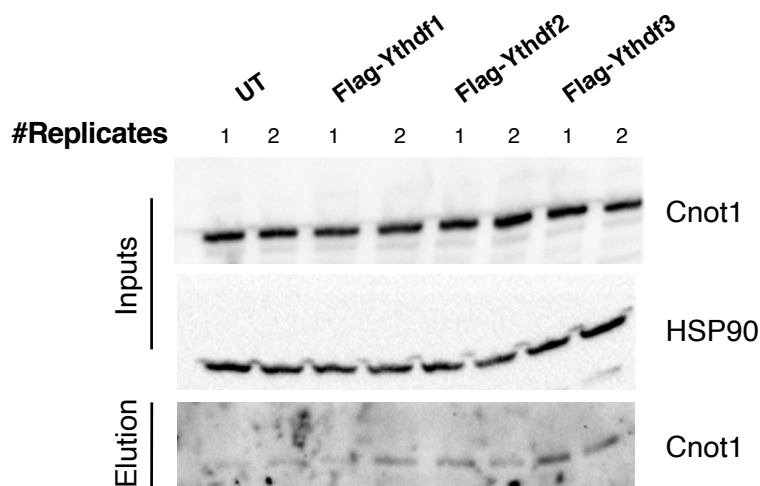

**c**

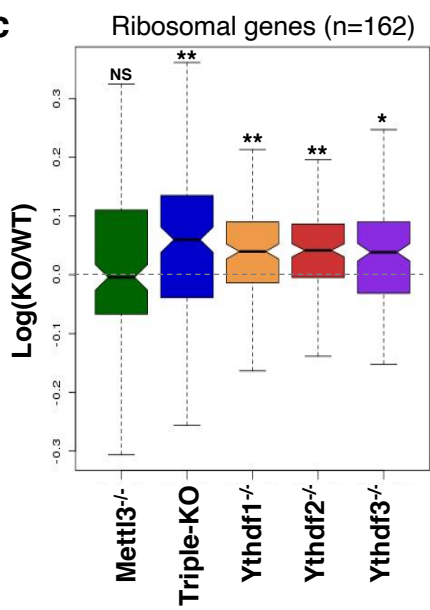

**d**

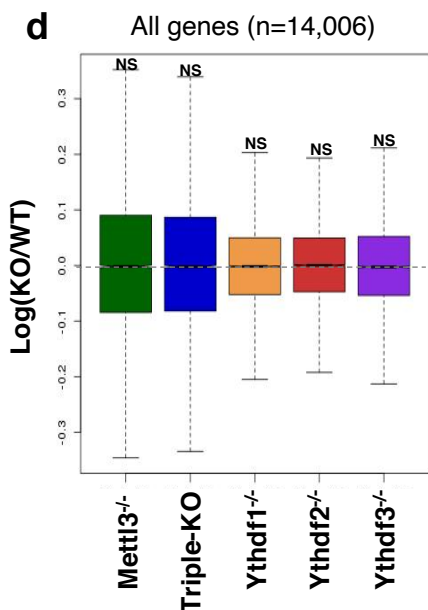

Figure S1. Generating Ythdf1-KO, Ythdf2-KO and Ythdf3-KO *in vivo* and validation

**a**

```

sp|Q11Y7|YTHD_MOUSE MSASSLLRQ--KPKQQQNVVQNGSVHQKGLKDDDFEFLYLPQARPHRYATNMSDEYLP 58
sp|P59326|YTHD_MOUSE MSATSV-DQ-KTYQDNVYVQGLRQDAVNDNDFEFLDQGNFMRVPMNSDFPLSS 58
sp|Q8BYK6|YTHD_MOUSE MSATSV-DGKPFQDQNVVYVQNGSIHQDAVNDNDFEFLDQGNFMRVPMNSDFPMS 59
.....
sp|Q11Y7|YTHD_MOUSE YTFPFIIGFYSLGEAMSTAGDTPAMFLYSYGLSNGEHLFLPAMFGQAGLGGT-PFL 117
sp|P59326|YTHD_MOUSE YTFPFIIGFYSLGEAMSTAGDTPFPIVLTLYQGLSNDRFRDADVYDQVQGLGNN--I 115
sp|Q8BYK6|YTHD_MOUSE YTFPFIIGFYSLGEAMSTAGDTPMFLTLYQGLSNDRFRDADVYDQVQGLGNYFFFL 119
.....
sp|Q11Y7|YTHD_MOUSE QHQGFVFFPFCIDFLAMONNSQQGTFSSQVSENYTAPFSLGGMIDQSAFAMETLN 177
sp|P59326|YTHD_MOUSE YQHRFFPFFRPAFAFAMTSGSQDQDQGRASVYSSYTFPSSLGATITDQAGFGDLS 175
sp|Q8BYK6|YTHD_MOUSE QHQGFVFFPFRADFTWQTSQSQDQGRASVYSSYTFPSSLGATITDQAGFGDLS 179
.....
sp|Q11Y7|YTHD_MOUSE KAPKQRTIDQGMALLGQTVASVYVYVGVGSGEITRIVASSLFPATIAFPEFA 237
sp|P59326|YTHD_MOUSE KAPKQRLHQGQGLIGVETVLA-VYFQGVVYVVALQGLVLSGQGVVQVWVDFPFT 232
sp|Q8BYK6|YTHD_MOUSE KVPGISIDIQGQGLIGDGLTA-AVYTVGTALSSGQTS-IAT-NWVFFGSAAPKPT 236
.....
sp|Q11Y7|YTHD_MOUSE SMADIASFPAKQKPLTYNG--LAGEFLPPPFIKHWIDQVWNGVPAVAPQALVON 295
sp|P59326|YTHD_MOUSE SMADIASFPAKQKPLTYNG--LAGEFLPPPFIKHWIDQVWNGVPAVAPQALVON 295
sp|Q8BYK6|YTHD_MOUSE SMADIASFPAKQKPLTYNG--LAGEFLPPPFIKHWIDQVWNGVPAVAPQALVON 296
.....
sp|Q11Y7|YTHD_MOUSE IQGPTGSPVQVQAN-SEPPVAQAVVQDQPLFPF-----PQAGLSVQQA 345
sp|P59326|YTHD_MOUSE PD-AA-PQDQVAPLQVPPFLVQ-----PQVGS-PQQ 222
sp|Q8BYK6|YTHD_MOUSE PD-TIIGQVPLI---QVPLVQVGLPQ-QQVPPVQVQVQVQVQVQVQVQVQVQV 348
.....
sp|Q11Y7|YTHD_MOUSE AQPTRVAVRNSGGGCHNGY---RGNVQVQVQVQVQVQVQVQVQVQVQVQVQV 402
sp|P59326|YTHD_MOUSE PLOPRVAVRNSKAAFQVQVQVQVQVQVQVQVQVQVQVQVQVQVQVQVQVQVQV 381
sp|Q8BYK6|YTHD_MOUSE QLRVAVRNSKAAFQVQVQVQVQVQVQVQVQVQVQVQVQVQVQVQVQVQVQV 408
.....
sp|Q11Y7|YTHD_MOUSE FDNLLRSGVFFIIFSSDDIRHSIYSIMCTEKNHLLGAFVSNSSGQVPLFVSN 462
sp|P59326|YTHD_MOUSE FDNLLRSGVFFIIFSSDDIRHSIYSIMCTEKNHLLGAFVSNSSGQVPLFVSN 461
sp|Q8BYK6|YTHD_MOUSE FDNLLRSGVFFIIFSSDDIRHSIYSIMCTEKNHLLGAFVSNSSGQVPLFVSN 468
.....
sp|Q11Y7|YTHD_MOUSE GSGRFQVARNISAVYVTCAGVNSQVWQVDFVWVIFVDFVNSQLRHSILENDSFP 522
sp|P59326|YTHD_MOUSE GSGRFQVARNISAVYVTCAGVNSQVWQVDFVWVIFVDFVNSQLRHSILENDSFP 501
sp|Q8BYK6|YTHD_MOUSE GSGRFQVARNISAVYVTCAGVNSQVWQVDFVWVIFVDFVNSQLRHSILENDSFP 528
.....
sp|Q11Y7|YTHD_MOUSE VTHSDQVPLEAIVQLSLIASVYHTSIFDFSRVYEQEEREVVRHQGQGS- 579
sp|P59326|YTHD_MOUSE VTHSDQVPLEAIVQLSLIASVYHTSIFDFSRVYEQEEREVVRHQGQGS- 559
sp|Q8BYK6|YTHD_MOUSE VTHSDQVPLEAIVQLSLIASVYHTSIFDFSRVYEQEEREVVRHQGQGS- 585
.....

```

**b**

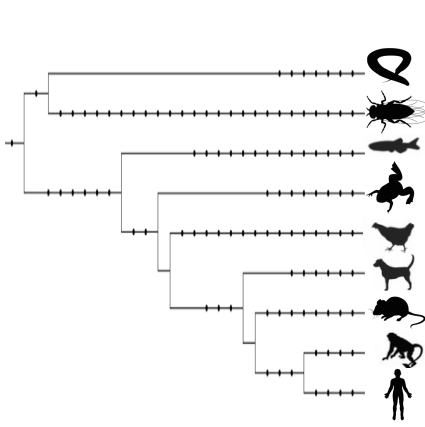

Ythdf1 Ythdf2 Ythdf3

|   |   |   |
|---|---|---|
| - | - | - |
| + | - | - |
| + | + | + |
| + | + | + |
| + | + | + |
| + | + | + |
| + | + | + |
| + | + | + |
| + | + | + |
| + | + | + |

**c**

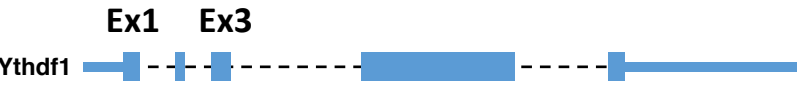

Mutant allele: 10bp deletion  
 agccctac ~~ctttctggac~~ agtccaatccg

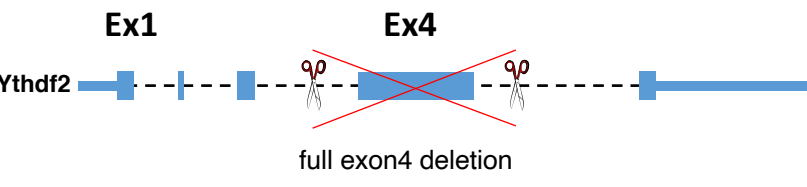

full exon4 deletion

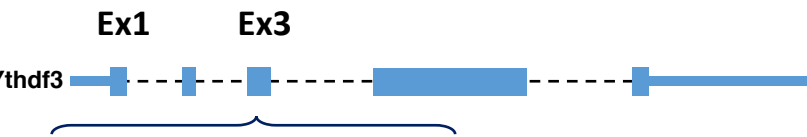

Mutant allele: 14bp deletion  
 aatgatg ~~attttgaccatac~~ ttaagttagc

Figure S1..Cont. Generating Ythdf1-KO, Ythdf2-KO and Ythdf3-KO *in vivo* and validation

d

**Ythdf1 KO primers**

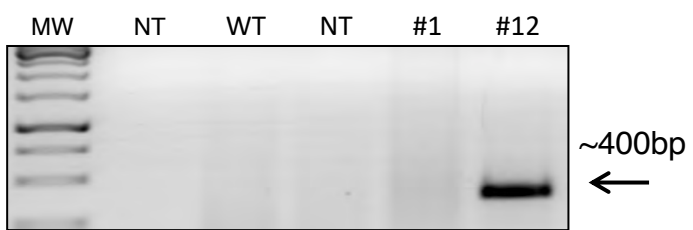

**Ythdf2 KO primers**

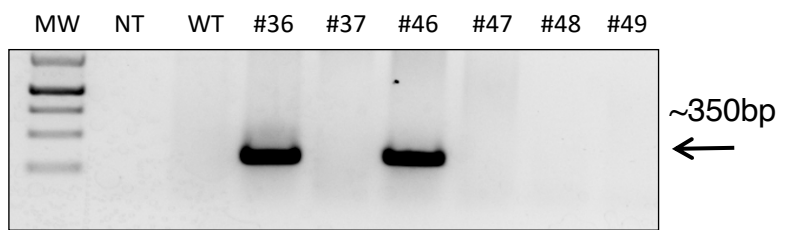

**Ythdf3 KO primers**

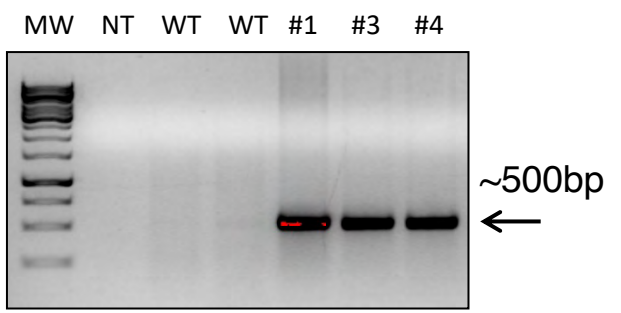



Figure S2. Generating conditional Knock-Out mice models

**a**

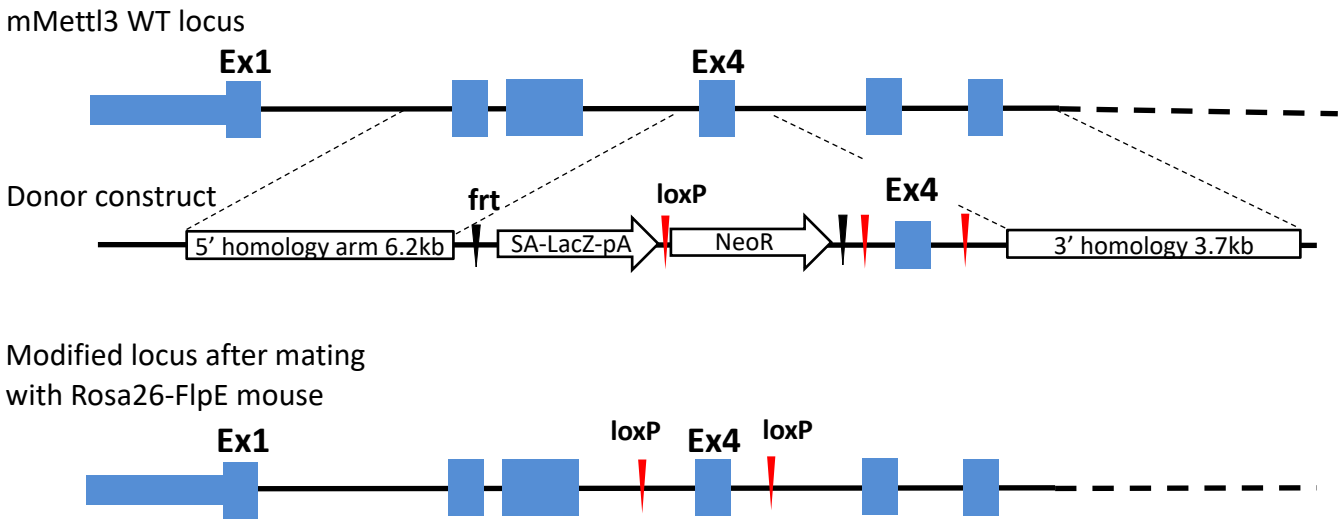

**b**

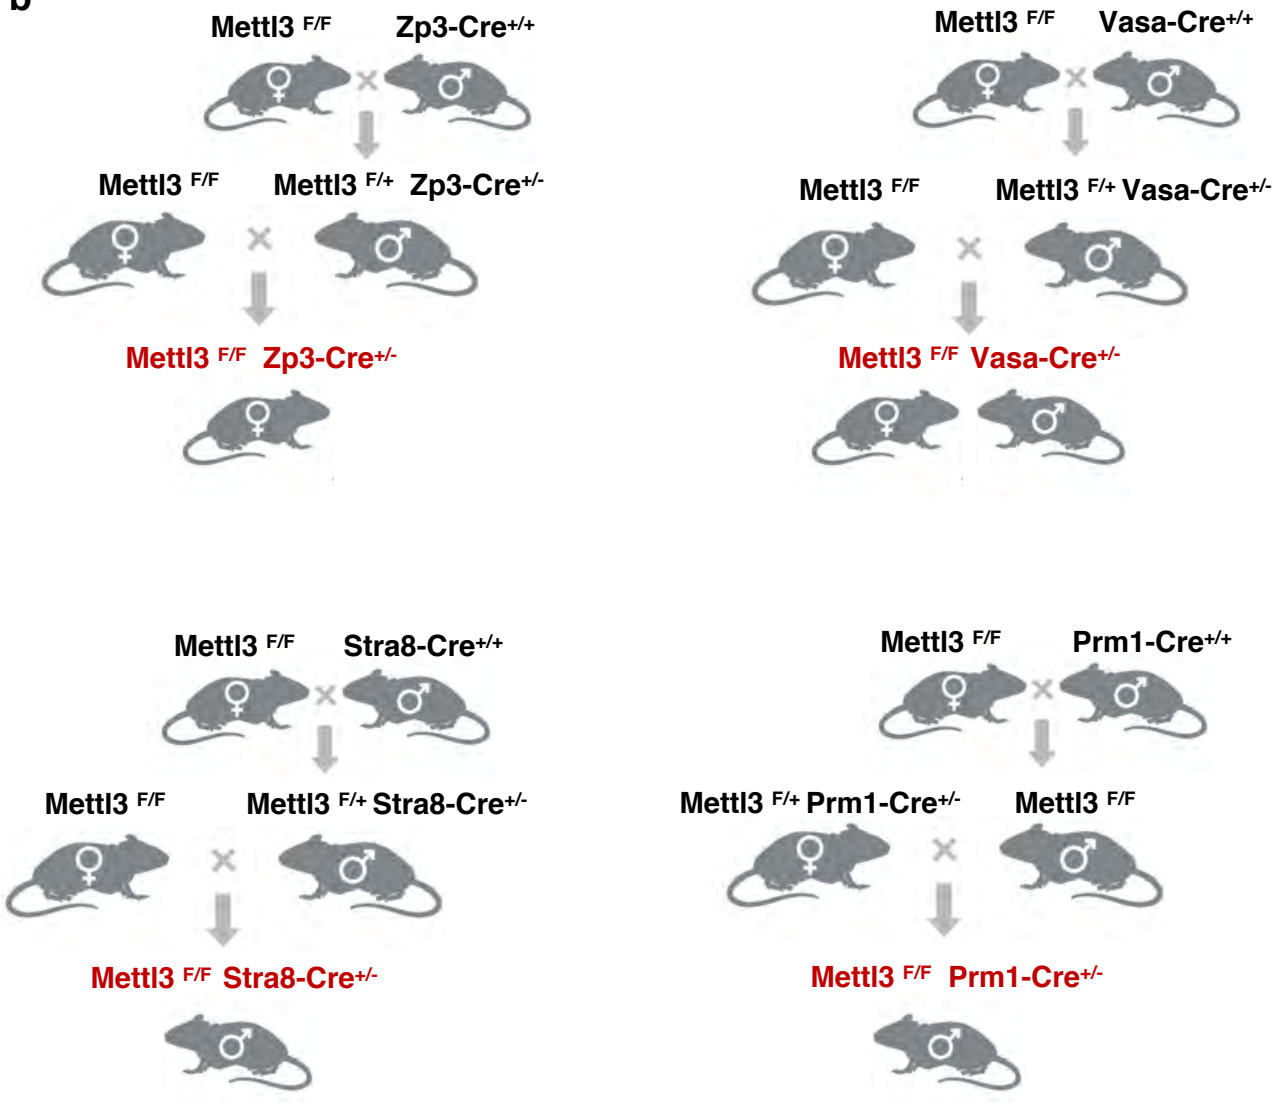

Figure S3. *Mettl3* is essential for female mice fertility

**a**

Response to fertilization

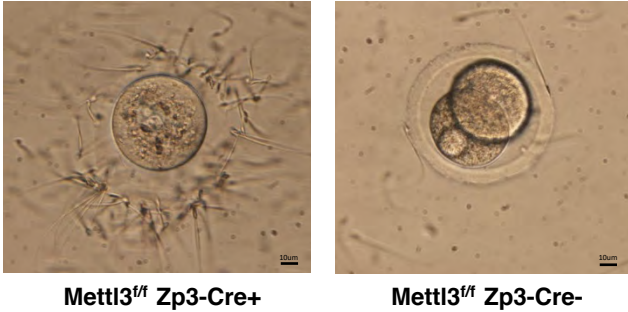

*Mettl3*<sup>ff</sup> Zp3-Cre+

*Mettl3*<sup>ff</sup> Zp3-Cre-

**b**

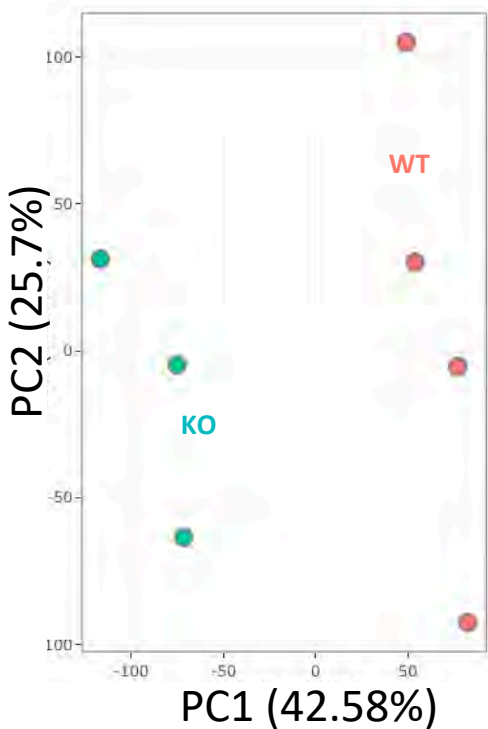

**c**

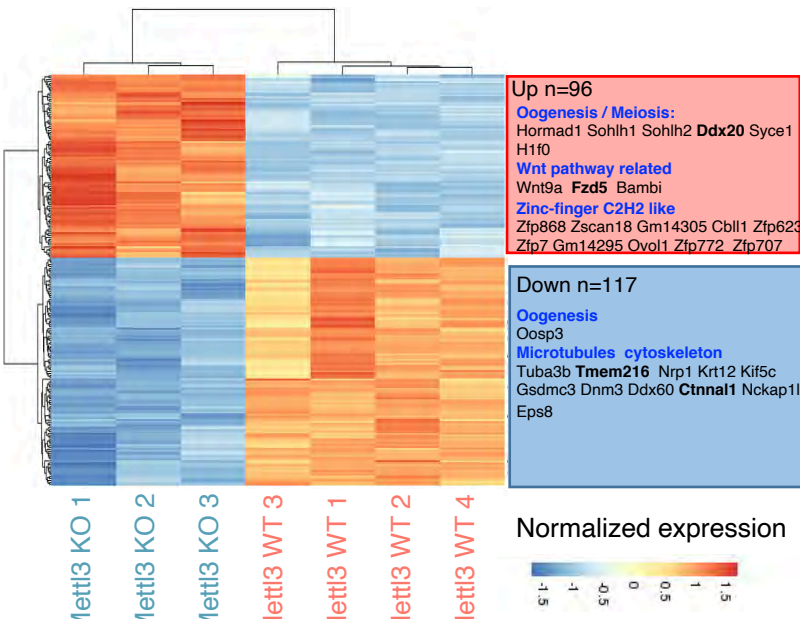

**d**

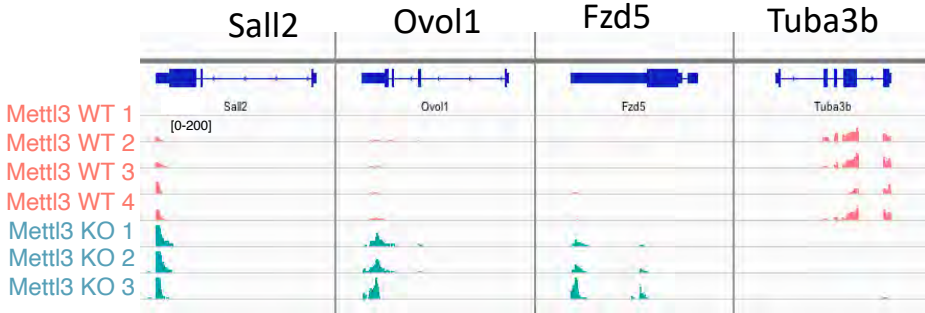

Figure S4. *Mettl3* and *Ythdf2* are essential for male mice fertility

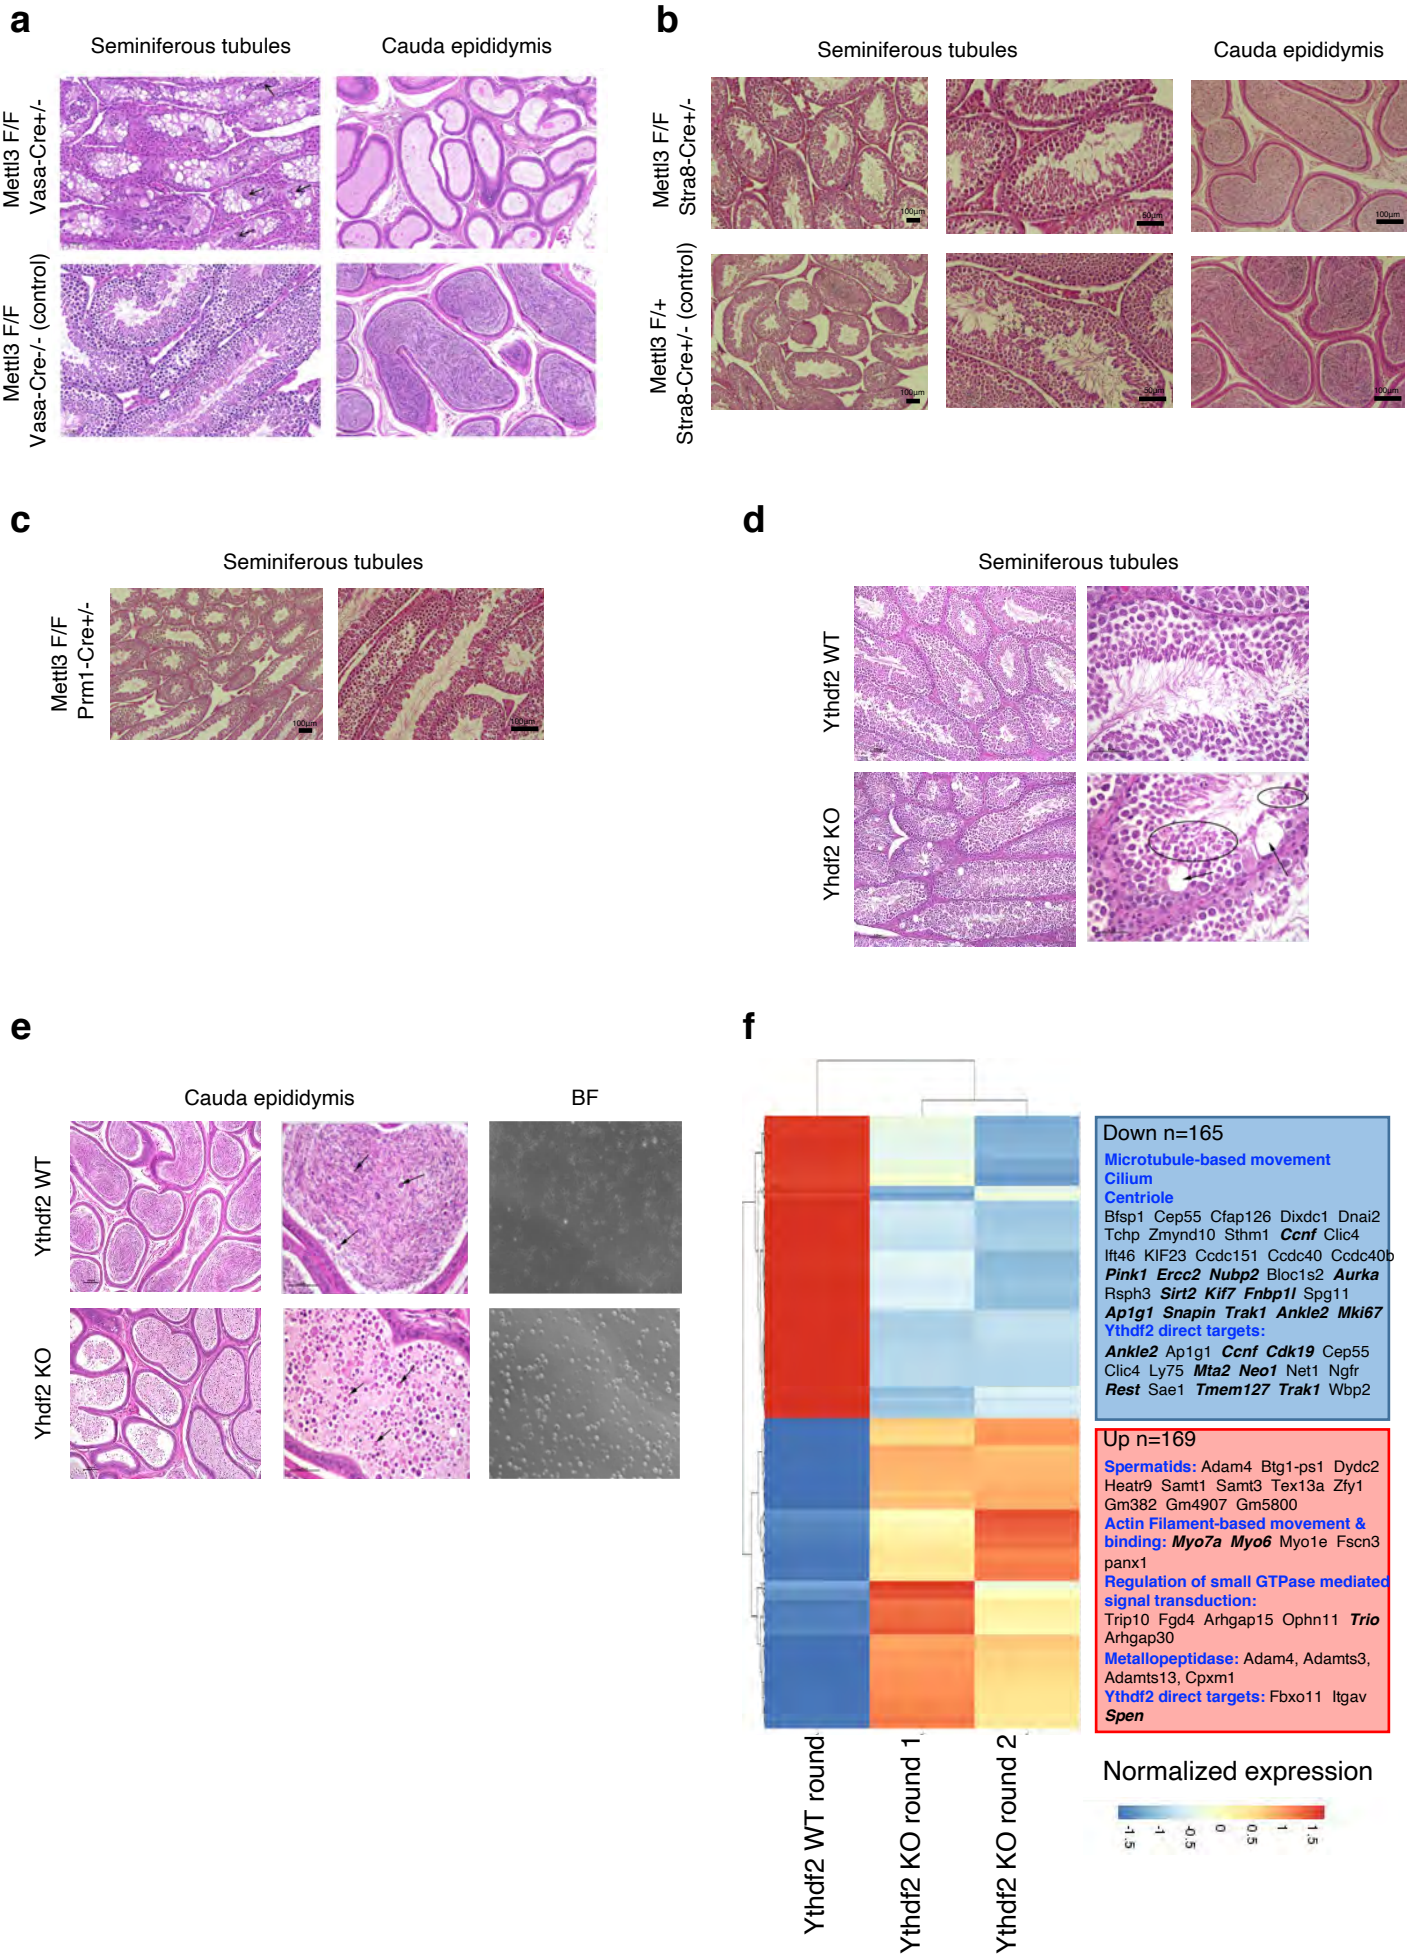

Figure S5. Ythdf1 Knock-Out and Ythdf3 Knock-Out mice are fertile

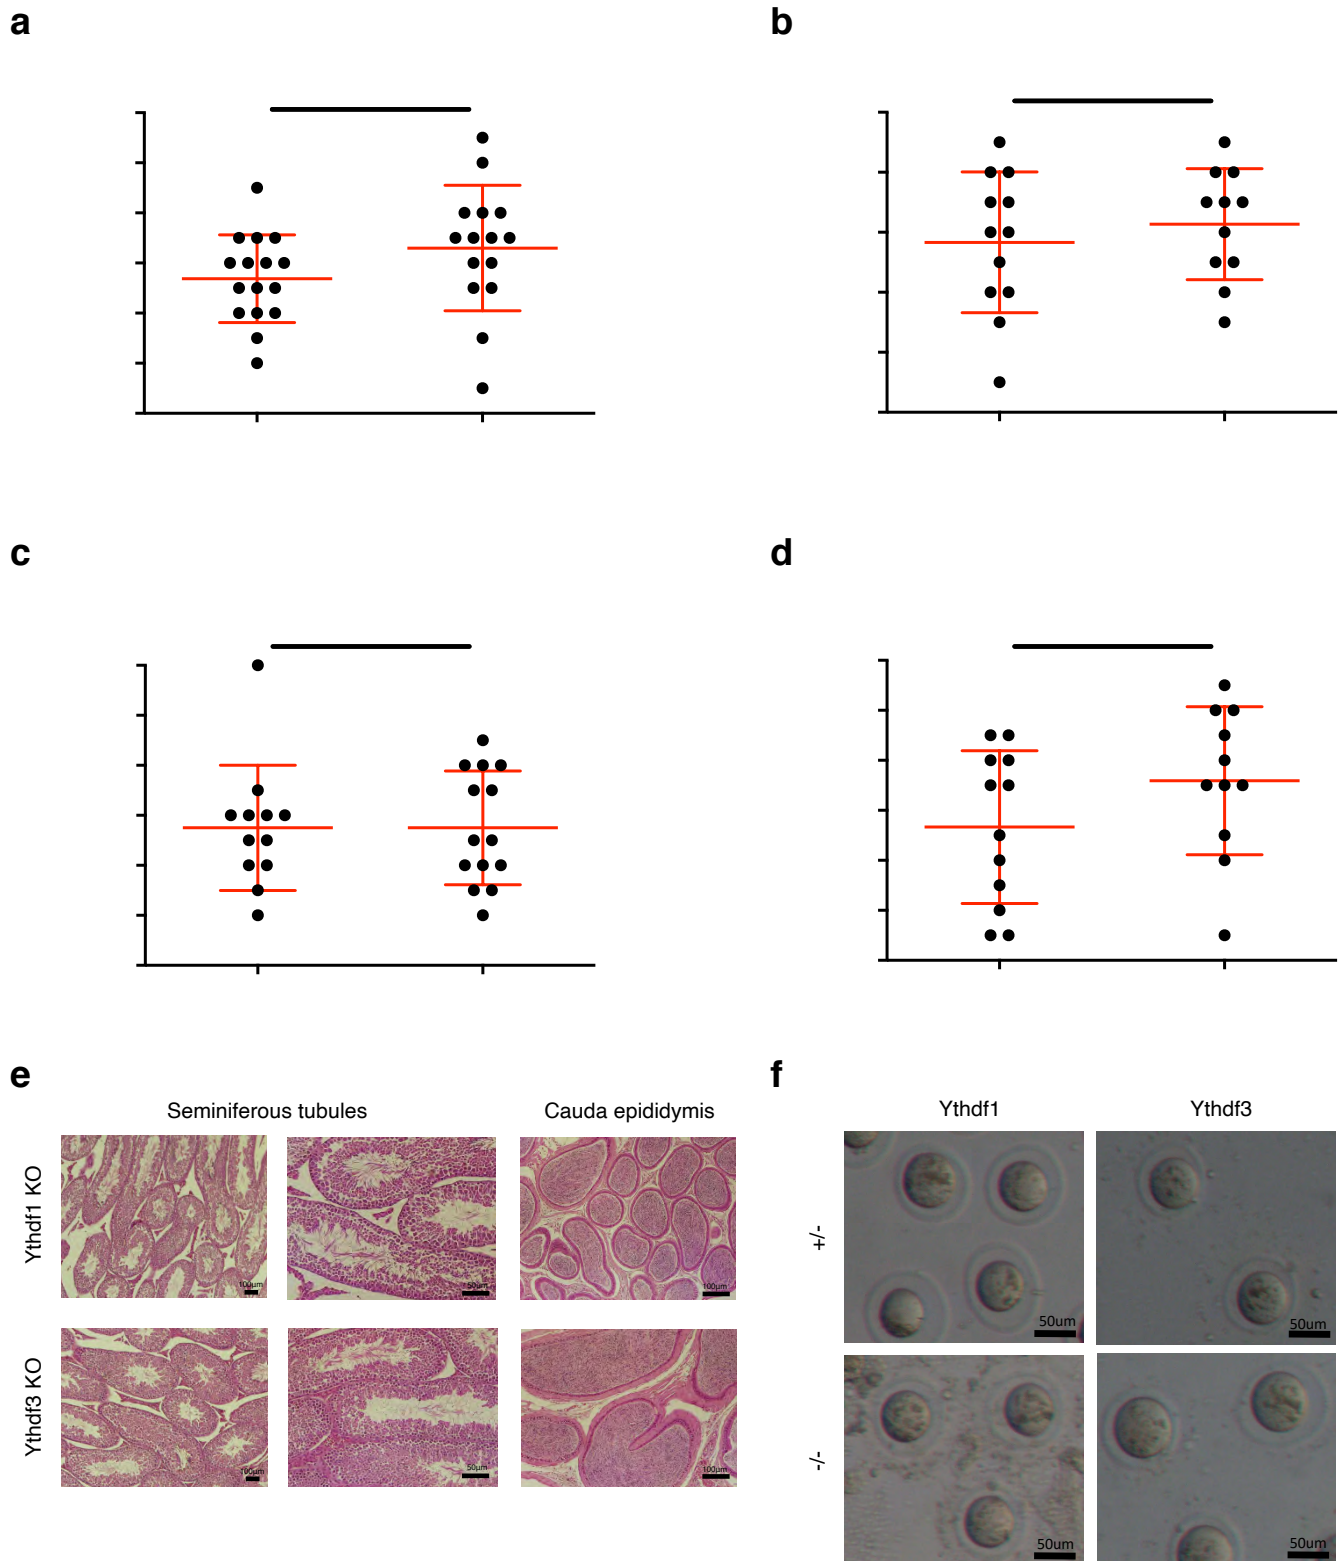

Figure S6. Ythdf2 is essential for female mice fertility

a

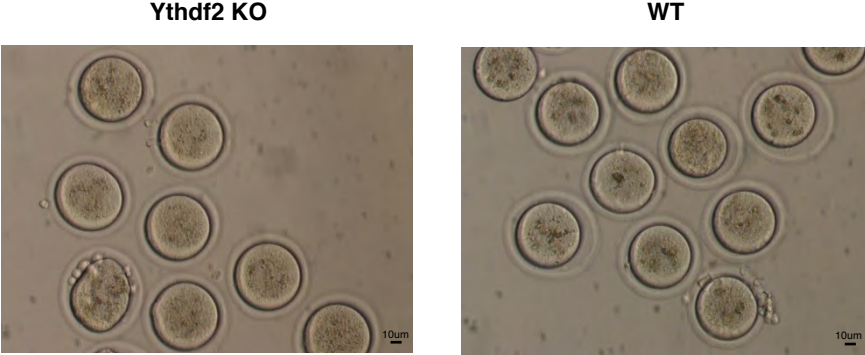

b

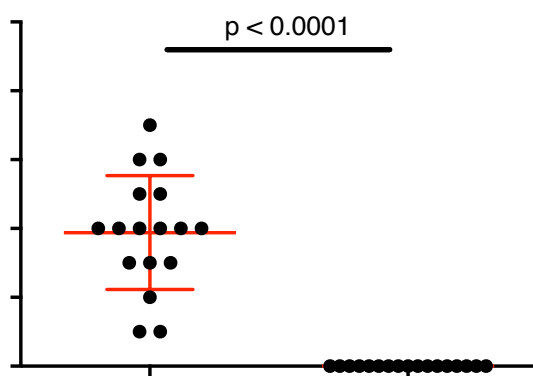

c

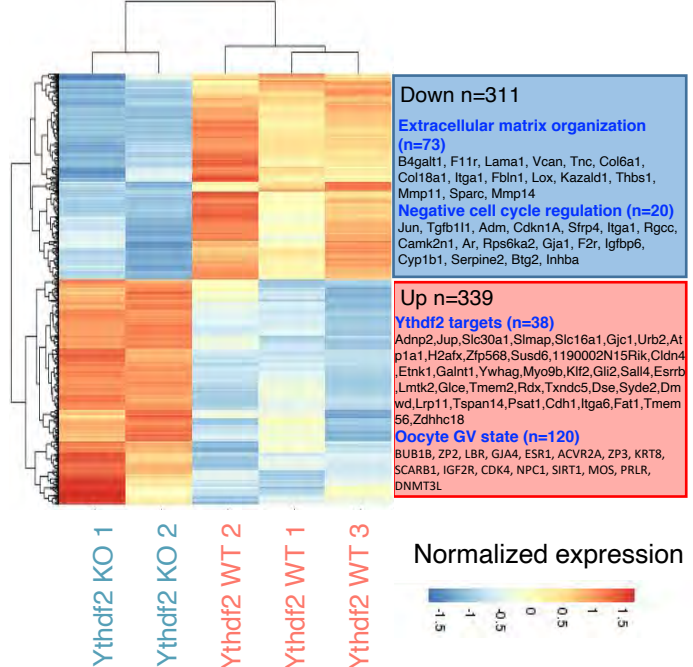

Figure S7. Oocytes staining for Ythdf1, Ythdf2 and Ythdf3

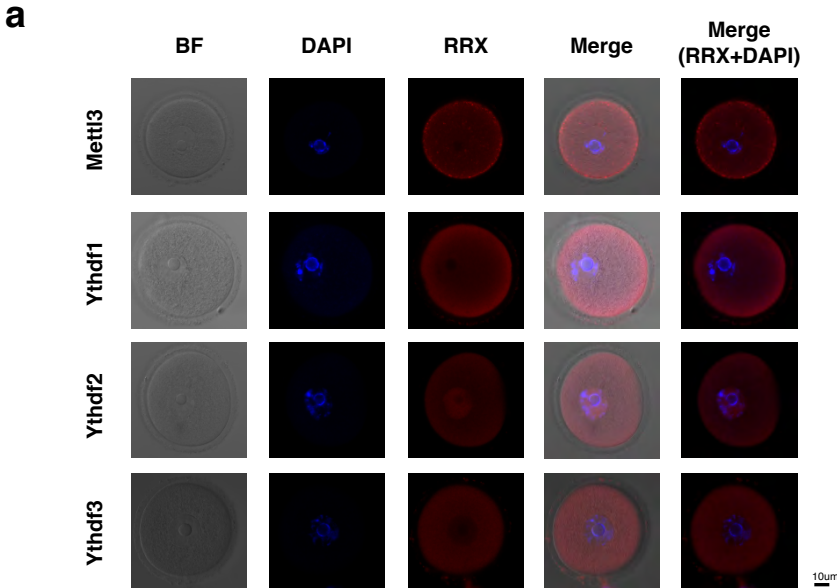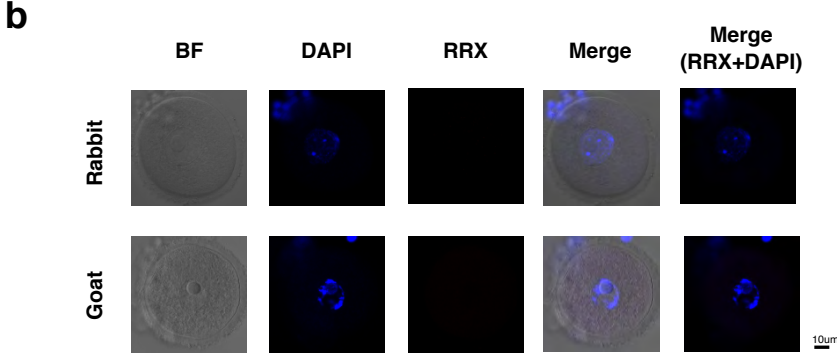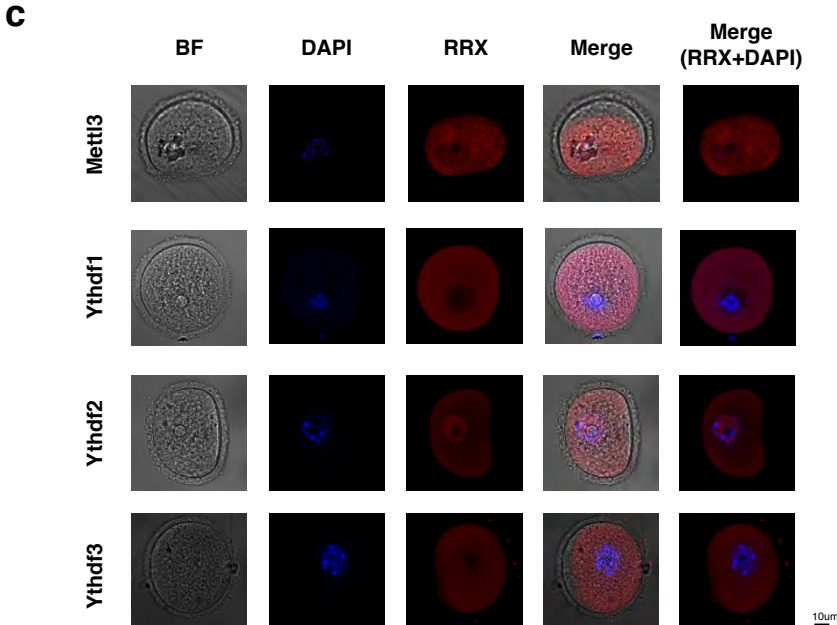

# Figure S8. Generation and validation of Knock-Out mESC lines

**a**

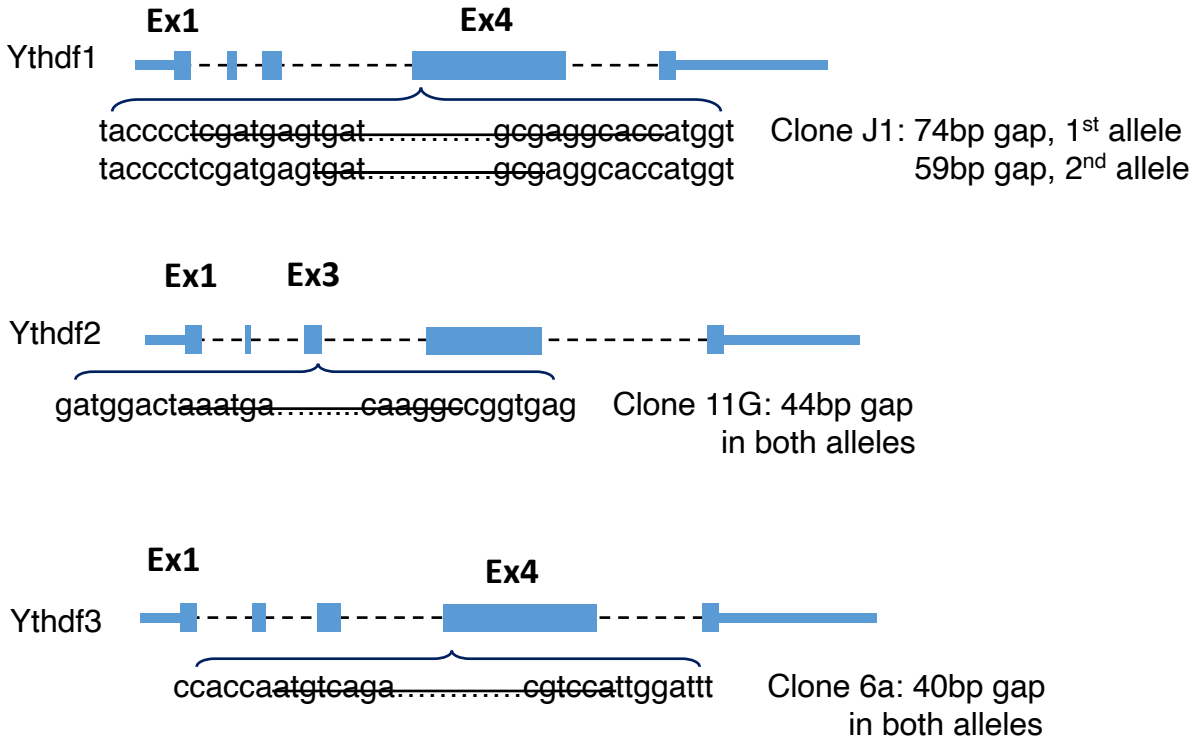

**b**

## mYthdf1 Clone J1 - 74bp gap 59bp gap

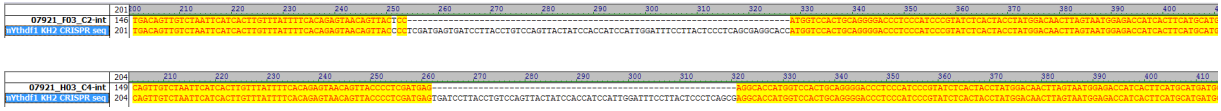

## mYthdf2 Clone 11G - 44bp gap

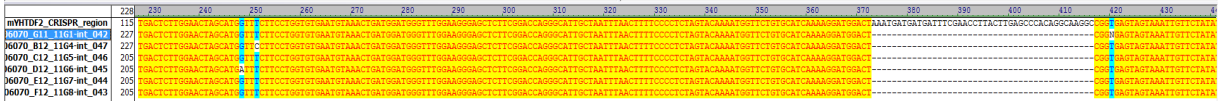

## mYthdf3 Clone 6A - 40bp gap

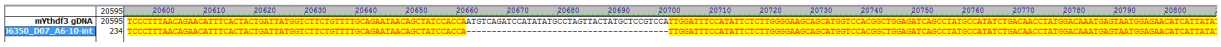

**c**

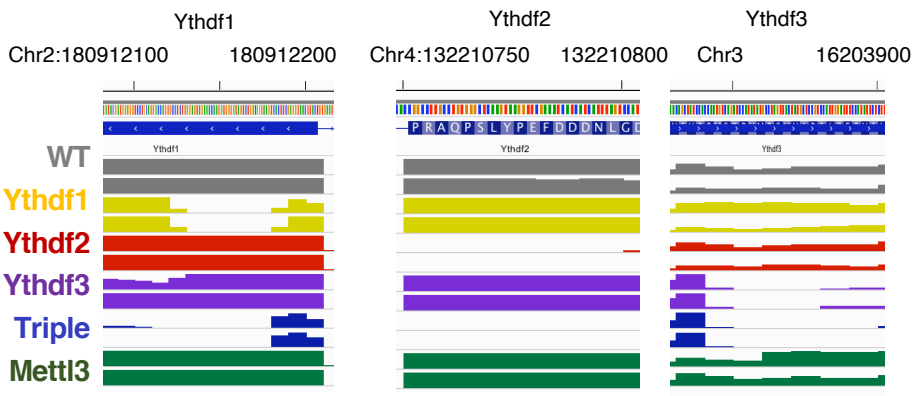

Figure S9. Generation and validation of Knock-Out mESC lines

a

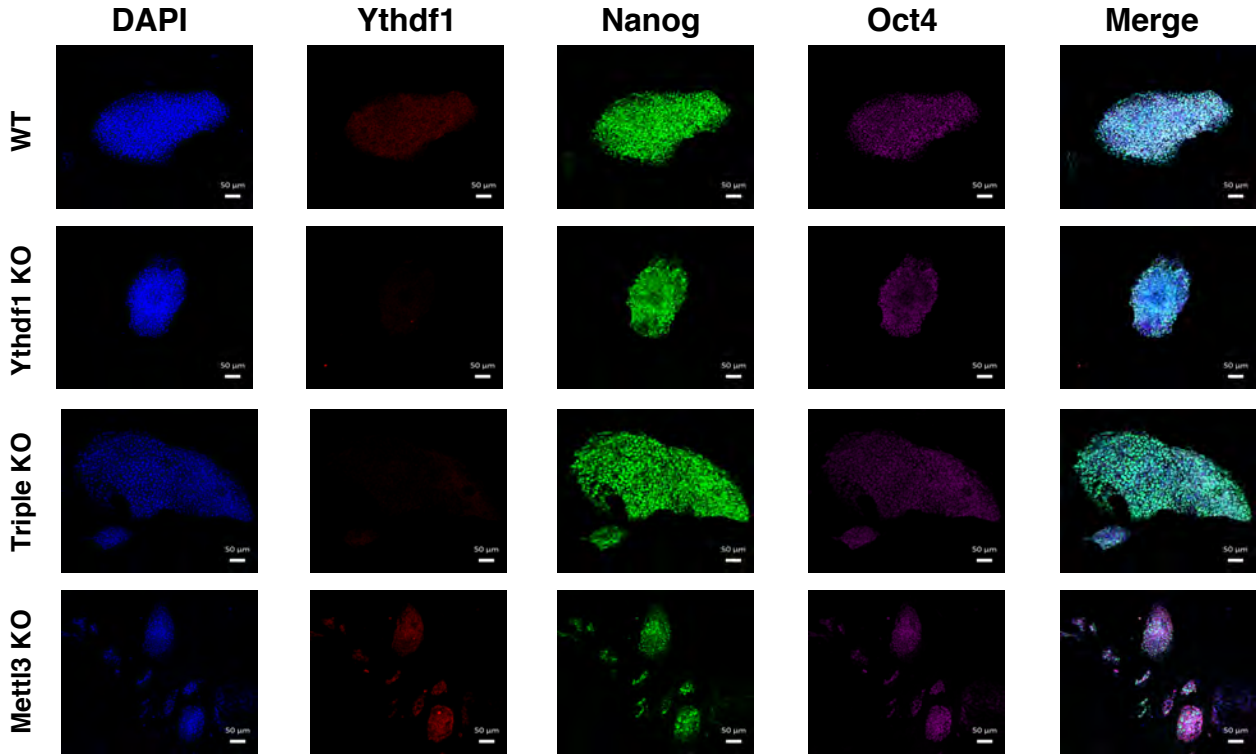

b

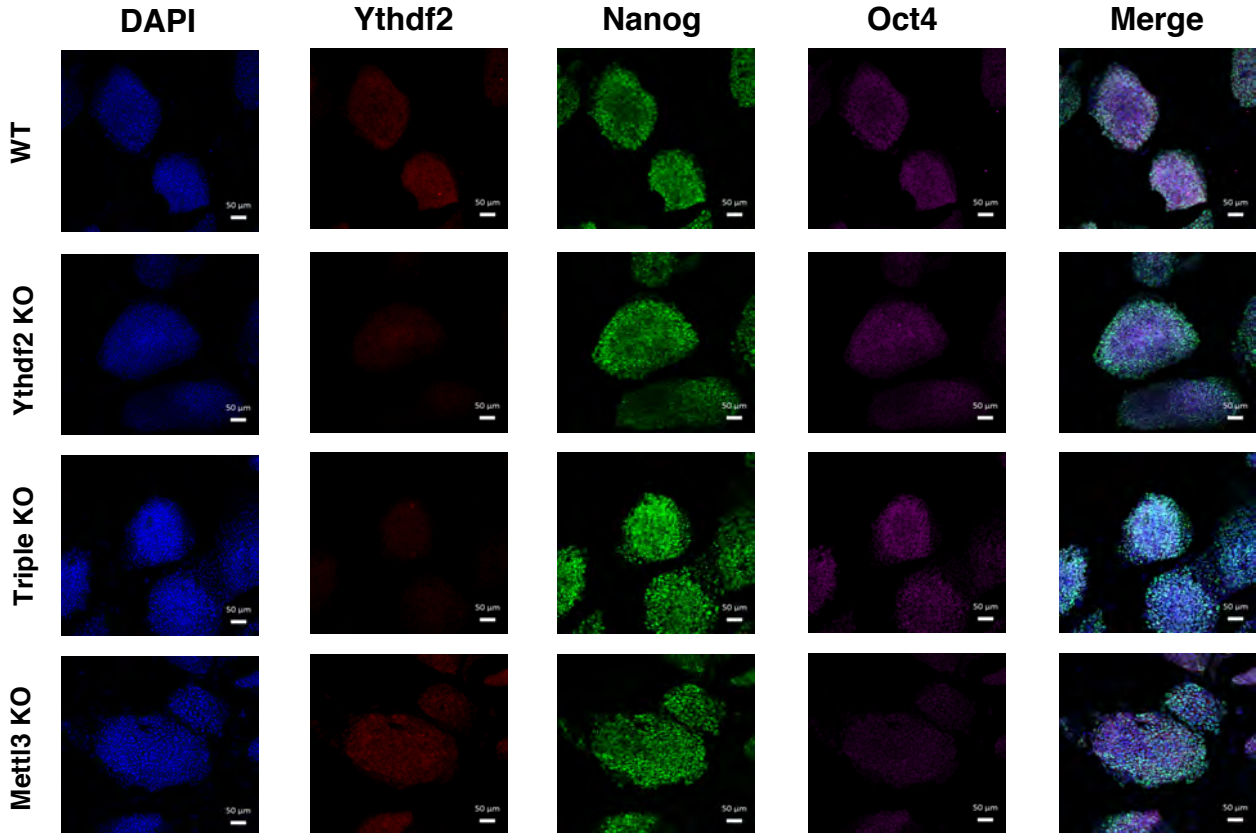



Figure S9..Cont. Generation and validation of Knock-Out mESC lines

**c**

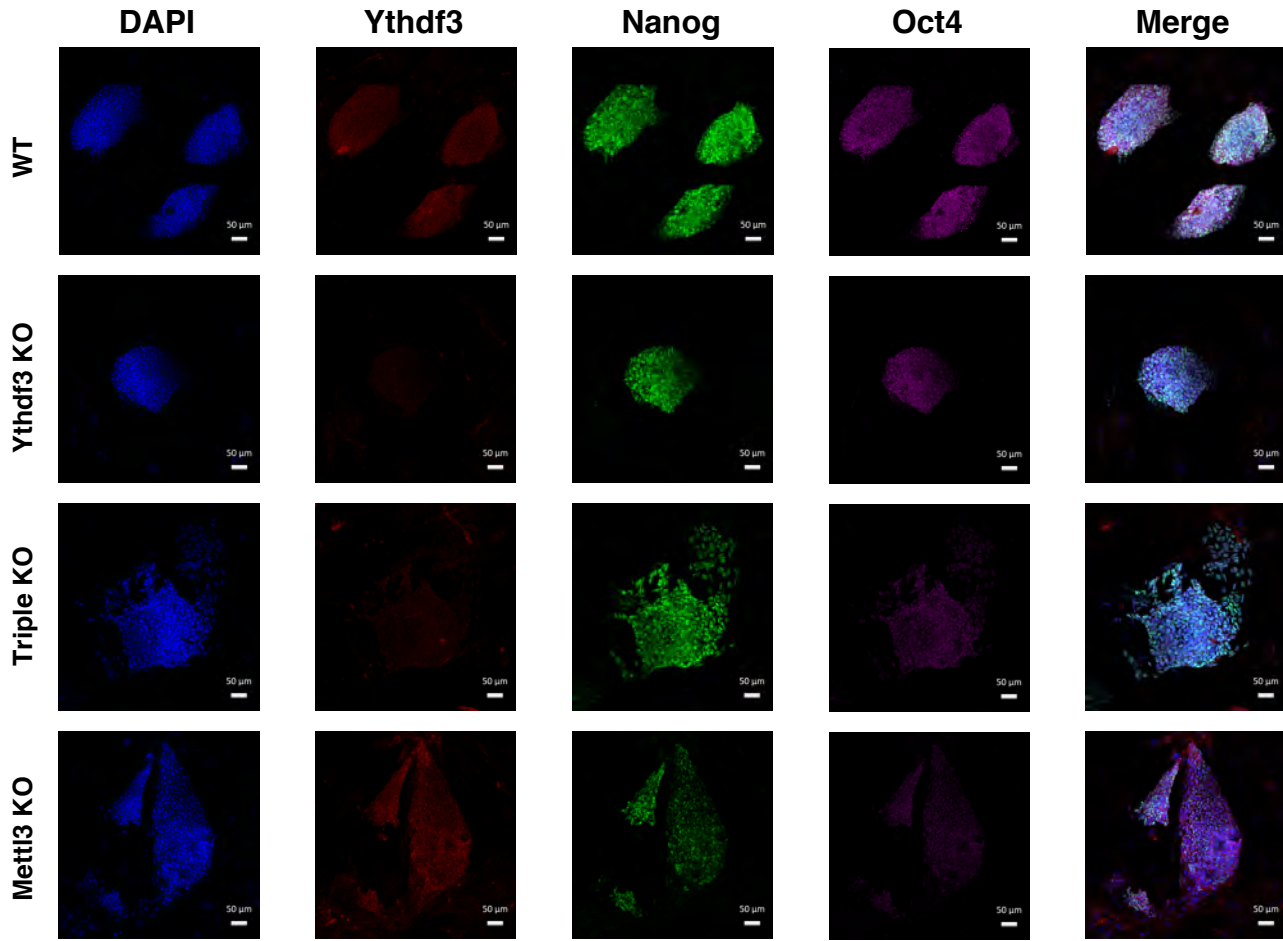

Figure S10. Morphology of Knock-Out mESC lines

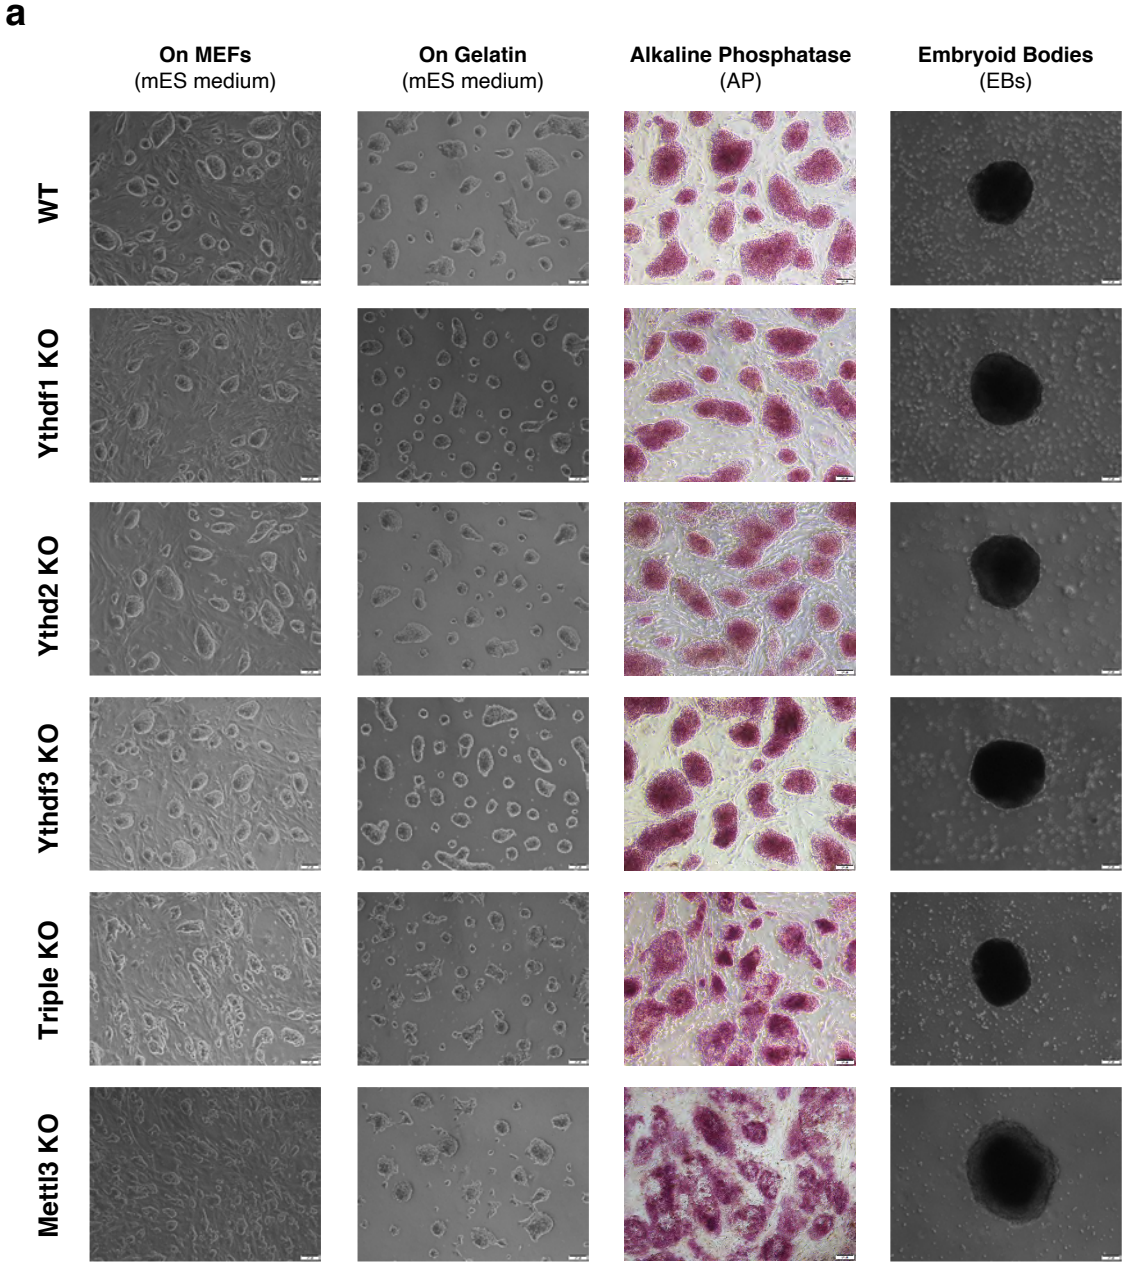

Figure S11. Overlap of ESC signatures

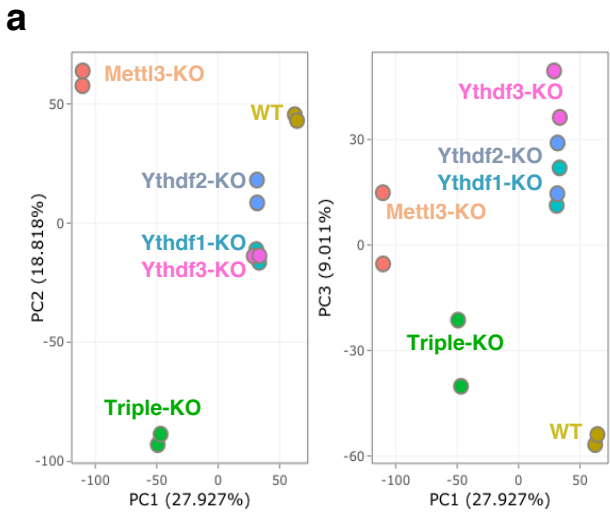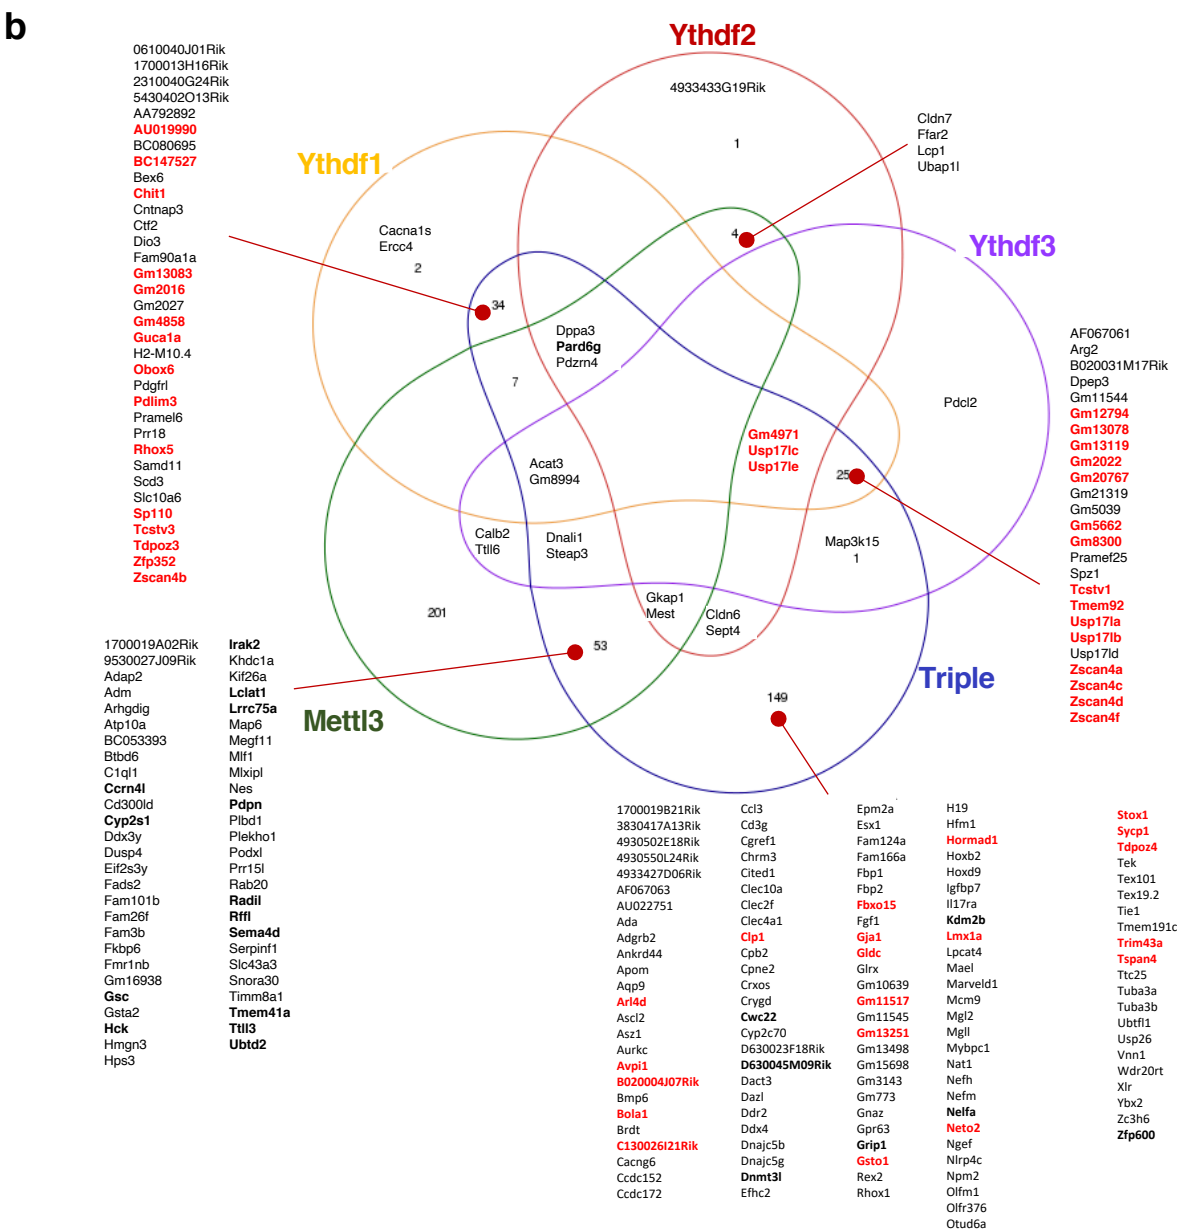

Figure S12. CLIP data evaluation

**a**

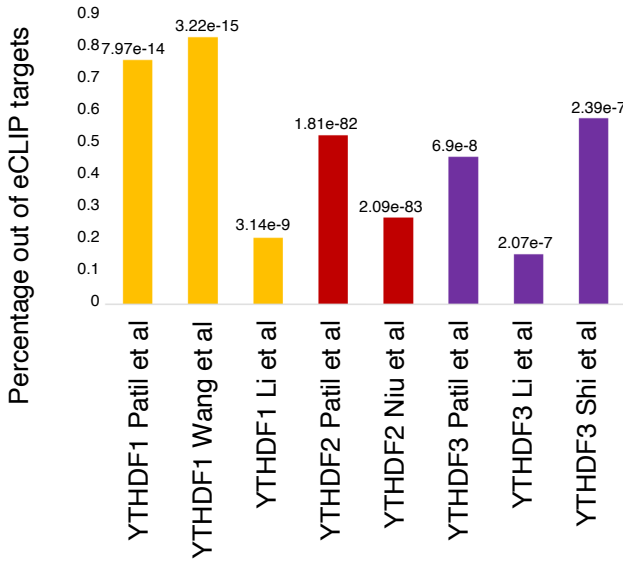

**b**

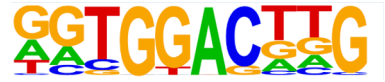

**c**

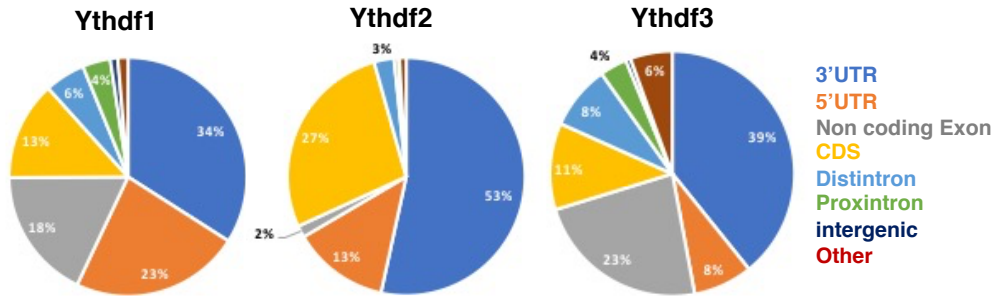

**d**

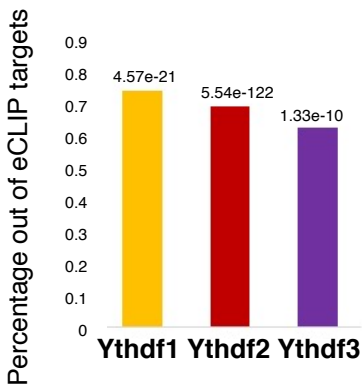

**e**

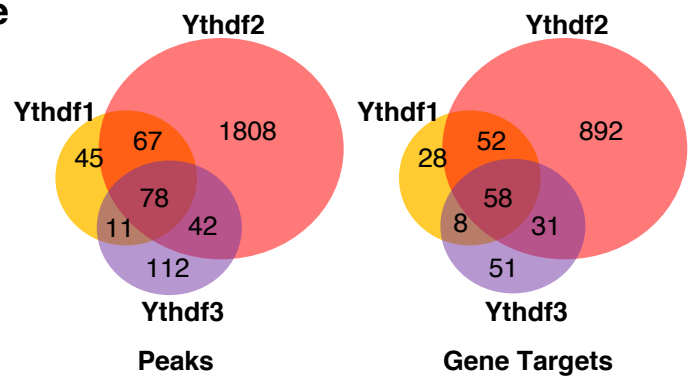

**f**

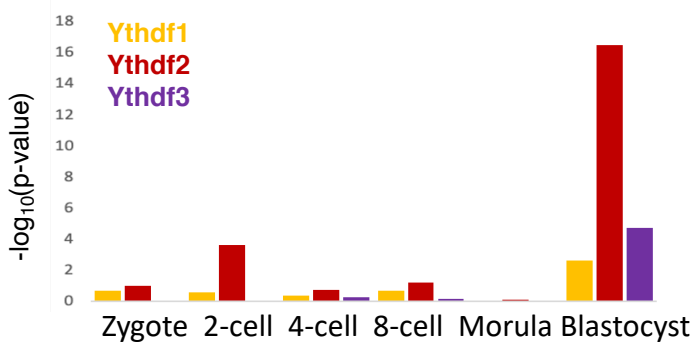

Figure S13. Half life as a function of number of m<sup>6</sup>A peaks

**a**

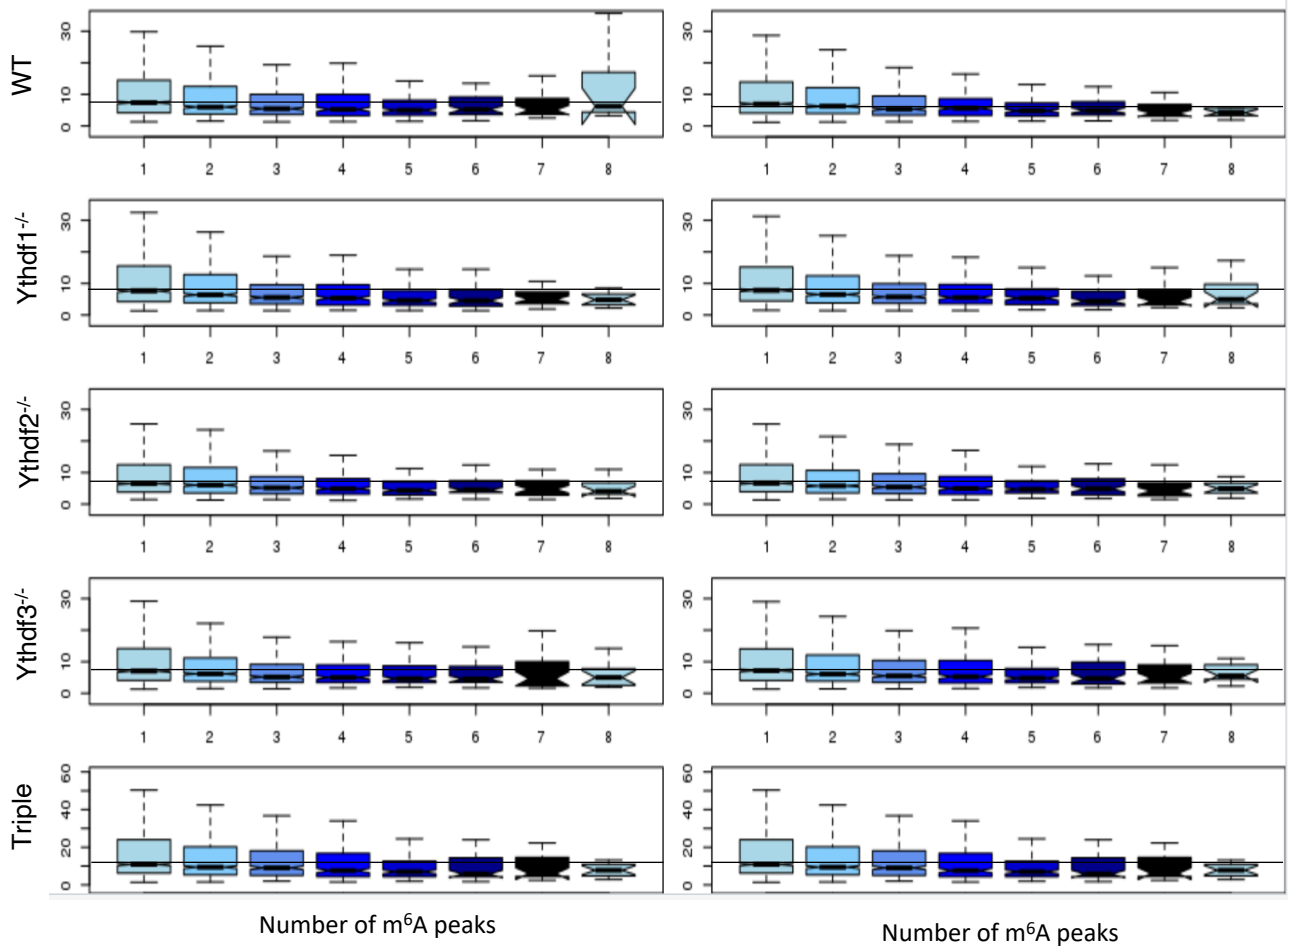

**b**

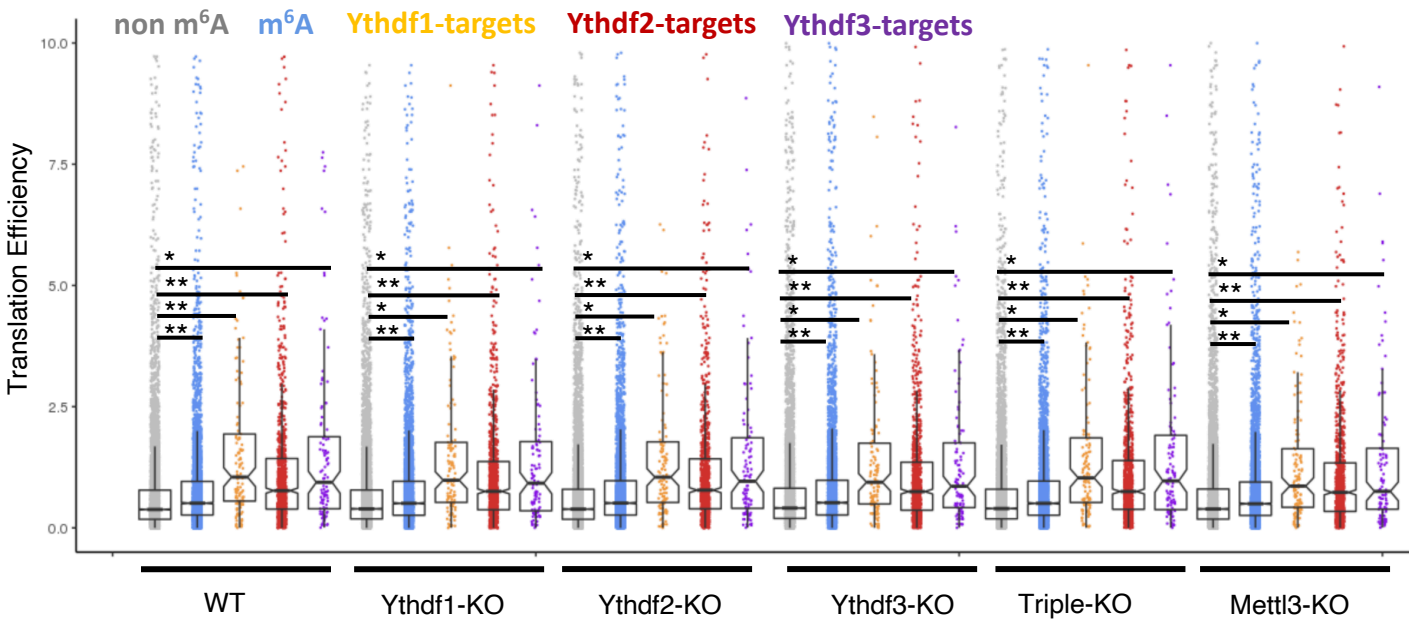

Source: https://www.biorxiv.org/content/biorxiv/early/2020/06/03/2020.06.03.131441.full.pdf
